# Supplementary material for: Is a scaling factor required to obtain closure between measured and modelled atmospheric O 4 absorptions? – A case study for two days during the MADCAT campaign
Source: Copernicus journal article supplement (doi:10.5194/amt-2018-238), 2018-10-11
Supplement: Supplementary file [file amt-2018-238-AC4-supplement.pdf]

1 **Is a scaling factor required to obtain closure between measured and**  
2 **modelled atmospheric O<sub>4</sub> absorptions? — An assessment of uncertainties of**  
3 **measurements and radiative transfer simulations -~~ease study~~ for two days**  
4 **during the MAD-CAT campaign**  
5

6 Thomas Wagner<sup>1</sup>, Steffen Beirle<sup>1</sup>, Nuria Benavent<sup>2</sup>, Tim Bösch<sup>3</sup>, Kai ~~\_\_\_~~ Lok Chan<sup>4</sup>,  
7 Sebastian Donner<sup>1</sup>, Steffen Dörner<sup>1</sup>, Caroline Fayt<sup>5</sup>, Udo Frieb<sup>6</sup>, David Garcia-Nieto<sup>2</sup>, Clio  
8 Gielen<sup>5\*</sup>, David González-Bartolome<sup>7</sup>, Laura Gomez<sup>7</sup>, François Hendrick<sup>5</sup>, Bas Henzing<sup>8</sup>,  
9 Jun Li Jin<sup>9</sup>, Ted Koenig, Johannes Lampel<sup>6</sup>, Jianzhong Ma<sup>10</sup>, Kornelia Mies<sup>1</sup>, Mónica  
10 Navarro<sup>7</sup>, Ivan Ortega, Enno ~~Peters~~<sup>4</sup>Peters<sup>3\*\*</sup>, Gaia Pinardi<sup>5</sup>, Olga Puentedura<sup>7</sup>, Janis  
11 Puķīte<sup>1</sup>, Julia Remmers<sup>1</sup>, Andreas Richter<sup>3</sup>, Alfonso Saiz-Lopez<sup>2</sup>, Reza Shaiganfar<sup>1</sup>, Holger  
12 Sihler<sup>1</sup>, Michel Van Roozendael<sup>5</sup>, Rainer Volkamer, Yang Wang<sup>1</sup>, Margarita Yela<sup>7</sup>  
13

14 <sup>1</sup> Max Planck Institute for Chemistry, Mainz, Germany

15 <sup>2</sup> Department of Atmospheric Chemistry and Climate, Institute of Physical Chemistry  
16 Rocasolano (CSIC), Spain.

17 <sup>3</sup> University of Bremen, Germany

18 <sup>4</sup> Meteorological Institute, Ludwig-Maximilians-Universität München, Germany

19 <sup>5</sup> Royal Belgian Institute for Space Aeronomy (BIRA-IASB), Brussels, Belgium

20 <sup>6</sup> University of Heidelberg, Germany

21 <sup>7</sup> Instituto Nacional de Tecnica Aeroespacial (INTA), Spain

22 <sup>8</sup> TNO, Netherlands Institute for Applied Scientific Research

23 <sup>9</sup> CMA Meteorological Observation Center, China

24 <sup>10</sup> Chinese Academy of Meteorological Science, China

25 \* currently at the Institute of Astronomy, KU Leuven, Belgium

26 \*\* Now at Institute for protection of maritime infrastructures, German Aerospace Center  
27 (DLR), Bremerhaven, Germany  
28

29  
30 **Abstract**

31 In this study the consistency between MAX-DOAS measurements and radiative transfer  
32 simulations of the atmospheric O<sub>4</sub> absorption is investigated on two mainly ~~clear~~cloud-free  
33 days during the MAD-CAT campaign in Mainz, Germany, in Summer 2013. In recent years  
34 several studies indicated that measurements and radiative transfer simulations of the  
35 atmospheric O<sub>4</sub> absorption can only be brought into agreement if a so-called scaling factor  
36 (<1) is applied to the measured O<sub>4</sub> absorption. However, many studies, ~~in particular~~including  
37 such based on direct sun light measurements, came to the opposite conclusion, that there is no  
38 need for a scaling factor. Up to now, there is no broad consensus for an explanation for the  
39 observed discrepancies between measurements and simulations. Previous studies inferred the  
40 need for a scaling factor from the comparison of the aerosol optical depth derived from MAX-  
41 DOAS O<sub>4</sub> measurements with that derived from coincident sun photometer measurements. In  
42 this study a different approach is chosen: the measured O<sub>4</sub> absorption at 360 nm is directly  
43 compared to the O<sub>4</sub> absorption obtained from radiative transfer simulations. The atmospheric  
44 conditions used as input for the radiative transfer simulations were taken from independent  
45 data sets, in particular from sun photometer and ceilometer measurements at the measurement  
46 site. ~~The comparisons are performed for two selected clear days with similar aerosol optical~~  
47 ~~depth but very different aerosol properties. This study has three main goals: First For both~~  
48 ~~days not only the O<sub>4</sub> absorptions are compared, but also~~ all relevant error sources of the

49 spectral analysis, the radiative transfer simulations as well as the extraction of the input  
50 parameters used for the radiative transfer simulations are quantified. One important result  
51 obtained from the analysis of synthetic spectra is that the O<sub>4</sub> absorptions derived from the  
52 spectral analysis agree within 1% with the corresponding radiative transfer simulations at 360  
53 nm. Based on the results from sensitivity studies, recommendations for optimised settings for  
54 the spectral analysis and radiative transfer simulations are given.~~The performed tests and~~  
55 ~~sensitivity studies might be useful for the analysis and interpretation of O<sub>4</sub>-MAX-DOAS~~  
56 ~~measurements in future studies.~~ Second, the measured and simulated results are compared  
57 ~~Different comparison results are found~~ for both days: On 18 June, measurements and  
58 simulations agree within their (rather large) errors (the ratio of simulated and measured O<sub>4</sub>  
59 absorptions is found to be 1.01±0.16). In contrast, on 8 July measurements and simulations  
60 significantly disagree: For the middle period of that day the ratio of simulated and measured  
61 O<sub>4</sub> absorptions is found to be ~~0.71-80~~ ±0.1210, which differs significantly from unity. Thus  
62 for that day a scaling factor is needed to bring measurements and simulations into agreement.  
63 Third, recommendations for further intercomparison exercises are derived. One possible  
64 ~~reason for the comparison results on 18 June is the rather large aerosol extinction (and its~~  
65 ~~large uncertainty) close to the surface, which has a large effect on the radiative transfer~~  
66 ~~simulations.~~ One important recommendation for future studies is that aerosol profile data  
67 should be measured at the same wavelengths as the MAX-DOAS measurements. Also the  
68 altitude range without profile information close to the ground should be minimised and  
69 detailed information of the aerosol optical and/or microphysical properties should be used.  
70 Besides the inconsistent comparison results for both days, also no explanation for a O<sub>4</sub> scaling  
71 factor could be derived in this study. Thus similar, but more extended future studies should be  
72 performed, which preferably include more measurement days, and more instruments ~~and~~  
73 ~~should be supported by more detailed independent aerosol measurements.~~ Also additional  
74 wavelengths should be included. The MAX-DOAS measurements collected during the recent  
75 CINDI-2 campaign are probably well suited for that purpose.

## 77 **1 Introduction**

79 Observations of the atmospheric absorption of the oxygen collision complex (O<sub>2</sub>)<sub>2</sub> (in the  
80 following referred to as O<sub>4</sub>, see Greenblatt et al. (1990)) are often used to derive information  
81 about atmospheric light paths from remote sensing measurements of scattered sun light (made  
82 e.g. from ground, satellite, balloon or airplane). Since atmospheric radiative transport is  
83 strongly influenced by scattering on aerosol and cloud particles, information on the presence  
84 and properties of clouds and aerosols can be derived from O<sub>4</sub> absorption measurements.  
85 Early studies based on O<sub>4</sub> measurements focussed on the effect of clouds (e.g. Erle et al.,  
86 1995; Wagner et al., 1998; Winterrath et al., 1999; Acarreta et al., 2004; Sneeß et al., 2008;  
87 Heue et al., 2014; Gielen et al., 2014; Wagner et al., 2014), which is usually stronger than that  
88 of aerosols. Later also aerosol properties were derived from O<sub>4</sub> measurements, in particular  
89 from Multi-AXis- (MAX-) DOAS measurements (e.g. Hönninger et al., 2004; Wagner et al.,  
90 2004; Wittrock et al., 2004; Friess et al., 2004; Irie et al. Clémer 2010; Friess et al., 2016 and  
91 references therein). For the retrieval of aerosol profiles usually forward model simulations for  
92 various assumed aerosol profiles are compared to measured O<sub>4</sub> slant column densities (SCD,  
93 the integrated O<sub>4</sub> concentration along the atmospheric light path). The aerosol profile  
94 associated with the best fit between the forward model and measurement results is considered  
95 as the most probable atmospheric aerosol profile (for more details, see e.g. Frieß et al., 2006).  
96 Note that in some cases no unique solution might exist, if different atmospheric aerosol  
97 profiles lead to the same O<sub>4</sub> absorptions. MAX-DOAS aerosol retrievals are typically  
98 restricted to altitudes below about 4 km; see Friess et al. (2006).

99 About ten years ago, Wagner et al. (2009) suggested to apply a scaling factor (SF <1) to the  
 100 O<sub>4</sub> SCDs derived from MAX-DOAS measurements at 360 nm in Milano in order to achieve  
 101 agreement with forward model simulations. They found that on a day with low aerosol load  
 102 the measured O<sub>4</sub> SCDs were larger than the model results, even if no aerosols were included  
 103 in the model simulations. If, however, the measured O<sub>4</sub> SCDs were scaled by a SF of 0.81,  
 104 good agreement with the forward model simulations (and nearby AERONET measurements)  
 105 was achieved. Similar findings were then reported by Clémer et al. (2010), who suggested a  
 106 SF of 0.8 for MAX-DOAS measurements in Beijing. Interestingly, they applied this SF to  
 107 four different O<sub>4</sub> absorption bands (360, 477, 577, and 630 nm).  
 108 While with the application of a SF the consistency between forward model and measurements  
 109 was substantially improved, both studies could not provide an explanation for the physical  
 110 mechanism behind such a SF. In the following years several research groups applied a SF in  
 111 their MAX-DOAS aerosol profile retrievals. However, a similarly large fraction of studies  
 112 (including direct sun measurements and aircraft measurements, see Spinei et al. (2015)) did  
 113 not find it necessary to apply a SF to bring measurements and forward model simulations into  
 114 agreement. An overview on the application of a SF in various MAX-DOAS publications after  
 115 2010 is provided in Table 1. Up to now, there is no community consensus on whether or not a  
 116 SF is needed for measured O<sub>4</sub> SCDs. This is a rather unfortunate situation, because this  
 117 ambiguity directly affects the aerosol results derived from MAX-DOAS measurements and  
 118 thus the general confidence in the method.

119  
 120 So far, most of the studies deduced the need for a SF in a rather indirect way: aerosol  
 121 extinction profiles derived from MAX-DOAS measurements using different SF are usually  
 122 compared to independent data sets (mostly AOD from sun photometer observations) and the  
 123 SF leading to the best agreement is selected. In many cases SF between 0.75 and 0.9 were  
 124 derived.

125 In this study, we follow a different approach: similar to Ortega et al. (2016) we directly  
 126 compare the measured O<sub>4</sub> SCDs with the corresponding SCDs derived from a forward model.  
 127 For this comparison, atmospheric conditions which are well characterised by independent  
 128 measurements are chosen. Such a procedure allows in particular quantifying the influence of  
 129 the errors of the individual processing steps.

130 One peculiarity of this comparison is that the measured O<sub>4</sub> SCDs are first converted into their  
 131 corresponding air mass factors (AMF), which are defined as the ratio of the SCD and the  
 132 vertical column density (VCD, the vertically integrated concentration) (Solomon et al., 1987).  
 133

$$134 \quad AMF = \frac{SCD}{VCD} \quad (1)$$

135  
 136 The ‘measured’ O<sub>4</sub> AMF is then compared to the corresponding AMF derived from radiative  
 137 transfer simulations for the atmospheric conditions during the measurements:  
 138

$$139 \quad AMF_{measured} = AMF_{simulated} \quad (2)$$

140  
 141 The conversion of the measured O<sub>4</sub> SCDs into AMFs is carried out to ensure a simple and  
 142 direct comparison between measurements and forward model simulations. Here it should be  
 143 noted that in addition to the AMFs also so-called differential AMFs (dAMFs) will be  
 144 compared in this study. The dAMFs represent the difference between AMFs for  
 145 measurements at non-zenith elevation angles  $\alpha$  and at 90° for the same elevation sequence:  
 146

$$147 \quad dAMF_{\alpha} = AMF_{\alpha} - AMF_{90^{\circ}} \quad (3)$$

148  
149  
150  
151  
152  
153  
154  
155  
156  
157  
158  
159  
160  
161  
162  
163  
164  
165  
166  
167  
168  
169  
170  
171  
172  
173  
174  
175  
176  
177  
178  
179  
180  
181  
182  
183  
184  
185  
186  
187  
188  
189  
190  
191  
192  
193  
194  
195

For the comparison between measured and simulated O<sub>4</sub> (d)AMFs, two mostly ~~clearcloud-free~~ days (18 June and 08 July 2013) during the Multi Axis DOAS Comparison campaign for Aerosols and Trace gases (MAD-CAT) campaign are chosen ([http://joseba.mpch-mainz.mpg.de/mad\\_cat.htm](http://joseba.mpch-mainz.mpg.de/mad_cat.htm)). As discussed in more detail in section 4.2.2, based on the ceilometer and sun photometer measurements, three periods on each of both days are selected, during which the variation of the aerosol profiles was relatively small (see Table 2). In addition to the aerosol profiles, also other atmospheric properties are averaged during these periods before they are used as input for the radiative transfer simulations.

The comparison is carried out for the O<sub>4</sub> absorption band at 360 nm, which is the strongest O<sub>4</sub> absorption band in the UV. In principle also other O<sub>4</sub> absorption bands (e.g. in the visible spectral range) could be chosen, but these bands are not covered by the wavelength range of the MPIC instrument. Thus they are not part of this study.

Deviations between forward model and measurements can have different reasons: In the following an overview on these error sources and the way they are investigated in this study are given:

a) Calculation of O<sub>4</sub> profiles and O<sub>4</sub> VCDs (eq. 1):

Profiles and VCDs of O<sub>4</sub> are derived from pressure and temperature profiles. The errors of the pressure and temperature profiles are quantified by sensitivity studies and by the comparison of the extraction results derived from different groups/persons (see Table 3).

b) Calculation of O<sub>4</sub> (d)AMFs from radiative transfer simulations:

Besides differences between the different radiative transfer codes, the dominating error sources are the uncertainties of the input parameters. They are investigated by sensitivity studies and by the comparison of extracted input data by different groups/persons. Also the effects of operating different radiative transfer models by different groups are investigated.

c) Analysis of the O<sub>4</sub> (d)AMFs from MAX-DOAS measurements:

Uncertainties of the spectral analysis results are caused by errors and imperfections of the measurements/instruments, by the dependence of the analysis results on the specific fit settings, and the uncertainties of the O<sub>4</sub> cross sections. They are investigated by systematic variation of the DOAS fit settings (for measured and synthetic spectra), and by comparison of analysis results obtained from different groups and/or instruments.

The paper is organised as follows: in section 2, information on the selected days during the MAD-CAT campaign, on the MAX-DOAS measurements, and on the data sets from independent measurements is provided. Section 3 presents initial comparison results for the selected days using standard settings. In section 4 the uncertainties associated with each of the various processing steps of the spectral analysis and the forward model simulations are quantified. Section 5 presents a summary and conclusions.

## 2 MAD-CAT campaign, MAX-DOAS instruments and other data sets used in this study

The Multi Axis DOAS Comparison campaign for Aerosols and Trace gases (MAD-CAT) ([http://joseba.mpch-mainz.mpg.de/mad\\_cat.htm](http://joseba.mpch-mainz.mpg.de/mad_cat.htm)) took place in June and July 2013 on the roof of the Max-Planck-Institute for Chemistry in Mainz, Germany. The main aim of the campaign was to compare MAX-DOAS retrieval results of several atmospheric trace gases like NO<sub>2</sub>, HCHO, HONO, CHOCHO as well as aerosols. The measurement location was at 150m above sea level at the western edge of the city of Mainz.

## 196 2.1 MAX-DOAS instruments

197  
198 During the MAD-CAT campaign, 11 MAX-DOAS instruments were operated by different  
199 groups; an overview can be found at the website [http://joseba.mpch-](http://joseba.mpch-mainz.mpg.de/equipment.htm)  
200 [mainz.mpg.de/equipment.htm](http://joseba.mpch-mainz.mpg.de/equipment.htm). The main viewing direction of the MAX-DOAS instruments  
201 was towards north-west ( $51^\circ$  with respect to North). Measurements at this viewing direction  
202 were the main focus of this study, but a few comparisons using the ‘standard settings’ (see  
203 section 3) were also carried out for three other azimuth angles ( $141^\circ$ ,  $231^\circ$ ,  $321^\circ$ , see Fig. A2 I  
204 in appendix A1). Each elevation sequence contains the following elevation angles: 1, 2, 3, 4,  
205 5, 6, 8, 10, 15, 30 and  $90^\circ$ . In this study, in addition to the MPIC instrument, also spectra from  
206 3 other MAX-DOAS instruments were analysed. The instrumental details are given in Table  
207 4. The spectra of the MPIC instrument are available at the website [http://joseba.mpch-](http://joseba.mpch-mainz.mpg.de/e_doc_zip.htm)  
208 [mainz.mpg.de/e\\_doc\\_zip.htm](http://joseba.mpch-mainz.mpg.de/e_doc_zip.htm).

## 210 2.2 Additional data sets

211  
212 In order to constrain the radiative transfer simulations, independent measurements and data  
213 sets were used. In particular, information on atmospheric pressure, temperature and relative  
214 humidity, as well as aerosol properties is used. In addition to local in situ measurements from  
215 air quality monitoring stations and remote sensing measurements by a ceilometer and a sun  
216 photometer, also ECMWF reanalysis data were used. An overview on these data sets is given  
217 in Table 5. The data sets used in this study are available at the websites [http://joseba.mpch-](http://joseba.mpch-mainz.mpg.de/a_doc_zip.htm)  
218 [mainz.mpg.de/a\\_doc\\_zip.htm](http://joseba.mpch-mainz.mpg.de/a_doc_zip.htm) and [http://joseba.mpch-mainz.mpg.de/c\\_doc\\_zip.htm](http://joseba.mpch-mainz.mpg.de/c_doc_zip.htm).

## 220 2.3 RTM simulations

221  
222 Several radiative transfer models are used to calculate  $O_4$  (d)AMFs for the selected days. As  
223 input, vertical profiles of temperature, pressure, relative humidity and aerosol extinction  
224 extracted from the independent data sets (see section 2.2 and 4) were used. The vertical  
225 resolution is high in the lowest layers and decreases with increasing altitude (see Table A1 in  
226 appendix A1). The upper boundary of the vertical grid is set to 1000 km. The lower boundary  
227 of the model grid represents the surface elevation of the instrument (150 m above sea level).  
228 For the ‘standard run’, a surface albedo of 5% is assumed and the aerosol optical properties  
229 are described by a Henyey-Greenstein phase function with an asymmetry parameter of 0.68  
230 and a single scattering albedo of 0.95. Both values represent typical urban aerosols (see e.g.  
231 Dubovik et al., 2002). Ozone absorption was not considered, because it is very small at 360  
232 nm. The MAD-CAT campaign took place around summer solstice. Thus the same dependence  
233 of the solar zenith angle (SZA) and relative azimuth angle (RAZI) on time is used for both  
234 days (see Table A2 in the appendix A1). The input data used for the radiative transfer  
235 simulations are available at the website [http://joseba.mpch-mainz.mpg.de/d\\_doc\\_zip.htm](http://joseba.mpch-mainz.mpg.de/d_doc_zip.htm). In  
236 the following sub-sections the different radiative transfer models used in this study are  
237 described.

### 240 2.3.1 MCARTIM

241  
242 The full spherical Monte Carlo radiative transfer model MCARTIM (Deutschmann et al.,  
243 2011) explicitly simulates individual photon trajectories including the photon interactions  
244 with molecules, aerosol particles and the surface. In this study two versions of MCARTIM are  
245 used: version 1 and version 3. Version 1 is a 1-D scalar model. Version 3 can also be run in 3-  
246 D and vector modes. In version 1 Rotational Raman scattering (RRS) is partly taken into

247 account: the RRS cross section and phase function are explicitly considered for the  
248 determination of the photon paths, but the wavelength redistribution during the RRS events is  
249 not considered. In version 3 RRS can be fully taken into account. If operated in the same  
250 mode (1-D scalar) both models show excellent agreement.

251

252

### 253 **2.3.2 LIDORT**

254

255 In this study the LIDORT version 3.3 was used. The Linearized Discrete Ordinate Radiative  
256 Transfer (LIDORT) forward model (Spurr et al., 2001; Spurr et al., 2008) is based on the  
257 discrete ordinate method to solve the radiative transfer equation (e.g.: Chandrasekhar, 1960;  
258 Chandrasekhar, 1989; Stamnes et al., 1988). This model considers a pseudo-spherical multi-  
259 layered atmosphere including several anisotropic scatters. The formulation implemented  
260 corrects for the atmosphere curvature in the solar and single scattered beam, however the  
261 multiple scattering term is treated in the plane-parallel approximation. The properties of each  
262 of the atmospheric layers are considered homogenous in the corresponding layer. Using finite  
263 differences for the altitude derivatives, this linearized code converts the problem into a linear  
264 algebraic system. Through first order perturbation theory, it is able to provide radiance field  
265 and radiance derivatives with respect to atmospheric and surface variables (Jacobians) in a  
266 single call. LIDORT was used in several studies to derive vertical profiles of aerosols and  
267 trace gases from MAX-DOAS (e.g. Clémer et al., 2010; Hendrick et al., 2014; Franco et al.,  
268 2015).

269

270

### 271 **2.3.3 SCIATRAN**

272

273 The RTM SCIATRAN (Rozañov et al. 2014) was used in its full-spherical mode including  
274 multiple scattering but without polarization. In the operation mode used here, SCIATRAN  
275 solves the transfer equations using the discrete ordinate method. In this study, SCIATRAN  
276 was used by two groups: The IUP Bremen group used v3.8.3 for the for the O<sub>4</sub> dAMFs  
277 simulations (without Raman scattering). The MPIC group used v3.6.11 for the calculation of  
278 synthetic spectra (see Section 2.4) and for the O<sub>4</sub> dAMFs simulations (including Raman  
279 scattering).

280

281

## 282 **2.4 Synthetic spectra**

283

284 In addition to AMFs and dAMFs, also synthetic spectra were simulated. They are analysed in  
285 the same way as the measured spectra, which allows the investigation of two important  
286 aspects:

287 a) The derived O<sub>4</sub> dAMFs from the synthetic spectra can be compared to the O<sub>4</sub> dAMFs  
288 obtained directly from the radiative simulations at one wavelength (here: 360 nm) using the  
289 same settings. In this way the consistency of the spectral analysis results and the radiative  
290 transfer simulations is tested.

291 b) Sensitivity tests can be performed varying several fit parameters, e.g. the spectral range or  
292 the DOAS polynomial, and their effect on the derived O<sub>4</sub> dAMFs can be assessed.

293 Synthetic spectra are simulated using SCIATRAN taking into account rotational Raman  
294 scattering. The basic simulation settings are the same as for the RTM simulations of the O<sub>4</sub>  
295 (d)AMFs described above. In order to minimise the computational effort, for the profiles of  
296 temperature, pressure, relative humidity and aerosol extinction the input data for only two  
297 periods (18 June: 11:00 – 14:00, 08 July: 7:00 – 11:00, see Table 2) are used for the whole

298 day. Thus ‘perfect’ agreement with the measurements can only be expected for the two  
299 selected periods. Aerosol optical properties (phase function and single scattering albedo) are  
300 taken from AERONET measurements of the two selected days. Although the wavelength  
301 dependencies of both quantities (and also for the aerosol extinction) are considered, it should  
302 be noted that the associated uncertainties are probably rather large, since the optical properties  
303 in the UV had to be extrapolated from measurements in the visible spectral range. ~~Moreover,~~  
304 ~~the phase functions were not available as fully consolidated AERONET level 2.0 data, but~~  
305 ~~only as level 1.5 data.~~

306 Spectra were simulated at a spectral resolution of 0.01 nm and convolved with a Gaussian slit  
307 function of 0.6 nm full width at half maximum (FWHM), which is similar to those of the  
308 measurements. For the generation of the spectra a high resolution solar spectrum (Chance and  
309 Kurucz, 2010) and the trace gas absorptions of O<sub>3</sub>, NO<sub>2</sub>, HCHO, and O<sub>4</sub> are considered (see  
310 Table A3 in appendix A1). The assumed tropospheric profiles of NO<sub>2</sub> and HCHO are similar  
311 to those retrieved from the MAX-DOAS observations during the selected periods. Time series  
312 of the tropospheric VCDs of NO<sub>2</sub> and HCHO for the two selected days are shown in Fig. A1  
313 in appendix 1.

314 Two sets of synthetic spectra were simulated, one taking into account the temperature  
315 dependence of the O<sub>4</sub> cross section and the other not. For the case without considering the  
316 temperature dependence the O<sub>4</sub> cross section for 293 K is used. In addition to spectra without  
317 noise, also spectra with noise (sigma of the noise is assumed as  $7.5 \cdot 10^{-4}$  times the intensity)  
318 were simulated. The synthetic spectra are available at the website [http://joseba.mpch-](http://joseba.mpch-mainz.mpg.de/f_doc_zip.htm)  
319 [mainz.mpg.de/f\\_doc\\_zip.htm](http://joseba.mpch-mainz.mpg.de/f_doc_zip.htm).

### 321 **3 Strategies used in this studies and comparison results for ‘standard settings’**

#### 322 **3.1 Selection of days**

323 For the comparison of measured and simulated O<sub>4</sub> dAMFs, two mostly clearcloud-free days  
324 during the MAD-CAT campaign (18 June and 8 July 2013) were selected. On both days the  
325 AOD measured by the AERONET sun photometer at 360 nm is between 0.25 and 0.4 (see  
326 Fig. 1). In spite of the similar AOD, very different aerosol properties at the surface are found  
327 on the two days: on 18 June much higher concentrations of large aerosol particles (PM<sub>2.5</sub> and  
328 PM<sub>10</sub>) are found. These differences are also represented by the large differences of the  
329 Ångström parameter for long wavelengths (440 – 870 nm) on both days. Also the aerosol  
330 height profiles are different: On 8 July rather homogenous profiles with a layer height of  
331 about 2 km occur. On 18 June the aerosol profiles reach to higher altitudes, but the highest  
332 extinction is found close to the surface. Also the temporal variability of the aerosol properties,  
333 especially the near-surface concentrations, is much larger on 18 June.

#### 334 **3.2 Different levels of comparisons**

335 The comparison between the forward model and MAX-DOAS measurements is performed in  
336 different depth for different subsets of the measurements:

337 a) A quantitative comparison of O<sub>4</sub> AMFs and O<sub>4</sub> dAMFs is performed for 3° elevation angle  
338 at the standard viewing direction (51° with respect to North) for the middle periods of both  
339 selected days. During these periods the uncertainties of the measurement and the radiative  
340 transfer simulations are smallest because around noon the measured intensities are high and  
341 the variation of the SZA is small. During the selected periods, also the variation of the  
342 ceilometer profiles is relatively small. These comparisons thus constitute the core of the  
343 comparison exercise and all sensitivity studies are performed for these two periods. The  
344 elevation angle of 3° is selected because for such a low elevation angle the atmospheric light  
345  
346  
347  
348

349 paths and thus the O<sub>4</sub> absorption are rather large. Moreover, as can be seen in Fig. 2, the O<sub>4</sub>  
350 (d)AMFs for 3° are very similar to those for 1° and 6°, especially on 8 July 2013. Sensitivity  
351 studies showed that a wrong elevation calibration ( $\pm 0.5^\circ$ ) led to only small changes (<1%)  
352 of the O<sub>4</sub> (d)AMFs. Changes of the field of view between 0.2 and 1.1° led to even smaller  
353 differences. ~~This~~ ~~These~~ findings indicates that possible uncertainties of the calibration of the  
354 elevation angles of the instruments can be neglected. Here it is interesting to note that on 18  
355 June even slightly lower O<sub>4</sub> (d)AMFs are found for the low elevation angles. This is in  
356 agreement with the finding of high aerosol extinction in a shallow layer above the surface (see  
357 Fig. 1). The azimuth angle of 51° is chosen, because it was the standard viewing direction  
358 during the MAD-CAT campaign and measurements for this direction are available from  
359 different instruments.

360 b) The quantitative comparison for 3° elevation and azimuth of 51° is also extended to the  
361 periods prior and after the middle periods of the selected days. However, to minimise the  
362 computational efforts, some sensitivity studies are not carried out for the first and last periods.  
363 c) The comparison is extended to more elevation angles (1°, 3°, 6°, 10°, 15°, 30°, 90°) and  
364 azimuth angles (51°, 141°, 231°, 321°). For this comparison only the standard settings for the  
365 DOAS analysis and the radiative transfer simulations are applied (see Tables 6 and 7). The  
366 comparison results for the MPIC MAX-DOAS measurements are shown in appendix A2. The  
367 purpose of this comparison is to check whether for other viewing angles similar results are  
368 found as for 3° elevation at 51° azimuth direction.

### 369 **3.3 Quantitative comparison for 3° elevation in standard azimuth direction**

370 Fig. 3 presents a comparison of the measured and simulated O<sub>4</sub> (d)AMFs for 3° elevation and  
371 51° azimuth on both days. For the spectral analysis and the radiative transfer simulations the  
372 respective ‘standard settings’ (see Tables 6 and 7) were used. On 8 July the simulated O<sub>4</sub>  
373 (d)AMFs systematically underestimate the measured O<sub>4</sub> (d)AMFs by up to 40%. Similar  
374 results are also obtained for other elevation and azimuth angles (see appendix ~~A1~~A2), the  
375 differences becoming smaller towards higher elevation angles. In contrast, no systematic  
376 underestimation is observed for most of 18 June. For some periods of that day the simulated  
377 O<sub>4</sub> (d)AMFs are even larger than the measured O<sub>4</sub> (d)AMFs. However, here it should be  
378 noted that the aerosol extinction profile of the ‘standard settings’ (using linear extrapolation  
379 below 180 m where no ceilometer data are available) probably underestimates the aerosol  
380 extinction close to the surface. If instead a modified aerosol profile with strongly increased  
381 aerosol extinction below 180 m and the maximum AOD during that period is used (see Fig.  
382 A31 in appendix A5) the corresponding (d)AMFs fall below the measured O<sub>4</sub> (d)AMFs  
383 (green curves in Fig. A4 in appendix A2). More details on the extraction of the aerosol  
384 extinction profiles are given in section 4.2.2 and appendix A5).

385 The average ratio of simulated to measured (d)AMFs (for the standard settings) during the  
386 middle periods on both days are given in Table 8. For 18 June they are close to unity, for 8  
387 July they are much lower (0.83 for the AMF, and 0.69 for the dAMF).

## 390 **4 Estimation of the uncertainties of the different processing steps**

391 There are 3 major processing steps, for which the uncertainties are quantified in this section:

- 392 a) The determination of the O<sub>4</sub> height profiles and corresponding O<sub>4</sub> vertical column densities.
- 393 b) The simulation of O<sub>4</sub> (d)AMFs by the forward model
- 394 c) The analysis of O<sub>4</sub> (d)AMFs from the MAX-DOAS measurements.

### 395 **4.1 Determination of the vertical O<sub>4</sub> profile and the O<sub>4</sub> VCD**



400  
401  
402  
403  
404  
405  
406  
407  
408  
409  
410  
411  
412  
413  
414  
415  
416  
417  
418  
419  
420  
421  
422  
423  
424  
425  
426  
427  
428  
429  
430  
431  
432  
433  
434  
435  
436  
437  
438  
439  
440  
441  
442  
443  
444  
445  
446  
447  
448  
449

The O<sub>4</sub> VCD is required for conversion of measured (d)SCDs into (d)AMFs (eq. 1). O<sub>4</sub> profiles are also needed for the calculation of O<sub>4</sub> (d)AMFs. The accuracy of the calculated O<sub>4</sub> height profile and the O<sub>4</sub> VCD depends in particular on two aspects:

- a) is profile information on temperature, pressure and (relative) humidity available?
- b) what is the accuracy of these data sets?

Additional uncertainties are related to the details of the calculation of the O<sub>4</sub> concentration and O<sub>4</sub> VCDs from these profiles. Both error sources are investigated in the following sub sections.

#### 4.1.1 Extraction of vertical profiles of temperature and pressure

The procedure of extracting temperature and pressure profiles depends on the availability of measured profile data or surface measurements. If profile data are available (e.g. from sondes or models) they could be directly used. If only surface measurements are available, vertical profiles of temperature and pressure could be calculated making assumptions on the lapse rate (here we assume a value of -0.65 K / 100 m). If no measurements or model data are available, profiles from the US standard atmosphere might be used (United States Committee on Extension to the Standard Atmosphere, 1976). In appendix A3 the different procedures are described in detail for the two days of the MAD-CAT campaign. For these days the optimum choice was to combine the model data and the surface measurements. In that way, the diurnal variation in the boundary layer could be considered.

~~For the two selected days during the MADCAT campaign two data sets of temperature and pressure are available: surface measurements close to the measurement site and vertical profiles from ECMWF ERA-Interim re-analysis data (see Table 5). Both data sets are used to derive the O<sub>4</sub> concentration profiles for the three selected periods on both days. The general procedure is that first the temperature profiles are determined. In a second step, the pressure profiles are derived from the temperature profiles and the measured surface pressure. For the temperature profile extraction, three height layers are treated differently:~~

~~-below 1 km~~

~~Between the surface (~150 m above sea level) and 1 km, the temperature is linearly interpolated between the average of the in situ measurements of the respective period and the ECMWF data at 1 km (see next paragraph). This procedure is used to account for the diurnal variation of the temperature close to the surface. Here it is important to note that for this surface near layer the highest accuracy is required, because a) the maximum O<sub>4</sub> concentration is located near the surface, and b) the MAX-DOAS measurements are most sensitive close to the surface.~~

~~-1 km to 20 km~~

~~In this altitude range, the diurnal variation of the temperature becomes very small. Thus the average of the four ECMWF profiles of each day is used (for simplicity, a 6<sup>th</sup>-order polynomial is fitted to the ECMWF data).~~

~~-Above 20 km~~

~~In this altitude range the accuracy of the temperature profile is not critical and thus the ECMWF temperature profile for 00:00 UTC of the respective day is used for simplicity.~~

~~The temperature profiles for 8 July 2013 extracted in this way are shown in Fig. 4 (left). Close to the surface the temperature variation during the day is about 10 K.~~

~~In the next step, the pressure profiles are determined from the surface pressure (obtained from the in situ measurements) and the extracted temperature profiles according to the ideal gas law. In principle the effect of atmospheric humidity could also be taken into account, but the effect is very small for surface near layers and is thus ignored here. The derived pressure~~

450 profiles for 8 July 2013 are shown in Fig. 4 (right). Excellent agreement with the  
451 corresponding ECMWF pressure profiles is found.  
452 Here it should be noted that in principle also the ECMWF pressure profiles could be used.  
453 However, we chose to determine the pressure profiles from the surface pressure and the  
454 extracted temperature profiles, because this procedure can also be applied if no ECMWF data  
455 (or other information on temperature and pressure profiles) is available.  
456 If no profile data (e.g. from ECMWF) are available, temperature and pressure profiles can  
457 also be extrapolated from surface measurements e.g. by assuming a constant lapse rate of  
458  $-0.65 \text{ K} / 100 \text{ m}$  for the altitude range between the surface and 12 km, and a constant  
459 temperature above 12 km (as stated above, uncertainties at this altitude range have only a  
460 negligible effect on the  $\text{O}_4$  VCD). If no measurements or model data are available at all, a  
461 fixed temperature and pressure profile can be used, e.g. the US standard atmosphere (United  
462 States Committee on Extension to the Standard Atmosphere, 1976).  
463 A comparison of the ~~different~~ temperature profiles extracted by the different methods for two  
464 selected periods on both days is shown in Fig. 5. For 8 July (right), rather good agreement is  
465 found, but for 18 June (left) the agreement is worse (differences up to 20 K). Of course, the  
466 differences between the true and the US standard atmosphere profiles can become even larger,  
467 depending on location and season. So the use of a fixed temperature and pressure profile  
468 should always be the last choice. In contrast, the simple extrapolation from surface values can  
469 be very useful if no profile data are available, because the uncertainties of this method are  
470 usually smallest at low altitudes, where the bulk of  $\text{O}_4$  is located.

#### 472 4.1.2 Calculation of $\text{O}_4$ concentration profiles and $\text{O}_4$ VCDs

473  
474 From the temperature and pressure profiles the oxygen ( $\text{O}_2$ ) concentration is calculated. Here  
475 also the effect of the atmospheric humidity profiles should be taken into account (see  
476 below appendix A3), because it can have a considerable effect on the surface-near layers (at  
477 least for temperatures of about  $> 20^\circ\text{C}$ ). Finally, the square of the oxygen concentration is  
478 calculated and used as proxy for the  $\text{O}_4$  concentration (see Greenblatt et al., 1990). The  
479 uncertainties of the derived  $\text{O}_4$  concentration (and the corresponding  $\text{O}_4$  VCD) caused by the  
480 uncertainty of the input profiles is estimated by varying the input parameters (for details see  
481 appendix A3). ~~The following uncertainties are derived:~~  
482 ~~The variation of the temperature (whole profile) by about 2K leads to variations of the  $\text{O}_4$~~   
483 ~~concentration (or  $\text{O}_4$  VCD) by about 0.8%.~~  
484 ~~The variation of the surface pressure by about 3 hPa leads to variations of the  $\text{O}_4$~~   
485 ~~concentration (or  $\text{O}_4$  VCD) by about 0.7%.~~  
486 ~~The effect of uncertainties of the relative humidity depends strongly on temperature: For~~  
487 ~~surface temperatures of  $0^\circ\text{C}$ ,  $10^\circ\text{C}$ ,  $20^\circ\text{C}$ ,  $30^\circ\text{C}$ , and  $35^\circ\text{C}$  a variation of the relative humidity~~  
488 ~~of 30% leads to variations of the  $\text{O}_4$  concentration (or  $\text{O}_4$  VCDs) of about 0.15%, 0.3%, 0.6%,~~  
489 ~~1.2%, and 1.6%, respectively. If the effect of atmospheric humidity is completely ignored (dry~~  
490 ~~air is assumed), the resulting  $\text{O}_4$  concentrations (or  $\text{O}_4$  VCDs) are systematically~~  
491 ~~overestimated by about 0.3%, 0.7%, 1.3%, 2.5%, and 4% for surface temperatures of  $0^\circ\text{C}$ ,~~  
492  ~~$10^\circ\text{C}$ ,  $20^\circ\text{C}$ ,  $30^\circ\text{C}$ , and  $35^\circ\text{C}$ , respectively (assuming a relative humidity of 70%). In this~~  
493 ~~study we used the relative humidity measured by the in-situ sensors. We took these values not~~  
494 ~~only for the surface layers, but also for the whole troposphere. Here it should be noted that the~~  
495 ~~related uncertainties of the absolute humidity decrease quickly with altitude because the~~  
496 ~~absolute humidity itself decrease quickly with altitude. Since both selected days were warm or~~  
497 ~~even hot summer days, we estimate the uncertainty of the  $\text{O}_4$  concentration and  $\text{O}_4$  VCDs due~~  
498 ~~to uncertainties of the relative humidity to 1% and 0.4% on 18 June and 8 July, respectively.~~  
499 For both selected days during the MAD-CAT campaign Assuming that the uncertainties of  
500 the three input parameters are independent, the total uncertainty related to the is se factors is

501 estimated to be about 1.5% assuming that the uncertainties of the individual input  
502 parameterinput parameters are independent.

503 Further uncertainties arise from the procedure of the vertical integration of the O<sub>4</sub>  
504 concentration profiles. We tested the effect of using different vertical grids and altitude  
505 ranges. It is found that the vertical grid should not be coarser than 100 m (for which a  
506 deviation of the O<sub>4</sub> VCD of 0.3% compared to a much finer grid is found). If e.g. a vertical  
507 grid with 500 m layers is used, the deviation increases to about 1.3%. The integration should  
508 be performed over an altitude range up to 30 km. If lower maximum altitudes are used, the O<sub>4</sub>  
509 VCD will be substantially underestimated: deviations of 0.1 %, 0.5 %, and 11% are found if  
510 the integration is performed only up to 25 km, 20 km, and 10 km, respectively. Here it should  
511 be noted that the exact consideration of the altitude of the measurement site is also very  
512 important: A deviation of 50 m already leads to a change of the O<sub>4</sub> VCD by 1%. For the  
513 MAD-CAT measurements the altitude of the instruments is 150m ±20m.

514 Finally, the effects of individual extraction and integration procedures are investigated by  
515 comparing the results from different groups (see Fig. 6, and Fig. A5 in appendix A3). Except  
516 for some extreme cases, the extracted temperatures typically differ by less than 3 K below 10  
517 km. However, the deviations are typically larger for the profiles extrapolated from the surface  
518 values and in particular for the US standard atmosphere (up to > 10 K below 10 km). Also the  
519 variations of the extracted pressure profiles are in general rather small (< 1% below 10 km,  
520 except one obvious outlier). Also here the deviations of the profiles extrapolated from the  
521 surface values and especially the US standard atmosphere are much larger (up to > 5 % below  
522 10 km). The resulting deviations of the O<sub>4</sub> concentration from the different extractions are  
523 typically <3% below 10 km (and up to > 20 % below-above 10 km for the US standard  
524 atmosphere).

525 In Fig. 7 the O<sub>4</sub> VCDs calculated for the O<sub>4</sub> profiles extracted from the different groups and  
526 for the profiles extrapolated from the surface values and the US standard atmosphere are  
527 shown. The VCDs for the profiles extracted by the different groups agree within 2.5%. The  
528 deviations for the profiles extrapolated from the surface values are only slightly larger  
529 (typically within 3%), but show a large variability throughout the day, which is caused by the  
530 systematic increase of the surface temperature during the day (with temperature inversions in  
531 the morning on the two selected days). The deviations of the US standard atmosphere are up  
532 to 5% (but can of course be larger for other seasons and locations, see also Ortega et al.  
533 (2016).

534 Ultimately, the accuracy with which O<sub>4</sub> concentrations can be calculated is limited by the  
535 assumption that O<sub>4</sub> (O<sub>2</sub>-O<sub>2</sub>) is pure collision induced absorption. If the oxygen concentration  
536 profile is well known, the uncertainty due to bound O<sub>4</sub> is smaller 0.14% in Earth's atmosphere  
537 (Thalman and Volkamer, 2013).

538 Together with the uncertainties related to the input data sets, the total uncertainty of the O<sub>4</sub>  
539 VCDs determined for both selected days is estimated as 3%.

540

## 541 **4.2 Uncertainties of the O<sub>4</sub> (d)AMFs derived from radiative transfer simulations**

542

543 The most important errors of the simulated O<sub>4</sub> (d)AMFs are related to the uncertainties of the  
544 input parameters used for the simulations, in particular the aerosol properties. Further  
545 uncertainties are caused by imperfections of the radiative transfer models. These error sources  
546 are discussed and quantified in the following sub sections.

547

### 548 **4.2.1 Uncertainties of the O<sub>4</sub> (d)AMFs caused by uncertainties of the input parameters**

549

550 In this section the effect of the uncertainties of various input parameters on the O<sub>4</sub> (d)AMFs is  
551 investigated. The general procedure is that the input parameters are varied individually and

552 the corresponding changes of the O<sub>4</sub> (d)AMFs compared to the standard settings are  
553 quantified.

554 First, the effect of the O<sub>4</sub> profile shape is investigated. In contrast to the effect of the  
555 (absolute) profile shape on the O<sub>4</sub> VCD (section 4.1), here the effect of the relative profile  
556 shape on the O<sub>4</sub> AMF is investigated. The O<sub>4</sub> (d)AMFs simulated for the O<sub>4</sub> profiles extracted  
557 by the different groups (and for those derived from the US standard atmosphere and the  
558 profiles extrapolated from the surface values, see section 4.1) are compared to those for the  
559 MPIC O<sub>4</sub> profiles (using the standard settings). The corresponding ratios are shown in Fig. A6  
560 and Table A4 in appendix A4. For the O<sub>4</sub> profiles extracted by the different groups, and for  
561 O<sub>4</sub> profiles extrapolated from the surface values, small variations are found (typically < 2%).  
562 For the ~~O<sub>4</sub>-US~~ standard atmosphere larger deviations (up to 7%) are derived.

563 Next the effect of the aerosol extinction profile is investigated. In this study, aerosol  
564 extinction profiles are derived from the combined ceilometer and sun photometer  
565 measurements (see Table 5). In short, the ceilometer measurements of the attenuated  
566 backscatter are scaled by the simultaneously measured aerosol optical depth (AOD) from the  
567 sun photometer to obtain the aerosol extinction profile. Also the self-attenuation of the aerosol  
568 is taken into account. The different steps are illustrated in Fig. 8 and described in detail in  
569 appendix A5. In the extraction procedure, several assumptions have to be made: First, the  
570 ceilometer profiles have to be extrapolated for altitudes below 180 m, for which the  
571 ceilometer is not sensitive. Furthermore, they have to be averaged over several hours and are  
572 in addition vertically smoothed (above 2 km) to minimise the rather large scatter. Finally,  
573 above 5 to 6 km (depending on the ceilometer profiles) the extinction is set to zero because of  
574 the further increasing scatter and the usually small extinctions. Another assumption is that the  
575 LIDAR ratio is independent of altitude, which is typically not strictly fulfilled (the LIDAR  
576 ratio describes the ratio between the extinction and backscatter probabilities of the molecules  
577 and aerosol particles).

578 ~~Some of t~~These uncertainties are quantified by sensitivity studies, in particular the effect of  
579 the extrapolation below 180 m and the altitude above which the aerosol extinction is set to  
580 zero. Other uncertainties, like the effect of the assumption of a constant LIDAR ratio are more  
581 difficult to quantify without further information (see below). ~~While a constant LIDAR ratio is~~  
582 ~~probably a good assumption for 8 July, for 18 June the surface measurements indicate that the~~  
583 ~~aerosol properties strongly change with time. Thus the LIDAR ratio might also vary stronger~~  
584 ~~with altitude on that day.~~ The effect of temporal averaging and smoothing is probably  
585 negligible for 8 July, because similar height profiles are found for all three periods of that day,  
586 but on 18 June the effect might be more important.

587 Fig. 9 shows a comparison of the aerosol extinction profiles extracted by the different groups  
588 for the three periods on both days. Especially on 8 July systematic differences are found.  
589 They are caused by the different altitudes, above which the aerosol extinction is set to zero. In  
590 combination with the scaling of the profiles with the AOD obtained from the sun photometer,  
591 this also influences the extinction values close to the surface. Deviations up to 18% are found  
592 for the first period of 8 July. These deviations also have an effect on the corresponding O<sub>4</sub>  
593 (d)AMFs, where higher values are obtained for the profiles (INTA and IUPB 300m) which  
594 were extracted for a larger altitude range (Fig. A7 and Table A5 in the appendix A4). Here it  
595 is interesting to note that these differences are not related to the direct effect of the aerosol  
596 extinction at high altitude, but to the corresponding (via the scaling with the AOD) decrease  
597 of the aerosol extinction close to the surface. Larger deviations (up to 4%) are found for 8  
598 July, while the deviations on 18 June are within 3%.

599 In Fig. A8 and Table A6 in appendix A4, the effect of the different extrapolations of the  
600 aerosol extinction profile below 180 m on the O<sub>4</sub> (d)AMFs is quantified. Similar deviations  
601 (up to 5 %) are found for both days.

602 Finally, we investigated the effect of changing aerosol optical properties with altitude  
603 (changing LIDAR ratio). Such effects are in particular important if the wavelength of the  
604 ceilometer measurements (1020 nm) differs largely from that of the MAX-DOAS observations  
605 (360 nm). Based on the partitioning in fine and coarse mode aerosols derived from the sun  
606 photometer observations, as well as the corresponding phase functions and optical depths, the  
607 sensitivity of the ceilometer to fine mode aerosols can be estimated (for details see appendix  
608 A5). While for 18 June the contribution of the fine mode to the ceilometer signal is about 32%  
609 on 8 July it is much larger (about 82 %). Thus it can be concluded that the aerosol extinction  
610 profile derived from the ceilometer is largely representative for the fine mode aerosols on that  
611 day. Nevertheless, the remaining uncertainties of the aerosol extinction profile at 360 nm  
612 together with the assumption that the coarse aerosols are probably located close to the surface  
613 led to a repartitioning of parts of the aerosol extinction profile (extracted assuming a constant  
614 LIDAR ratio). This repartitioning led to a decrease of the aerosol extinction close to the  
615 surface which is balanced by an increase at higher altitudes (see Fig. A34). The O<sub>4</sub> dAMFs  
616 calculated for the modified profile are by about 15 % larger than those for the standard  
617 settings (for details see appendix A5).

618 The effect of elevated aerosol layers (see Ortega et al., 2016) was further investigated by  
619 systematic sensitivity studies (appendix A6). On both selected days enhanced aerosol  
620 extinction was found at elevated layers (Fig. 9). Compared to those reported by Ortega et al.  
621 (2016) the profiles extracted in this study reach even up to higher altitudes. For the  
622 investigation of the effect of changes of the aerosol extinction at different altitudes, the  
623 aerosol extinction profile on 8 July was subdivided into 3 layers (0-1.7 km; 1.7 – 4.9 km; 4.9  
624 – 7 km), and the extinction in the individual layers was increased by +20% or + 40 %. It was  
625 found that even a strong increase of the aerosol extinction at high altitudes by 40% leads only  
626 to an increase of the O<sub>4</sub> dAMFs by 7 %. Here it should be noted that on 8 July no indications  
627 for such a strong underestimation of the aerosol extinction at high altitudes are found.

628  
629 Also the effect of horizontal gradients should be briefly discussed. For the selected periods of  
630 both days, the wind direction and wind speed were rather constant. On 18 June the wind  
631 direction was between 80° and 150° with respect to North, and the wind speed was about 2  
632 m/s. On 8 July the wind direction was between 70° and 90°(the wind came from almost the  
633 same direction at which the instruments were looking), and the wind speed was about 3 m/s.  
634 During the 4 hours of the selected period on 8 July, the air masses moved over a distance of  
635 about 40 km. During the 3 hours of the selected period on 18 June, the air masses moved over  
636 a distance of about 20 km. These distances are larger than the distances for which the MAX-  
637 DOAS observations are sensitive (about 5 – 15 km). Since also the AOD and the aerosol  
638 extinction profiles were rather constant during both selected periods, we conclude that for the  
639 measurements considered here horizontal gradients can be neglected. Here it should also be  
640 noted that the discrepancies between measurements and simulations were simultaneously  
641 observed at all 4 azimuth directions.

642  
643 In Fig. A9 and Table A7 in appendix A4, the effect of different single scattering albedos  
644 (between 0.9 and 1) on the O<sub>4</sub> (d)AMFs is quantified. The effect on the O<sub>4</sub> (d)AMFs is up 4 %  
645 on 18 June and up to 2 % on 8 July 2013.

646 The impact of the aerosol phase function is investigated in two ways: First, simulation results  
647 are compared for Henyey Greenstein phase functions with different asymmetry parameters.  
648 The corresponding results are shown in Fig. A10 and Table A8 in appendix A4. The  
649 differences of the O<sub>4</sub> (d)AMFs for the different aerosol phase functions are rather strong: up  
650 to 3% for the O<sub>4</sub> AMFs and up to 8% for the O<sub>4</sub> dAMFs (larger uncertainties for the dAMFs  
651 are found because of the strong influence of the phase function on the 90° observations). Here  
652 it should be noted that the actual deviations from the true phase function might be even larger.

653 In order to better estimate these uncertainties, also simulations for phase functions derived  
654 from the sun photometer measurements based on Mie theory (in the following referred to as  
655 Mie phase functions) were performed. A comparison of these Mie phase functions with the  
656 Henyey Greenstein phase functions is shown in Fig. 10. Large differences, especially in  
657 forward direction are obvious. The  $O_4$  (d)AMFs for the Mie phase functions are compared to  
658 the standard simulations (using the HG phase function for an asymmetry parameter of 0.68) in  
659 Fig. A11 and Table A9 in Appendix A4. Again rather large deviations are found, which are  
660 larger on 18 June (up to 9 %) than on 8 July (up to 5%).

661 In Fig. A12 and Table A10 in Appendix A4, the effect of different surface albedos on the  $O_4$   
662 (d)AMFs is quantified. For the considered variations (0.03 to 0.1) the changes of the  $O_4$   
663 (d)AMFs are within 2 %.

664

#### 665 **4.2.2 Uncertainties of the $O_4$ (d)AMFs caused by imperfections of the radiative transfer** 666 **models**

667

668 The radiative transfer models used in this study are well established and showed very good  
669 agreement in several intercomparison studies (e.g. Hendrick et al., 2006; Wagner et al., 2007;  
670 Lorente et al., 2017). Nevertheless, they are based on different methods and use different  
671 approximations (e.g. with respect to the Earth's sphericity). Thus we compared the simulated  
672  $O_4$  (d)AMFs for both days in order to estimate the uncertainties associated to these  
673 differences. In Fig. A13 and Table A11 (appendix A4), the comparison results are shown.  
674 They agree within a few percent with slightly larger differences for 18 June (up to 6 %) than  
675 for 8 July (up to 3 %).

676 So far, all radiative transfer simulations were carried out without considering polarisation.  
677 Thus in Fig. A14 and Table A12 in appendix A4, the results with and without considering  
678 polarisation are compared. The corresponding differences are very small (<1%).

679

#### 680 **4.2.3 Summary of uncertainties of the $O_4$ AMF from radiative transfer simulations**

681

682 Table 9 presents an overview on the different sources of uncertainties of the simulated  $O_4$   
683 (d)AMFs derived from the comparison of the results from different groups and the sensitivity  
684 studies. The uncertainties are expressed as relative deviations from the results for the standard  
685 settings (see Table 6) derived by MPIC using MCARTIM.

686 In general, larger uncertainties are found for the  $O_4$  dAMFs compared to the  $O_4$  AMFs. This is  
687 expected because the uncertainties of the  $O_4$  dAMFs contain the uncertainties of two  
688 simulations (at 90° elevation and at low elevation). Another general finding is that the  
689 uncertainties on 18 June are larger than on 8 July. This finding is mainly related to the larger  
690 uncertainties due to the aerosol phase function, which has an especially strong forward peak  
691 on 18 June. Also the error contributions from the  $O_4$  profile extraction, the choice of the  
692 radiative transfer model and the extrapolation of the aerosol extinction below 180 m are larger  
693 on 18 June than on 8 July. These higher uncertainties are probably mainly related to the high  
694 aerosol extinction close to the surface on 18 June (see section 5.1, and appendices A2 and  
695 A5).

696 For the total uncertainties two values are given in Table 9: The 'average deviation' is the sum  
697 of all systematic deviations of the individual uncertainties (the corresponding mean of the  
698 maximum and minimum values). The second quantity (the 'range of uncertainties') is  
699 calculated from half the individual uncertainty ranges by assuming that they are independent.

700 Finally, it should be noted that for some error sources (e.g. the effects of the surface albedo or  
701 the single scattering albedo) the given numbers probably overestimate the true uncertainties,  
702 while for others, e.g. the uncertainties related to the aerosol extinction profiles or the phase  
703 functions they possibly underestimate the true uncertainties (although reasonable assumptions

704 were made). The two latter error sources are especially large for 18 June. The differences  
705 between both days are discussed in more detail in section 5.

706

### 707 **4.3 Uncertainties of the spectral analysis**

708

709 The uncertainties of the spectral analysis are caused by different effects:

710 -the specific settings of the spectral analysis like the fit window or the degree of the  
711 polynomial. Of particular interest is the effect of choosing different  $O_4$  cross sections as well  
712 as its temperature dependence.

713 -the properties (and imperfections) of the MAX-DOAS instruments

714 -the effect of different analysis software and implementations

715 -the effect of the wavelength dependence of the AMF across the fit window.

716 These error sources are discussed and quantified in the following sub sections.

717

718

#### 719 **4.3.1 Comparison of $O_4$ (d)AMFs derived from the synthetic spectra with $O_4$ (d)AMFs 720 directly obtained from the radiative transfer simulations**

721

722 Synthetic spectra for both selected days were simulated using the radiative transfer model  
723 SCIATRAN (for details see section 2.4 and Table A3 in appendix A1). While spectra for the  
724 whole day are simulated (for the viewing geometry see Table A2 in appendix A1) it should be  
725 noted that the aerosol properties during the middle periods are used also for the whole day (to  
726 minimise the computational efforts). The spectra are analysed using the standard settings and  
727 the derived  $O_4$  (d)SCDs are converted to  $O_4$  (d)AMFs using eq. 1. In addition to the spectra,  
728 also  $O_4$  (d)AMFs at 360 nm are simulated directly by the RT models using exactly the same  
729 settings. These  $O_4$  (d)AMFs are used to test whether the spectral retrieval results are indeed  
730 representative for the simulated  $O_4$  (d)AMFs at 360 nm.

731 Spectra are simulated with and without considering the temperature dependence of the  $O_4$   
732 cross section. Also one version of synthetic spectra with added random noise is processed.

733 First, the synthetic spectra are analysed using the standard settings (see Table 7). Examples of  
734 the  $O_4$  fits for synthetic (and measured) spectra are shown in Fig. 11. Here it is interesting to  
735 note that the ratios of the results for the measured spectrum and the simulated spectra are  
736 between 0.68 and 0.74, similar to ratio for the dAMFs on 8 July shown in Table 8.

737 In Fig. 12 the ratios of the  $O_4$  (d)AMFs derived from the synthetic spectra versus those  
738 directly obtained from the radiative transfer simulations at 360 nm are shown. In the upper  
739 part (a) the results for synthetic spectra considering the temperature dependence of the  $O_4$   
740 cross section are presented (without noise). Systematically enhanced ratios are found in the  
741 morning and evening, while for most of the day the ratios are close to unity. The higher  
742 values in the morning and evening are probably partly caused by the increased light paths  
743 through higher atmospheric layers (with lower temperatures) when the solar zenith angle is  
744 high. Interestingly, if the temperature dependence of the  $O_4$  cross section is not taken into  
745 account (Fig. 12 b), still slightly enhanced ratios during the morning and evening are found,  
746 which can not be explained anymore by the temperature dependence of the  $O_4$  cross section.  
747 Thus we speculate whether part of the enhanced values at high SZAs are probable caused by  
748 the wavelength dependence of the  $O_4$  AMFs. Nevertheless, for most of the day the ratio is  
749 very close to unity indicating that for  $SZA < 75^\circ$  the  $O_4$  (d)AMFs obtained from the spectral  
750 analysis are almost identical to the  $O_4$  (d)AMFs directly obtained from the radiative transfer  
751 simulations (at 360 nm).

752 In Fig. 12 c results for spectra with added random noise (without consideration of the  
753 temperature dependence of the  $O_4$  cross section) are shown. On average similar results as for  
754 the spectra without noise (Fig. 12 b) are found but the results now show a large scatter. From

755 these results and also the spectral analyses (Fig. 11) we conclude that the noise added to the  
756 synthetic spectra overestimates that of the real measurements.  
757 In Table A13 in appendix A4 the average ratios for the middle periods on both selected days  
758 are shown. They deviate from unity by up to 2% indicating that the wavelength dependence of  
759 the  $O_4$  (d)AMF is negligible for the considered cases for  $SZA < 75^\circ$ .

760

#### 761 **4.3.2 Sensitivity studies for different fit parameters**

762

763 In this section the effect of the choice of several fit parameters on the derived  $O_4$  (d)AMFs is  
764 investigated using both measured and synthetic spectra. Only one fit parameter is varied for  
765 each individual test, and the results are compared to those for the standard fit parameters (see  
766 Table 7).

767 First the fit window is varied. Besides the standard fit window (352 to 387 nm), which  
768 contains two  $O_4$  bands, also two fit windows towards shorter wavelengths are tested: 335 –  
769 374 nm (including two  $O_4$  bands) and 345 – 374 nm (including one  $O_4$  band at 360 nm). The  
770 ratios of the derived  $O_4$  (d)AMFs versus those for the standard analysis are shown in Fig. A15  
771 and Table A14 in appendix A2. On 18 June rather large deviations of the  $O_4$  (d)AMFs are  
772 found for both measured (-12%) and synthetic spectra (-5%) for the spectral range 335 to 374  
773 nm. On 8 July the corresponding differences are smaller (-6% and -2% for measured and  
774 synthetic spectra, respectively). For the spectral range 345 – 374 nm, smaller differences of  
775 only up to 1% are found for both days. The reason for the larger deviations on 18 June for the  
776 spectral range 335 – 374 nm is not clear. One possible reason could be the differences of the  
777 Ångström parameters (see Fig. 1) and phase functions (see Fig 10).

778 In Fig. A16 and Table A15 the results for different degrees of the polynomial used in the  
779 spectral analysis are shown. For the measured spectra systematically higher  $O_4$  (d)AMFs (up  
780 to 6%) than for the standard analysis are found when using lower polynomial degrees. For the  
781 synthetic spectra the effect is smaller (<3%).

782 In Fig. A17 and Table A16 the results for different intensity offsets are shown. Again, for the  
783 measured spectra systematically higher  $O_4$  (d)AMFs (up to 16%) than for the standard  
784 analysis are found when reducing the order of the intensity offset, while for the synthetic  
785 spectra the effect is smaller (<3%). Higher order intensity offsets might compensate for  
786 wavelength dependent offsets (e.g. spectral straylight), which can be important for real  
787 measurements, while the synthetic spectra do not contain such contributions.

788 In Fig. A18 and Table A17 the results for spectral analyses with only one Ring spectrum are  
789 shown. In contrast to the standard analysis, which includes two Ring spectra (one for clear  
790 and one for cloudy sky, see Wagner et al., 2009), only the Ring spectrum for clear sky is used.  
791 For both selected days, only small deviations (within 2%) compared to the standard analysis  
792 are found.

793

#### 794 **4.3.3 Sensitivity studies using different trace gas absorption cross sections**

795

796 In this section the impact of different trace gas absorption cross sections on the derived  $O_4$   
797 (d)AMFs is investigated.

798 In Fig. A19 and Table A18 the results for using two  $NO_2$  cross sections (294 and 220 K)  
799 compared to the standard analysis (using only a  $NO_2$  cross section for 294 K) are shown. The  
800 results are almost the same as for the standard analysis.

801 In Fig. A20 and Table A19 the results for using an additional wavelength-dependent  $NO_2$   
802 cross section compared to the standard analysis (using only one  $NO_2$  cross section) are shown.  
803 The second  $NO_2$  cross section is calculated by multiplying the original cross section with  
804 wavelength (Pukite et al., 2010). Again, only small deviations of the results from the standard  
805 analysis (1% for the measured spectra, and 2% for the synthetic spectra) are found.



806 In Fig. A21 and Table A20 results for using and additional wavelength-dependent O<sub>4</sub> cross  
807 sections compared to the standard analysis (using only one O<sub>4</sub> cross section) are shown. The  
808 second O<sub>4</sub> cross section is calculated like for NO<sub>2</sub>, but also an orthogonalisation with respect  
809 to the original O<sub>4</sub> cross section (at 360 nm) is performed. The derived O<sub>4</sub> (d)AMFs are almost  
810 identical to those from the standard analysis (within 1%).

811 For the spectral retrieval of HONO in a similar spectral range, a significant impact of water  
812 vapour absorption around 363 nm was found in Wang et al. (2017c) and Lampel et al. (2017).  
813 In Fig. A22 and Table A21 the O<sub>4</sub> results for including a H<sub>2</sub>O cross section (Polyansky et al.,  
814 2018) compared to the standard analysis (using no H<sub>2</sub>O cross section) are shown. The results  
815 are almost identical to those from the standard analysis (within 1%).

816 In Fig. A23 and Table A22 the results for including a HCHO cross section (Polyansky et al.,  
817 2018) compared to the standard analysis (using no HCHO cross section) are shown.  
818 Especially for 18 June a large systematic effect is found: the O<sub>4</sub> dAMFs are by 4 % or 6 %  
819 smaller than for the standard analysis for measured and synthetic spectra, respectively. On 8  
820 July the underestimation is smaller (2% and 3% for measured and synthetic spectra,  
821 respectively).

822

#### 823 **4.3.4 Effect of using different O<sub>4</sub> cross sections**

824

825 In Fig. A24 and Table A23 the results for different O<sub>4</sub> cross sections are compared to the  
826 standard analysis (using the Thalman O<sub>4</sub> cross section). The results for both days are almost  
827 identical. For the real measurements, the derived O<sub>4</sub> dAMFs using the Hermans and  
828 Greenblatt cross sections are by 3% smaller or 8 % larger than those for the standard analysis,  
829 respectively. However, if the Greenblatt O<sub>4</sub> cross section is allowed to shift during the  
830 spectral analysis, the overestimation can be largely reduced to only +3 %. This confirms  
831 findings from earlier studies (e.g. Pinardi et al., 2013) that the wavelength calibration of the  
832 original data sets is not very accurate.

833 For the synthetic spectra slightly different results than for the real measurements are found for  
834 the Hermans O<sub>4</sub> cross section. The reason for these differences is not clear. However, here it  
835 should be noted that the temperature dependent O<sub>4</sub> absorption in the synthetic spectra does  
836 probably not exactly represent the true atmospheric O<sub>4</sub> absorption.

837

#### 838 **4.3.5 Effect of the temperature dependence of the O<sub>4</sub> cross section**

839

840 The new set of O<sub>4</sub> cross sections provided by Thalman and Volkamer (2013) allows to  
841 investigate the temperature dependence of the atmospheric O<sub>4</sub> absorptions in detail. They  
842 provide O<sub>4</sub> cross sections measured at five temperatures (203, 233, 253, 273, 293 K) covering  
843 the range of temperatures relevant for atmospheric applications. Using these cross sections,  
844 the effect of the temperature dependence of the O<sub>4</sub> absorptions is investigated in two ways:

845 a) In a first test, synthetic spectra are simulated for different surface temperatures assuming a  
846 fixed lapse rate. These spectra are then analysed using the O<sub>4</sub> cross section for 293K (which is  
847 usually used for the spectral analysis of O<sub>4</sub>). From this study the magnitude of the effect of the  
848 temperature dependence of the O<sub>4</sub> cross section on MAX-DOAS measurements can be  
849 quantified.

850 b) In a second test, measured and synthetic spectra for both selected days are analysed with  
851 O<sub>4</sub> cross sections for different temperatures. From this study it can be seen to which degree  
852 the temperature dependence of the O<sub>4</sub> cross section can be already corrected during the  
853 spectral analysis (if two O<sub>4</sub> cross sections are used simultaneously).

854 For the first study, MAX-DOAS spectra are simulated in a simplified way:

855 -Atmospheric temperature profiles are constructed for surface temperatures between 220 K  
856 and 310 K in steps of 10 K assuming a fixed lapse rate of  $-0.656 \text{ K} / 100 \text{ m}$ .

857 -For each altitude layer (vertical extension: 20 m below 500m, 100 m between 500 m and 2  
858 km, 200 m between 2 km and 12 km, 1 km above) the O<sub>4</sub> concentrations (calculated from the  
859 US standard atmosphere) are multiplied with the corresponding differential box-AMFs  
860 calculated for typical atmospheric conditions and viewing geometries (see Fig. A25 in  
861 appendix A4).

862 -High resolution absorption spectra are calculated by applying the Beer-Lambert-law for each  
863 height layer using the O<sub>4</sub> cross section of the respective temperature (interpolated between the  
864 two adjacent temperatures of the Thalman and Volkamer data set).

865 -The derived high resolution spectra are convolved with the instrument slit function (FWHM  
866 of 0.6 nm).

867 -The logarithm of the ratio of the spectra for the low elevation and zenith is calculated and  
868 analysed using the O<sub>4</sub> cross section for 293 K.

869 -The derived O<sub>4</sub> dAMFs are divided by the corresponding dAMFs directly obtained from the  
870 radiative transfer simulations.

871 These calculated ratios as function of the surface temperature are shown in Fig. 13. A strong  
872 and systematic dependence on the surface temperature is found (15 % for a change of the  
873 surface temperature between 240 and 310 K). However, except for measurements at polar  
874 regions, the deviations are usually small. Since for both selected days the temperatures were  
875 rather high (indicated by the two coloured horizontal bars in the figure), the effect of the  
876 temperature dependence of the O<sub>4</sub> absorption for the middle periods of both days is very small  
877 (-1 to -2% for 18 June, and 0 to +1% on 8 July). It should be noted that the results shown in  
878 Fig. 13 are obtained for generalised settings of the radiative transfer simulations. Thus it is  
879 recommended that future studies should investigate the effect of the temperature dependence  
880 in more detail and using the exact viewing geometry for individual observations. However,  
881 since the temperatures on both selected days were rather high, for this study the  
882 simplifications of the radiative transfer simulations have no strong influence on the derived  
883 results.

884 In the second test the measured and synthetic spectra are analysed using O<sub>4</sub> cross sections for  
885 different temperatures. The corresponding results are shown in Fig. A26 and Table A24.

886 If only the O<sub>4</sub> cross section at low temperature (203 K) is used, the derived O<sub>4</sub> AMFs and  
887 dAMFs are by about 16% and 30% smaller than for the standard analysis (using the O<sub>4</sub> cross  
888 section for 293 K). These results are consistently obtained for the measured and synthetic  
889 spectra. If, however, two O<sub>4</sub> cross sections (for 203 and 293 K) are simultaneously included in  
890 the analysis, different results are obtained for the measured and synthetic spectra: for the  
891 measured spectra the derived O<sub>4</sub> (d)AMFs agree within 4% with those from the standard  
892 analysis. In contrast, for the synthetic spectra, the derived O<sub>4</sub> (d)AMFs are systematically  
893 smaller (by about 6 to 18 %). This finding was not expected, because exactly the same cross  
894 sections were used for both the simulation and the analysis of the synthetic spectra. Detailed  
895 investigations (see appendix A4) led to the conclusion that there is a slight inconsistency in  
896 the temperature dependence of the O<sub>4</sub> cross sections from Thalman et al. (2013): The ratio of  
897 the peak values of the cross section at 360 and 380 nm changes in a non-continuous way  
898 between 253 and 223 K (see Fig. A27 in appendix A4). The reason for this inconsistency is  
899 currently not known. If these two O<sub>4</sub> bands are included in the spectral analysis (as for the  
900 standard settings), the convergence of the spectral analysis strongly depends on the ability to  
901 fit both O<sub>4</sub> bands well. Thus the fit results for both O<sub>4</sub> cross sections are mainly determined by  
902 the relative strengths of both O<sub>4</sub> bands (see Fig. A27 in appendix A4). If instead a smaller  
903 wavelength ranges is used containing only one absorption band (345 – 374 nm), the derived  
904 O<sub>4</sub> (d)AMFs are in rather good agreement with the results of the analysis (using only the O<sub>4</sub>  
905 cross section for 293 K), see Table A25 in appendix A4. In that case, the convergence of the  
906 fit mainly depends on the temperature dependence of the line width. It should be noted that  
907 the non-continuous temperature dependence of the O<sub>4</sub> absorption cross section only affects

908 the analysis of the synthetic spectra, because for the simulation of the spectra all O<sub>4</sub> cross  
909 sections for temperatures between 223 and 293 K were used. For the measured spectra, no  
910 problems are found, because in the spectral analysis only the O<sub>4</sub> cross sections for 223 and  
911 293 K were used.

912 In Fig. A28 in appendix A4 the ratios of both fit coefficients (for 203 and 293 K) as well as  
913 the derived effective temperatures for the analyses of measured and synthetic spectra are  
914 shown. For the measured spectra the ratios are close to zero and the derived temperatures are  
915 close to 300K for most of the time (except in early morning and evening), because the  
916 effective atmospheric temperature for both days is close to the temperature of the high  
917 temperature O<sub>4</sub> cross section (293 K) (see Fig. 13). Similar results (at least around noon) are  
918 also obtained for the synthetic spectra if the narrow spectral range (345 – 374 nm) is used. For  
919 the standard fit range (including two O<sub>4</sub> bands), however, the ratios are much higher again  
920 indicating the effect of the inconsistency of the temperature dependence of the O<sub>4</sub> cross  
921 sections (see Fig. A27 in appendix A4).

922

#### 923 4.3.6 Results from different instruments and analyses by different groups

924

925 In this section the effects of using measurements from different instruments and having these  
926 spectra analysed by different groups are investigated. For that purpose three different  
927 procedures are followed: First, MPIC spectra are analysed by other groups; second, the  
928 spectra from other instruments are analysed by MPIC~~non-MPIC instruments are analysed by~~  
929 ~~the respective group~~; third, the spectra from non-MPIC instruments~~other instruments~~ are  
930 analysed by the respective group~~by MPIC~~.

931 In Fig. 14a and Table A25 (in appendix A4) the comparison results of the analysis of MPIC  
932 spectra by other groups versus the analysis of MPIC spectra by MPIC are shown. Especially  
933 for 18 June rather large differences (between –6% / +5%) to the MPIC standard analysis are  
934 found. Interestingly the largest differences are found in the morning when the aerosol  
935 extinction close to the surface was strongest. On 8 July smaller differences (between –6% and  
936 –1%) are found.

937 In Fig. 14b and Table A25 (in appendix A4) the comparison results of the analysis of spectra  
938 from other instruments by MPIC versus the analysis of MPIC spectra by MPIC are shown.  
939 For this comparison all analyses are performed in the spectral range 335 – 374 nm, because  
940 the standard spectral range (352 – 387 nm) is not covered by all instruments. Again, the  
941 largest differences are found for 18 June (up to ±11%). For 8 July the differences reach up to  
942 ±6%, but for this day only a few measurements in the morning are available.

943 In Fig. 14c and Table A25 (in appendix A4) the comparison results of the analysis of spectra  
944 from other instruments by the respective group versus the MPIC analysis by MPIC (standard  
945 analysis) is shown. From this exercise the combined effects of different instrumental  
946 properties and retrievals can be estimated. Interestingly, the observed differences are only  
947 slightly larger than those for the analysis of the spectra from the different instruments by  
948 MPIC (Fig. 14b). This indicates that the largest errors are related to the differences of the  
949 different instruments and not to the settings and implementations of the different retrievals.  
950 For the middle period of 18 June the uncertainties are within 12%. This range is also assumed  
951 for 8 July. Here it is interesting to note that the derived errors of the spectral analysis are  
952 probably not representative for most recent measurement campaigns. For example, during the  
953 CINDI-2 campaign (<http://www.tropomi.eu/data-products/cindi-2>) the deviations of the O<sub>4</sub>  
954 spectral analysis results were much smaller than for the selected days during the MAD-CAT  
955 campaign.

956

#### 957 4.3.7 Summary of uncertainties of the O<sub>4</sub> AMF from the spectral analysis

958

959 Table 10 presents an overview on the different sources of uncertainties of the measured O<sub>4</sub>  
960 (d)AMFs obtained in the previous sub-sections. The uncertainties are expressed as relative  
961 deviations from the results for the standard settings (see Table 7) derived by MPIC from  
962 spectra of the MPIC instrument

963 Like for the simulation results, in general, larger uncertainties are found for the O<sub>4</sub> dAMFs  
964 compared to the O<sub>4</sub> AMFs. This is expected because the uncertainties of the O<sub>4</sub> dAMFs  
965 contain the uncertainties of two analyses (at 90° elevation and at low elevation). Also, the  
966 uncertainties on 18 June are again larger than on 8 July. This finding was not expected, but is  
967 possibly related to the higher trace gas abundances (see Fig. 1 and Table A3 in appendix A1)  
968 and the higher aerosol extinction close to the surface on 18 June.

969 Another interesting finding is that the uncertainties of the spectral analysis of O<sub>4</sub> are  
970 dominated by the effect of instrumental properties up to ±12% in the morning of 18 June.  
971 Further important uncertainties are associated with the choice of the wavelength range, the  
972 degree of the polynomial and the intensity offset. In contrast, the exact choices of the trace  
973 gas cross sections (including their wavelength- and temperature dependencies) play only a  
974 minor role (up to a few percent). Excellent agreement (within ±1%) is in particular found for  
975 the O<sub>4</sub> analysis of the synthetic spectra using the standard settings and the directly simulated  
976 O<sub>4</sub> (d)AMFs at 360 nm. This indicates that the O<sub>4</sub> (d)AMFs retrieved in the wavelength range  
977 352 – 387 nm are indeed representative for radiative transfer simulations at 360 nm.

978 As for the uncertainties of the simulated O<sub>4</sub> (d)AMFs, the uncertainties of the spectral  
979 analysis are also split into a systematic and a random term: the systematic deviations of the O<sub>4</sub>  
980 dAMFs from those of the standard settings are about +1% and –1.5% for 18 June and 8 July,  
981 respectively. The range of uncertainty is calculated from the uncertainty ranges of the  
982 different error sources by assuming that they are all independent. The uncertainty ranges for  
983 18 June and 8 July are calculated as ±12.5% and ±10.8%, respectively.

984

#### 985 **4.4 Recommendations derived from the sensitivity studies**

986

987 In this section a short summary of the most important findings from the sensitivity studies is  
988 given.

989

#### 990 **Temperature and pressure profiles**

991 Temperature and pressure profiles from sondes or model data should be used if available.  
992 Alternatively, of temperature and pressure profiles extrapolated from surface measurements  
993 could be used. Typical uncertainties of the O<sub>4</sub> VCD derived from such profiles are still < 2%.  
994 For high temperature (>20°C) the atmospheric humidity should be considered. If no  
995 measurements are available, prescribed profiles, e.g. from the US standard atmosphere can be  
996 used. However, depending on location and season the errors of the resulting O<sub>4</sub> VCD can be  
997 rather large (see also Ortega et al., 2016).

998

#### 999 **Integration of the O<sub>4</sub> VCD**

1000 The integration should be performed on a vertical grid with at least 100 m resolution up to an  
1001 altitude of 30 km. The surface altitude should be taken into account with an accuracy of at  
1002 least 20 m.

1003

#### 1004 **Measurements and spectral analysis**

1005 Instruments should have a small FOV (≤1°), an accurate elevation calibration (better than  
1006 0.5°), and a small and preferably well characterized stray light level. For the data analysis the  
1007 standard settings as provided in Table 7 should be used. From the analysis of synthetic spectra  
1008 it was found that the results for these settings are consistent with simulated O<sub>4</sub> (d)AMFs  
1009 within 1 %.

1010  
1011  
1012  
1013  
1014  
1015  
1016  
1017  
1018  
1019  
1020  
1021  
1022  
1023  
1024  
1025  
1026  
1027  
1028  
1029  
1030  
1031  
1032  
1033  
1034  
1035  
1036  
1037  
1038  
1039  
1040  
1041  
1042  
1043  
1044  
1045  
1046  
1047  
1048  
1049  
1050  
1051  
1052  
1053  
1054  
1055  
1056  
1057  
1058  
1059

### **Information on aerosols**

Aerosol profiles should be obtained from LIDARs or ceilometers using similar wavelengths as the MAX-DOAS measurements. Preferred LIDAR types are HSRL or Raman LIDARs, which directly provide profiles of aerosol extinction and thus need no assumptions on the LIDAR ratio. They should also have high signal to noise ratios and shallow blind region at the surface in order to cover a large altitude range. Information on aerosol optical properties and size distributions from sun photometers or in situ measurements should be used.

### **RTM simulations**

Radiative transfer models should use Mie phase functions e.g. derived from sun photometer observations. The consideration of polarisation and rotational Raman scattering is not necessary.

If such optimised settings are used, the errors of the radiative transfer simulations and spectral analysis can be largely reduced: the uncertainties of the  $O_4$  dAMFs related to radiative transfer simulations can be reduced from about  $\pm 8\%$  as in this study to about  $\pm 4\%$ ; those related to the spectral analysis can be reduced from about  $\pm 10\%$  to about  $\pm 6\%$ .

### **4.4.1 Preferred scenarios for future studies**

In addition to the recommendations given above, future campaigns should aim to cover different meteorological conditions (e.g. low temperatures), viewing geometries (e.g. low SZA), surface albedos (e.g. snow and ice) and wavelengths (e.g. 477, 577, and 630 nm). Also different aerosol scenarios including those with low aerosol optical depths should be covered. Max-DOAS measurements should be performed by at least 2, preferably more instruments. In order to minimise the effects of instrumental properties, the instruments should be well calibrated and should have low straylight levels. Based on the above criteria, measurements during the CINDI-2 campaign are probably well suited for a similar study.

## **5 Comparison of measurements and simulations**

The comparison results for both days are different: On 18 June (except in the evening) measurements and simulations agree within errors (the ratio of simulated and measured  $O_4$  dAMFs for the middle period of that day is  $1.01 \pm 0.16$ ). In contrast, on 8 July measurements and simulations significantly disagree: Taking into account the errors of the VCD calculation (3%), the radiative transfer simulations ( $+16 \pm 6.4\%$ ) and the spectral analysis ( $-1.5 \pm 10.8\%$ ) for the middle period of that day results in a ratio of simulated and measured  $O_4$  dAMFs of  $0.81 \pm 0.10$ , which differs significantly from unity.

### **5.1 Important differences between both days**

On both selected days similar aerosol AOD were measured. Also the diurnal variation of the SZA was similar because of the proximity to summer solstice. However, also many differences are found for the two days, which are discussed below.

a) temperature, pressure, wind:

1060 On 18 June surface pressure was lower by about 13 hPa and surface temperature was higher  
1061 by about 7K than on 8 July, respectively. These differences were explicitly taken into account  
1062 in the calculation of the O<sub>4</sub> profiles / VCDs, the radiative transfer simulations and the  
1063 interpretation of the spectral analyses. Thus they can very probably not explain the different  
1064 comparison results on the two days.

1065 On both days, wind was mainly blowing from East-North-East, but on 18 June it was blowing  
1066 from West before about 08:00 and after 20:00 UTC. Wind speeds were lower on 18 June  
1067 (between 1 and 2 m/s) than on 8 July (between 1 and 3 m/s).

1068

1069 b) aerosol properties:

1070 The in situ aerosol measurements show very different abundances and properties of aerosols  
1071 close to the ground for the selected days. On 18 June much larger concentrations of larger  
1072 aerosol particles are found, which cannot be measured by the ceilometer, because the lowest  
1073 detecting altitude is 180m. Thus it can be concluded that the enhanced aerosol concentration  
1074 on 18 June is confined to a shallow layer at the surface. In general the aerosol concentrations  
1075 close to the surface are more variable on 18 June than on 8 July. The high aerosol  
1076 concentrations close to the surface probably also affect the LIDAR ratio, which is thus  
1077 probably more variable on 18 June. Similarly, also the phase function derived from the sun  
1078 photometer (for the integrated aerosol profile) is probably less representative for the low  
1079 elevation angles on 18 June because different aerosol size distributions probably existed at  
1080 different altitudes. Finally, the Ångström parameter derived from AERONET observations is  
1081 different for both days, especially for large wavelengths, which is in qualitative agreement  
1082 with the higher in situ aerosol concentrations of large particles on 18 June. Also a larger  
1083 forward peak of the derived aerosol phase function is found for 18 June. Both effects probably  
1084 cause larger uncertainties on 18 June.

1085

1086 c) spectral analysis

1087 Larger uncertainties of the spectral analysis are found for 18 June compared to 8 July. This  
1088 finding was surprising, but was also partly reproduced by the analysis of the synthetic spectra.  
1089 One possible explanation is the smaller wavelength dependence of aerosol scattering at low  
1090 altitudes on 18 June, which mainly affects measurements at low elevation angles. When  
1091 analysed versus a zenith reference, for which the broad band wavelength dependency is much  
1092 stronger (because of the larger contribution from Rayleigh scattering), larger deviations can  
1093 be expected (e.g. because of differences of instrumental straylight, or the different detector  
1094 saturation levels). On 18 June also higher (about doubled) NO<sub>2</sub> and HCHO concentrations are  
1095 present compared to 8 July possibly leading to increased spectral interferences with the O<sub>4</sub>  
1096 absorption, but this effect is expected to be small.

1097

1098

1099 **5.2 Which conditions would be needed to bring measurements and simulations on 8 July**  
1100 **into agreement**

1101

1102 This section describes possible (but mostly unrealistic) changes of the atmospheric scenario,  
1103 the instrument properties or the input parameters, which could bring measurements and  
1104 simulations on 8 July into agreement. If e.g. the aerosol extinction profile is scaled by 0.65,  
1105 the corresponding O<sub>4</sub> dAMFs would almost perfectly match the measured ones. In principle  
1106 also horizontal gradients of the aerosol extinction could explain the discrepancy. While we are  
1107 not able to quantify them, they surely would have to be of the order of several ten percent per  
1108 10 km. Another possibility would be aerosol phase functions with very high asymmetry  
1109 parameters (>> 0.75). Also systematic errors of the O<sub>4</sub> cross section could explain the  
1110 observed discrepancies. Finally, an overcorrection of spectrograph straylight (or any other

1111 intensity offset) could be explain the discrepancies. However, a rather high overcorrection (by  
1112 about 20%) would be needed.

## 1116 ~~5-6 Discussion and e~~Conclusions

1117  
1118 We compared MAX-DOAS observations of the atmospheric O<sub>4</sub> absorption with  
1119 corresponding radiative transfer simulations for two mainly cloud-free days during the MAD-  
1120 CAT campaign. A large part of this study is dedicated to the extraction of input information  
1121 for the radiative transfer simulations and the quantification of the associated errors of the  
1122 radiative transfer simulations and spectral retrievals. One important result was from the  
1123 sensitivity studies is that the O<sub>4</sub> results derived from the analysis of synthetic spectra using the  
1124 standard settings are consistent with the simulated O<sub>4</sub> air mass factors within 1%. Also  
1125 recommendations for the settings of the radiative transfer simulations, in particular on the  
1126 extraction of aerosol and O<sub>4</sub> profiles are given. One important result is that the quality of the  
1127 aerosol data sets is crucial to constrain the radiative transfer simulations. For example, it is  
1128 recommended that LIDAR instruments are operated at wavelengths close to those of the  
1129 MAX-DOAS measurement and have a small sensitivity gap close to the surface. Further  
1130 aerosol properties (e.g. size distributions, phase functions) should be available from sun  
1131 photometer and/or in situ measurements. If such aerosol data are available the corresponding  
1132 uncertainties of the radiative transfer simulations could be largely reduced to about ±5%.  
1133 Similar uncertainties can also be expected for optimum instrument operations and data  
1134 analyses.

1135 The comparison results for both days are different: On 18 June (except in the evening)  
1136 measurements and simulations agree within errors (the a ratio of simulated and measured O<sub>4</sub>  
1137 dAMFs for the middle period of that day is  $1.01 \pm 0.16$ ). In contrast, on 8 July measurements  
1138 and simulations significantly disagree: Taking into account the errors of the VCD calculation  
1139 (3%), the radiative transfer simulations ( $\pm 16 \pm 6.41\%$ ) and the spectral analysis ( $-1.5 \pm 10.8\%$ )  
1140 for the middle period of that day results in a ratio of simulated and measured O<sub>4</sub> dAMFs of  
1141  $0.71-81 \pm 0.12-10$ , which differs significantly from unity. No plausible explanation for the  
1142 observed discrepancies on 8 July were found.

1143 ~~On 18 June larger uncertainties both for the measurements and radiative transfer simulations~~  
1144 ~~exist, mainly related to the high aerosol concentration close to the surface. A summary of the~~  
1145 ~~most important differences between both days is given in section 5.1.~~

1146 ~~A large part of this study was dedicated to the extraction of input information for the radiative~~  
1147 ~~transfer simulations and to the quantification of the errors of the radiative transfer simulations~~  
1148 ~~and spectral retrievals. In particular, the analysis of synthetic spectra indicated that the O<sub>4</sub>~~  
1149 ~~results derived from the spectral analysis using the standard settings are consistent with the~~  
1150 ~~simulated O<sub>4</sub> air mass factors within 1%.~~

1151 ~~Based on this study, also recommendations for similar future studies are derived (see section~~  
1152 ~~5.2). In general, the largest errors sources arise from spectral analyses (partly related to~~  
1153 ~~imperfections of the MAX-DOAS instruments) and the uncertainties of the aerosol phase~~  
1154 ~~functions and extinction profiles. Even if the aerosol extinction profiles could be better~~  
1155 ~~constraint, e.g. using results from Raman LIDARs or high spectral resolution LIDARs~~  
1156 ~~(HSRL), the uncertainties of the aerosol phase function will remain a critical error source.~~  
1157 ~~Future measurements should in particular try to minimize these error sources. Here it should~~  
1158 ~~be noted that the general larger errors obtained for 18 June are probably not representative for~~  
1159 ~~typical measurement conditions. For example, during the CINDI 2 campaign~~  
1160 ~~(<http://www.tropomi.eu/data-products/cindi-2>) the deviations of the O<sub>4</sub> spectral analysis~~  
1161 ~~results were much smaller than those for 18 June.~~

1162 ~~The main conclusion from this study is that on one of the two selected days during the~~  
1163 ~~MADCAT campaign (08 July) a scaling factor (of about  $0.71 \pm 0.12$ ) is needed to bring~~  
1164 ~~measurements and forward model into agreement.~~ As long as the reason for this deviation is  
1165 not understood, it is, however, unclear, how representative these findings are for other  
1166 measurements (e.g. from other platforms, at other locations/seasons, for other aerosol loads,  
1167 and other wavelengths). Thus further studies spanning a large variety of measurement  
1168 conditions and also including other wavelengths are recommended.

1169

1170

### 1171 **5.1 Important differences between both days**

1172

1173 ~~On both selected days similar aerosol AOD were measured. Also the diurnal variation of the~~  
1174 ~~SZA was similar because of the proximity to summer solstice. However, also many~~  
1175 ~~differences are found for the two days, which are discussed below.~~

1176

1177 a) temperature, pressure, wind:

1178 ~~On 18 June surface pressure was lower by about 13 hPa and surface temperature was higher~~  
1179 ~~by about 7K than on 8 June, respectively. These differences were explicitly taken into account~~  
1180 ~~in the calculation of the  $O_4$  profiles / VCDs, the radiative transfer simulations and the~~  
1181 ~~interpretation of the spectral analyses. Thus they can very probably not explain the different~~  
1182 ~~comparison results on the two days.~~

1183 ~~On both days, wind was mainly blowing from East North East, but on 18 June it was blowing~~  
1184 ~~from West before about 08:00 and after 20:00 UTC. Wind speeds were lower on 18 June~~  
1185 ~~(between 1 and 2 m/s) than on 8 July (between 1 and 3 m/s).~~

1186

1187 b) aerosol properties:

1188 ~~The in situ aerosol measurements show very different abundances and properties of aerosols~~  
1189 ~~close to the ground for the selected days. On 18 June much larger concentrations of larger~~  
1190 ~~aerosol particles are found, which cannot be measured by the ceilometer, because the lowest~~  
1191 ~~detecting altitude is 180m. Thus it can be concluded that the enhanced aerosol concentration~~  
1192 ~~on 18 June is confined to a shallow layer at the surface. In general the aerosol concentrations~~  
1193 ~~close to the surface are more variable on 18 June than on 8 July. The high aerosol~~  
1194 ~~concentrations close to the surface probably also affect the LIDAR ratio, which is thus more~~  
1195 ~~variable on 18 June. Since a constant LIDAR ratio is used for the extraction of the aerosol~~  
1196 ~~extinction profiles, also the uncertainties of the aerosol profile are probably larger on 18 June.~~  
1197 ~~Similarly, also the phase function derived from the sun photometer (for the integrated aerosol~~  
1198 ~~profile) is probably less representative for the low elevation angles on 18 June because~~  
1199 ~~different aerosol size distributions probably existed at different altitudes. Finally, the~~  
1200 ~~Ångström parameter derived from AERONET observations is different for both days,~~  
1201 ~~especially for large wavelengths, which is in qualitative agreement with the higher in situ~~  
1202 ~~aerosol concentrations of large particles on 18 June. Also a larger forward peak of the derived~~  
1203 ~~aerosol phase function is found for 18 June. Both effects probably cause larger uncertainties~~  
1204 ~~on 18 June.~~

1205

1206 e) spectral analysis

1207 ~~Larger uncertainties of the spectral analysis are found for 18 June compared to 8 July. This~~  
1208 ~~finding was surprising, but was also partly reproduced by the analysis of the synthetic spectra.~~  
1209 ~~One possible explanation is the smaller wavelength dependence of aerosol scattering at low~~  
1210 ~~altitudes on 18 June, which mainly affects measurements at low elevation angles. When~~  
1211 ~~analysed versus a zenith reference, for which the broad band wavelength dependency is much~~  
1212 ~~stronger (because of the larger contribution from Rayleigh scattering), larger deviations can~~



1213 ~~be expected (e.g. because of differences of instrumental straylight, or the different detector~~  
1214 ~~saturation levels). On 18 June also higher (about doubled) NO<sub>2</sub> and HCHO concentrations are~~  
1215 ~~present compared to 8 July possibly leading to increased spectral interferences with the O<sub>4</sub>~~  
1216 ~~absorption, but this effect is expected to be small.~~

## 1219 **5.2 Recommendations**

1220  
1221 ~~Based on the findings of this comparison study, recommendations for similar future studies~~  
1222 ~~are derived. Part of them are also of interest for the interpretation of O<sub>4</sub> measurements in~~  
1223 ~~general.~~

### 1225 ~~a) VCD calculation~~

1226 ~~Temperature and pressure profiles representative for individual days should be used. If such~~  
1227 ~~profiles are not available, also profiles extrapolated from surface measurements can be used.~~  
1228 ~~They are not ‘perfect’ but usually the associated errors are at the percent level. The vertical~~  
1229 ~~grid for the integration of the O<sub>4</sub> profile should not be coarser than 100m. The integration~~  
1230 ~~should be carried out up to an altitude of at least 30 km. The exact height of the instrument~~  
1231 ~~position needs to be taken into account.~~

### 1233 ~~b) Radiative transfer simulations~~

1234 ~~If available appropriate phase functions (e.g. from Mie calculations) should be used. Here it is~~  
1235 ~~important to note that even if appropriate asymmetry parameters are available, the often used~~  
1236 ~~HG parameterisation becomes very imprecise for forward scattering geometries.~~

### 1238 ~~e) Spectral analysis~~

1239 ~~The spectral range should cover the two O<sub>4</sub> bands at 360 and 380 nm. An intensity offset~~  
1240 ~~should be included in the analysis. If the surface temperature differs strongly (more than 25K)~~  
1241 ~~from 300K the effect of the temperature dependence of the O<sub>4</sub> absorption should be~~  
1242 ~~considered.~~

### 1244 ~~d) Preferred scenarios for future studies~~

1245 ~~In particular the uncertainties related to aerosols should be minimised. For example,~~  
1246 ~~measurements at rather low AOD ( $\leq 0.1$ ) and with low temporal variability should be selected.~~  
1247 ~~Aerosol profiles should be derived from LIDARs/ceilometers which are sensitive down to very~~  
1248 ~~shallow altitudes (low overlap ranges). If possible, Raman LIDARs or high spectral~~  
1249 ~~resolution LIDARs (HSRL) should be used, because from such observations the aerosol~~  
1250 ~~extinction profile can be derived without the assumption of a LIDAR ratio. Also sun~~  
1251 ~~photometer measurements should be available. Besides AOD and the Ångström parameter~~  
1252 ~~also information on the phase function and single scattering albedo from these measurements~~  
1253 ~~should be used.~~

1254 ~~It would be interesting to cover other meteorological conditions (e.g. low temperatures),~~  
1255 ~~viewing geometries (e.g. low SZA), surface albedos (e.g. snow and ice) and wavelengths (e.g.~~  
1256 ~~477, 577, and 630 nm).~~

1257 ~~In order to minimise the effects of instrumental properties, the instruments should be well~~  
1258 ~~calibrated and should have low straylight levels. At least two instruments should be operated~~  
1259 ~~at the same site. Based on the above criteria, measurements during the CINDI-2 campaign are~~  
1260 ~~probably well suited for a similar study.~~

## 1263 **Acknowledgments**

1264  
 1265  
 1266  
 1267  
 1268  
 1269  
 1270  
 1271  
 1272  
 1273  
 1274  
 1275  
 1276  
 1277  
 1278  
 1279  
 1280  
 1281  
 1282  
 1283  
 1284  
 1285  
 1286  
 1287  
 1288  
 1289  
 1290  
 1291  
 1292  
 1293  
 1294  
 1295  
 1296  
 1297  
 1298  
 1299

We are thankful for several external data sets which were used in this study: Temperature and pressure profiles from the ERAInterim reanalysis data set were provided by the European Centre for Medium-Range Weather Forecasts. In situ measurements of trace gas and aerosol concentrations as well as meteorological data were performed by the environmental monitoring services of the States of Rhineland-Palatinate and Hesse (<http://www.luft-rlp.de> and <https://www.hlnug.de/themen/luft/luftmessnetz.html>). We thank M. O. Andreae and Günther Schebeske for operating the Ceilometer and the AERONET instrument at the Max Planck Institute for Chemistry.

**Tables**

Table 1 Overview on studies which did not apply a scaling factor (upper part) or did apply a scaling factor (lower part) to the measured O<sub>4</sub> dSCDs. Besides the initial studies proposing a scaling factor (Wagner et al., 2009; Clémer et al., 2010) only studies after 2010 are listed.

| Reference                                            | Measurement type        | Location and period                                                                                                                                                                                                                             | O <sub>4</sub> band (nm) | Scaling factor    |
|------------------------------------------------------|-------------------------|-------------------------------------------------------------------------------------------------------------------------------------------------------------------------------------------------------------------------------------------------|--------------------------|-------------------|
| <b>Studies which did not apply a scaling factor*</b> |                         |                                                                                                                                                                                                                                                 |                          |                   |
| <a href="#">Thalmann and Volkamer, 2010</a>          | <a href="#">CE-DOAS</a> | <a href="#">Laboratory</a>                                                                                                                                                                                                                      | <a href="#">477</a>      | <a href="#">1</a> |
| Peters et al., 2012a                                 | MAX-DOAS                | Western Pacific Ocean (Oct 2009)                                                                                                                                                                                                                | 360, 477                 | 1                 |
| Spinei et al. 2015                                   | Direct sun DOAS         | JPL, USA (Jul 2007)<br>Pullman, USA (Sep – Nov 2007, Jul – Nov 2011)<br>Fairbanks, USA (Mar-Apr 2011)<br>Huntsville, USA (Aug 2008)<br>Richland, USA (Apr-Jun 2008)<br>Greenbelt, USA (May 2007, 2012-2014)<br>Cabauw, The Netherlands (Jun-Jul | 360, 477                 | 1                 |

|                                                             |                      |                                                                                                                                                                                                 |                                                                         |                                        |
|-------------------------------------------------------------|----------------------|-------------------------------------------------------------------------------------------------------------------------------------------------------------------------------------------------|-------------------------------------------------------------------------|----------------------------------------|
|                                                             |                      | 2009)                                                                                                                                                                                           |                                                                         |                                        |
| Spinei et al., 2015 / <a href="#">Volkamer et al., 2015</a> | Airborne DOAS        | Subtropical Pacific Ocean (Jan 2012)                                                                                                                                                            | 360, 477                                                                | 1                                      |
| Ortega et al., 2016                                         | MAX-DOAS             | Cape Cod, USA (Jul 2012)                                                                                                                                                                        | 360, 477                                                                | 1                                      |
| Schreier et al., 2016                                       | MAX-DOAS             | Zugspitze, Germany (Apr-Jul 2003)<br>Pico Espeio, Venezuela (2004 - 2009)                                                                                                                       | 360                                                                     | 1                                      |
| Seyler et al., 2017                                         | MAX-DOAS             | German Bight (2013-2016)                                                                                                                                                                        | 360, 477                                                                | 1                                      |
| Wang et al., 2017a,b                                        | MAX-DOAS             | Wuxi, China (2011 - 2014)                                                                                                                                                                       | 360                                                                     | 1                                      |
| Gielen et al., 2017                                         | MAX-DOAS             | Bujumbura, Burundi (2013-2015)                                                                                                                                                                  | 360, 477                                                                | 1                                      |
| Franco et al., 2015                                         | MAX-DOAS             | Jungfrauoch (2010 –2012)                                                                                                                                                                        | 360                                                                     | 1                                      |
| <b>Studies which did apply a scaling factor</b>             |                      |                                                                                                                                                                                                 |                                                                         |                                        |
| Wagner et al., 2009                                         | MAX-DOAS             | Milano, Italy<br>Sep 2013 (FORMAT II)                                                                                                                                                           | 360                                                                     | 0.81                                   |
| Clemer et al., 2010                                         | MAX-DOAS             | Beijing, China<br>Jul 2008 – Apr 2009                                                                                                                                                           | 360, 477, 577, 630                                                      | 0.80                                   |
| Irie et al., 2011                                           | MAX-DOAS             | Cabauw, The Netherlands<br>Jul-Jun 2009 (CINDI-I)                                                                                                                                               | 360, 477                                                                | 0.75±0.1                               |
| Merlaud et al., 2011                                        | Airborne DOAS        | Arctic<br>Apr 2008 POLARCAT)                                                                                                                                                                    | 360                                                                     | 0.89                                   |
| Vlemmix et al., 2011                                        | MAX-DOAS             | Cabauw, The Netherlands<br>Jul-Oct 2009 (CINDI-I)                                                                                                                                               | 477                                                                     | 0.8                                    |
| Zieger et al., 2011                                         | Overview on MAX-DOAS | Cabauw, The Netherlands<br>Jul-Oct 2009 (CINDI-I)                                                                                                                                               | 360 (MPIC)<br>477 (BIRA)<br>477 (IUPHD)<br>477 (JAMSTEC)                | 0.83<br>0.75<br>0.8<br>0.8*            |
| Wang et al., 2014                                           | MAX-DOAS             | Xianghe, China (2010 - 2013)                                                                                                                                                                    | 360                                                                     | 0.8                                    |
| Kanaya et al., 2014                                         | MAX-DOAS             | Cape Hedo, Japan (2007 – 2012)<br>Fukue, Japan (2008 – 2012)<br>Yokosuda, Japan (2007 – 2012)<br>Gwangju, Korea (2008 – 2012)<br>Hefei, China (2008 – 2012)<br>Zvenigorod; Russia (2009 – 2012) | 477<br>477<br>477<br>477<br>477<br>477                                  | 0.8<br>0.8<br>0.8<br>0.8<br>0.8<br>0.8 |
| Hendrick et al., 2014                                       | MAX-DOAS             | Beijing, China (2008 - 2009)<br>Xianghe, China (2010 – 2012)                                                                                                                                    | 360                                                                     | 0.8                                    |
| Vlemmix et al., 2015                                        | MAX-DOAS             | Beijing, China (2008 - 2009)<br>Xianghe, China (2010 – 2012)                                                                                                                                    | 360, 477                                                                | 0.8                                    |
| Irie et al., 2015                                           | MAX-DOAS             | Tsukuba, Japan (Oct 2010)                                                                                                                                                                       | 477                                                                     | elevation dependent scaling factor**   |
| Wang et al., 2016                                           | MAX-DOAS             | Madrid, Spain (Mar – Sep 2015)                                                                                                                                                                  | 360                                                                     | 0.83                                   |
| Friess et al., 2016                                         | MAX-DOAS             | Cabauw, The Netherlands<br>Jul-Jul 2009 (CINDI-I)                                                                                                                                               | 477 (AOIFM)<br>477 (BIRA)<br>477 (IUPHD)<br>477 (JAMSTEC)<br>360 (MPIC) | 0.8<br>0.8<br>1<br>0.8***<br>0.77      |

\*The authors of part of these studies were probably not aware that a scaling factor was applied by other groups.

\*\*SF =  $1 / (1 + EA/60)$

\*\*\*SF is varied during profile inversion

1300  
1301  
1302  
1303

1304  
1305

Table 2 Periods on both selected days, which are used for the comparisons.

| day          | 1 <sup>st</sup> period | 2 <sup>nd</sup> period | 3 <sup>rd</sup> period |
|--------------|------------------------|------------------------|------------------------|
| 18 June 2013 | 8:00 – 11:00 UTC       | 11:00 – 14:00 UTC      | 14:00 – 19:00 UTC      |
| 8 July 2013  | 4:00 – 7:00 UTC        | 7:00 – 11:00 UTC       | 11:00 – 19:00 UTC      |

1306  
1307  
1308  
1309

Table 3 Participation of the different groups in the different analysis steps

| Abbreviation | Institution                                                                                                | Determination of the O <sub>4</sub> profile and VCD | Extraction of aerosol profiles | Radiative transfer simulations | Spectral analysis |
|--------------|------------------------------------------------------------------------------------------------------------|-----------------------------------------------------|--------------------------------|--------------------------------|-------------------|
| BIRA         | BIRA/IASB, Brussels, Belgium                                                                               |                                                     |                                |                                | •                 |
| CMA          | Meteorological Observation Center, Beijing, China                                                          |                                                     |                                | •                              | •                 |
| CSIC         | Department of Atmospheric Chemistry and Climate, Institute of Physical Chemistry Rocasolano (CSIC), Spain. | •                                                   |                                |                                | •                 |
| INTA         | Instituto Nacional de Tecnica Aeroespacial, Spain                                                          | •                                                   | •                              | •                              | •                 |
| IUP-B        | University of Bremen, Germany                                                                              |                                                     | •                              | •                              | •                 |
| IUP-HD       | University of Heidelberg, Germany                                                                          |                                                     |                                |                                | •                 |
| LMU          | Ludwig-Maximilians-Universität München, Germany                                                            | •                                                   | •                              |                                |                   |
| MPIC         | MPI for chemistry, Mainz, Germany                                                                          | •                                                   | •                              | •                              | •                 |

1310  
1311  
1312  
1313

Table 4 Overview on properties of MAX-DOAS instruments participating in this study

| Institute / Instrument type        | Spectral range (nm) | Spectral resolution (FWHM, nm) | Spectral range per detector pixel (nm) | Detector type / temperature                          | Integration time of individual spectra (s) | Reference            |
|------------------------------------|---------------------|--------------------------------|----------------------------------------|------------------------------------------------------|--------------------------------------------|----------------------|
| BIRA / 2-D scanning MAX-DOAS       | 300 - 386           | 0.49                           | 0.04                                   | 2-D back-illuminated CCD, 2048 x 512 pixels / -40 °C | 60                                         | Clémer et al., 2010  |
| IUP-Bremen / 2-D scanning MAX-DOAS | 308 - 376           | 0.43                           | 0.05                                   | 2-D back-illuminated CCD, 1340 x 400 pixels / -35 °C | 20                                         | Peters et al., 2012b |

|                                        |           |      |      |                                                                       |      |                     |
|----------------------------------------|-----------|------|------|-----------------------------------------------------------------------|------|---------------------|
| IUP-Heidelberg / 1-D scanning MAX-DOAS | 294 - 459 | 0.59 | 0.09 | AvaSpec-ULS 2048 pixels back-thinned Hamamatsu CCD S11071-1106 / 20°C | 60   | Lampel et al., 2015 |
| MPIC / 4-azimuth MAX-DOAS              | 320 – 457 | 0.67 | 0.14 | 2-D back-illuminated CCD, 1024 x 255 Pixels / -30°C                   | 10 s | Krautwurst, 2010    |

1314  
1315  
1316  
1317  
1318  
1319  
1320  
1321  
1322  
1323  
1324  
1325  
1326  
1327  
1328  
1329  
1330  
1331  
1332  
1333  
1334  
1335  
1336  
1337  
1338  
1339  
1340  
1341

Table 5 Independent data sets used to constrain the atmospheric properties during both selected days.

| Measurement / data set | Measured quantities                         | Derived quantities                                              | Temporal / spatial resolution         | Source / reference                                                                               |
|------------------------|---------------------------------------------|-----------------------------------------------------------------|---------------------------------------|--------------------------------------------------------------------------------------------------|
| Ceilmeter              | Attenuated backscatter profiles* at 1064 nm | Aerosol extinction profiles at 360 nm                           | 30s** / 15 m                          | Wiegner and Geiß, 2012                                                                           |
| AERONET sun photometer | Solar irradiances, Sky radiances            | Aerosol optical depth, single scattering albedo, phase function | Typical integration time: 2 to 15 min | Holben et al., 2001, <a href="https://aeronet.gsfc.nasa.gov/">https://aeronet.gsfc.nasa.gov/</a> |
| Surface                | temperature,                                |                                                                 | 1h                                    | <a href="http://www.luft-">http://www.luft-</a>                                                  |

|                                                                                 |                                            |  |                                                                          |                                                                                                                                                                                        |
|---------------------------------------------------------------------------------|--------------------------------------------|--|--------------------------------------------------------------------------|----------------------------------------------------------------------------------------------------------------------------------------------------------------------------------------|
| measurements<br>air quality<br>stations in<br>Mainz<br>Mombach                  | pressure,<br>rel. humidity                 |  |                                                                          | rlp.de                                                                                                                                                                                 |
| Surface<br>measurements<br>air quality<br>stations in<br>Mainz and<br>Wiesbaden | pm <sub>2.5</sub><br>pm <sub>10</sub>      |  | 1h (Mainz<br>stations)<br><br>30 min<br>(Wiesbaden<br>stations)***       | <a href="http://www.luft-rlp.de">http://www.luft-rlp.de</a><br><br><a href="https://www.hlnug.de/themen/luft/luftmessnetz.html">https://www.hlnug.de/themen/luft/luftmessnetz.html</a> |
| ECMWF<br>ERA-Interim<br>reanalysis                                              | temperature,<br>Pressure,<br>rel. humidity |  | Average over the<br>area 49.41°-50.53°<br>N, 7.88°-9.00° E,<br>every 6 h | (Dee et al., 2011)                                                                                                                                                                     |

1342 \*no useful signal below 180m due to limited overlap

1343 \*\*Here 15 min averages are used.

1344 \*\*\*Stations in Mainz: Parcusrstrasse, Zitadelle, Mombach; Stations in Wiesbaden: Schierstein,  
1345 Ringkirche, Süd

1346

1347

1348

1349

1350

Table 6 Standard settings for the radiative transfer simulations

| Parameter                        | Standard setting                                  |
|----------------------------------|---------------------------------------------------|
| Temperature and pressure profile | MPIC extraction                                   |
| O <sub>4</sub> profile           | MPIC extraction                                   |
| Surface albedo                   | 5 %                                               |
| Aerosol single scattering albedo | 0.95                                              |
| Aerosol phase function           | HG model with asymmetry parameter of 0.68         |
| Aerosol extinction profile       | MPIC extraction with linear interpolation < 180 m |
| Polarisation                     | Not considered                                    |
| Raman scattering                 | Partly considered for synthetic spectra           |

1351

1352

1353

1354

Table 7 Standard settings for the DOAS analysis of O<sub>4</sub>.

| Parameter                             | Value, Remark / Reference                                                                  |
|---------------------------------------|--------------------------------------------------------------------------------------------|
| Spectral range                        | 352 – 387 nm                                                                               |
| Degree of DOAS polynomial             | 5                                                                                          |
| Degree of intensity offset polynomial | 2                                                                                          |
| Fraunhofer reference spectrum         | 08 July, 10:05:35, SZA: 32.37°, elevation angle: 90° (this spectrum is used for both days) |
| Wavelength calibration                | Fit to high resolution solar spectrum using Gaussian slit function                         |
| Shift / squeeze                       | The measured spectrum is shifted and squeezed against all other spectra                    |
| Ring spectrum 1                       | Normal Ring spectrum calculated from DOASIS                                                |
| Ring spectrum 2                       | Ring spectrum 1 multiplied by $\lambda^{-4}$                                               |
| O <sub>3</sub> cross section          | 223 K, Bogumil et al. (2003)                                                               |

|                               |                                    |
|-------------------------------|------------------------------------|
| NO <sub>2</sub> cross section | 294 K, Vandaele et al. (1997)      |
| BrO cross section             | 223 K, Fleischmann et al. (2004)   |
| O <sub>4</sub> cross section  | 293 K, Thalman and Volkamer (2013) |

1355

1356

1357

1358

Table 8 Average ratios (simulation results divided by measurements) of the O<sub>4</sub> (d)AMFs for both middle periods of the selected days.

| Period     | 18.06.2013,<br>11:00 – 14:00 | 08.07.2013,<br>7:00 – 11:00 |
|------------|------------------------------|-----------------------------|
| AMF ratio  | 0.97                         | 0.83                        |
| DAMF ratio | 0.94                         | 0.69                        |

1359

1360

1361

1362

1363

1364

1365

1366

Table 9 Summary of uncertainties of the simulated O<sub>4</sub> (d)AMFs for the middle periods of both selected days. The two numbers left and right of the ‘/’ indicate the minimum and maximum deviations. The columns with label ‘Optimum’ indicate the uncertainties which could be reached if optimum information on the measurement conditions was available (e.g. height profiles of temperature, pressure and aerosol extinction as well as well aerosol microphysical or optical properties).

|                                           | <u>O<sub>4</sub> AMF</u> |                  |                         | <u>O<sub>4</sub> dAMF</u> |                    |                         |
|-------------------------------------------|--------------------------|------------------|-------------------------|---------------------------|--------------------|-------------------------|
|                                           | 18 June                  | 8 July           | <u>Optimum settings</u> | 18 June                   | 8 July             | <u>Optimum settings</u> |
| <b>Effects of RTM</b>                     |                          |                  |                         |                           |                    |                         |
| Radiative transfer model                  | -1% / +2%                | 0% / +1%         | <u>±1%</u>              | -1% / +5%                 | 0% / +3%           | <u>±1%</u>              |
| Polarisation                              | 0% / 0%                  | 0% / 0%          | <u>0%</u>               | 0% / 0%                   | 0% / +1%           | <u>0%</u>               |
| <b>Effects of input parameters</b>        |                          |                  |                         |                           |                    |                         |
| O <sub>4</sub> profile extraction         | 0% / + 2%                | 0% / + 1%        | <u>±1%</u>              | 0% / + 4%                 | 0% / + 2%          | <u>±1%</u>              |
| Single scattering albedo                  | -1% / + 3%               | -1% / + 1%       | <u>0%</u>               | -1% / + 3%                | -1% / + 1%         | <u>0%</u>               |
| Phase function                            | -3% / +3%                | -2% / 0%         | <u>±1%</u>              | -5% / + 9%                | -5% / +2%          | <u>±1.5%</u>            |
| Aerosol profile extraction                | -1% / + 1%*              | -2% / + 2%       | <u>±1%</u>              | -2% / + 1%*               | -4% / + 4%         | <u>±1.5%</u>            |
| Extrapolation below 180 m                 | 0% / + 2%                | -1% / + 1%       | <u>0%</u>               | -1% / + 4%                | -2% / + 2%         | <u>0%</u>               |
| <u>LIDAR ratio &amp; wrong wavelength</u> | <u>?</u>                 | <u>+5% / +6%</u> | <u>±2%**</u>            | <u>?</u>                  | <u>+13% / +17%</u> | <u>±3%**</u>            |
| Surface albedo                            | 0% / + 2%                | 0% / + 1%        | <u>0%</u>               | 0% / + 2%                 | -1% / + 0%         | <u>0%</u>               |
| <b>Total uncertainty</b>                  |                          |                  |                         |                           |                    |                         |
| Average deviation (from results for       | +4.5%                    | <u>+0.56%</u>    |                         | +8.5%                     | <u>+16%</u>        |                         |

|                      |              |             |              |             |              |              |
|----------------------|--------------|-------------|--------------|-------------|--------------|--------------|
| standard settings)   |              |             |              |             |              |              |
| Range of uncertainty | $\pm 4.4\%*$ | $\pm 2.8\%$ | $\pm 2.8%**$ | $\pm 8.7%*$ | $\pm 6.14\%$ | $\pm 3.8%**$ |

1367  
1368  
1369  
1370  
1371  
1372  
1373  
1374  
1375  
1376

\*this uncertainty does not contain the contribution from variation of aerosol properties with altitude, see text  
\*\*if LIDAR profiles at the same wavelength and without gaps in the troposphere were available.

Table 10 Summary of uncertainties of the measured O<sub>4</sub> (d)AMFs for the middle periods of both selected days. The two numbers left and right of the ‘/’ indicate the minimum and maximum deviations. The columns with label ‘Optimum’ indicate the uncertainties which could be reached if optimum instrumental performance was ensured and optimum cross section were available.

|                                                               | <u>O<sub>4</sub> AMF</u> |           |                | <u>O<sub>4</sub> dAMF</u> |           |                |
|---------------------------------------------------------------|--------------------------|-----------|----------------|---------------------------|-----------|----------------|
|                                                               | 18 June                  | 8 July    | <u>Optimum</u> | 18 June                   | 8 July    | <u>Optimum</u> |
| <b>Consistency spectral analysis versus RTM</b>               |                          |           |                |                           |           |                |
| Analysis of synthetic spectra                                 | -1% / +1%                | -1% / 0%  | $\pm 1\%$      | 0% / 0%                   | 0% / +1%  | $\pm 1\%$      |
| <b>Fit settings</b>                                           |                          |           |                |                           |           |                |
| Spectral range                                                | -7% / -3%                | -3% / 0%  | $\pm 1\%$      | -12% / -1%                | -6% / -1% | $\pm 1\%$      |
| Degree of polynomial                                          | +0% / +4%                | 0% / + 3% | $\pm 1\%$      | 0% / +6%                  | 0% / +6%  | $\pm 1\%$      |
| Intensity offset*                                             | +1% / +5%                | +1% / +3% | $\pm 1\%$      | +3% / +11%                | +2% / +4% | $\pm 1.5\%$    |
| Ring                                                          | +1% / +2%                | -1% / +1% | $\pm 1\%$      | +1% / +1%                 | -1% / +1% | $\pm 1.5\%$    |
| Temperature dependence of NO <sub>2</sub> absorption          | 0% / 0%                  | 0% / 0%   | <u>0%</u>      | 0% / 0%                   | 0% / 0%   | <u>0% / 0%</u> |
| Wavelength dependence of NO <sub>2</sub> absorption           | -1% / 0%                 | 0% / 0%   | <u>0%</u>      | -2% / -1%                 | -1% / 0%  | <u>0%</u>      |
| Wavelength dependence of O <sub>4</sub> absorption            | -1% / 0%                 | -1% / -1% | <u>0%</u>      | 0% / +1%                  | -1% / -1% | <u>0%</u>      |
| Including H <sub>2</sub> O cross section                      | 0% / 0%                  | 0% / 0%   | <u>0%</u>      | +1% / +1%                 | +1% / +1% | <u>0%</u>      |
| Including HCHO cross section                                  | -3% / 0%                 | -1% / 0%  | <u>0%</u>      | -6% / -4%                 | -3% / -2% | <u>0%</u>      |
| Different O <sub>4</sub> cross sections*                      | -2% / +1%                | -2% / +1% | $\pm 2\%$      | -3% / +3%                 | -3% / +3% | $\pm 2\%$      |
| <b>Temperature dependence of the O<sub>4</sub> absorption</b> |                          |           |                |                           |           |                |
| Analysis using two O <sub>4</sub> cross                       | 0% / 0%                  | +2% / +2% | $\pm 1\%$      | +4% / +4%                 | +1% / +1% | $\pm 1.5\%$    |



|                                                                  |            |            |                         |  |            |            |              |
|------------------------------------------------------------------|------------|------------|-------------------------|--|------------|------------|--------------|
| sections for different temperatures <sup>♥</sup>                 |            |            |                         |  |            |            |              |
| Analysis of synthetic spectra for different surface temperatures | -1% / 0%   | -1% / +2%  |                         |  | +4% / +4%  | +1% / +1%  |              |
| <b>Analysis from different instruments and groups</b>            |            |            |                         |  |            |            |              |
| Different groups and analyses <sup>♦</sup>                       | -6% / + 5% | -6% / + 5% | <u>±3%</u> <sup>▲</sup> |  | -12% / +7% | -12% / +7% | <u>±4.5%</u> |
| <b>Total uncertainty</b>                                         |            |            |                         |  |            |            |              |
| Average deviation (from results for standard settings)           | -4.5%      | -0.5%      |                         |  | +1%        | -1.5%      |              |
| Range of uncertainty                                             | ±7.0%      | ±6.5%      | <u>±4.2%</u>            |  | ±12.5%     | ±10.8%     | <u>±5.7%</u> |

1377 \*here the case ‘no offset’ is not considered

1378 \*here the case of the non-shifted Greenblatt O<sub>4</sub> cross section is not considered

1379 ♥here only the results for the measured spectra in the spectral range 352 – 387 nm are  
1380 considered. (temperatures on 18 June: 27–31 °C; 8 July: 20–30 °C)

1381 ♦The results for 18 June are also taken for 8 July due to the lack of measurements on 8 July

1382 ▲see Kreher et al., 2019

1383

1384

### 1385 References

1386

1387 Acarreta, J. R., De Haan, J. F., and Stammes, P.: Cloud pressure retrieval using the O<sub>2</sub>-O<sub>2</sub>  
1388 absorption band at 477 nm, J. Geophys. Res., 109, D05204, doi:10.1029/2003JD003915,  
1389 2004.

1390

1391 Bogumil, K., J. Orphal, T. Homann, S. Voigt, P. Spietz, O.C. Fleischmann, A. Vogel, M.  
1392 Hartmann, H. Bovensmann, J. Frerik and J.P. Burrows, Measurements of Molecular  
1393 Absorption Spectra with the SCIAMACHY Pre-Flight Model: Instrument Characterization  
1394 and Reference Data for Atmospheric Remote-Sensing in the 230-2380 nm Region, J.  
1395 Photochem. Photobiol. A., 157, 167-184, 2003.

1396

1397 Chance, K.V., and R.L. Kurucz, An improved high-resolution solar reference spectrum for  
1398 earth’s atmosphere measurements in the ultraviolet, visible, and near infrared, J. Quant.  
1399 Spectrosc. Radiat. Transfer, 111, 1289-1295, 2010.

1400

1401 Chandrasekhar S. Radiative Transfer. New York: Dover Publications Inc.; 1960.

1402

1403 Chandrasekhar S. Selected papers, vol. 2. New York: University of Chicago Press, 1989.

1404  
1405 Clémer, K., Van Roozendael, M., Fayt, C., Hendrick, F., Hermans, C., Pinardi, G., Spurr, R.,  
1406 Wang, P., and De Mazière, M.: Multiple wavelength retrieval of tropospheric aerosol optical  
1407 properties from MAXDOAS measurements in Beijing, *Atmos. Meas. Tech.*, 3, 863-878,  
1408 doi:10.5194/amt-3-863-2010, 2010.  
1409  
1410 Dee, D. P., Uppala, S. M., Simmons, A. J., Berrisford, P., Poli, P., Kobayashi, S., Andrae, U.,  
1411 Balmaseda, M. A., Balsamo, G., Bauer, P., Bechtold, P., Beljaars, A. C. M., van de Berg, L.,  
1412 Bidlot, J., Bormann, N., Delsol, C., Dragani, R., Fuentes, M., Geer, A. J., Haimberger, L.,  
1413 Healy, S. B., Hersbach, H., Hólm, E. V., Isaksen, I., Kallberg, P., Köhler, M., Matricardi,  
1414 M., McNally, A. P., Monge-Sanz, B. M., Morcrette, J.-J., Park, B.-K., Peubey, C., de Rosnay,  
1415 P., Tavolato, C., Thépaut, J.-N., and Vitart, F.: The ERA-Interim reanalysis: configuration  
1416 and performance of the data assimilation system, *Q. J. Roy. Meteorol. Soc.*, 137, 553–597,  
1417 doi:10.1002/qj.828, 2011.  
1418  
1419 Deutschmann, T., Beirle, S., Frieß, U., Grzegorski, M., Kern, C., Kritzen, L., Platt, U., Pukite,  
1420 J., Wagner, T., Werner, B., and Pfeilsticker, K.: The Monte Carlo Atmospheric Radiative  
1421 Transfer Model McArtim: Introduction and Validation of Jacobians and 3D Features, *J.*  
1422 *Quant. Spectrosc. Ra.*, 112, 1119–1137, doi:10.1016/j.jqsrt.2010.12.009, 2011.  
1423  
1424 Dubovik, O., Holben, B. N., Eck, T. F., Smirnov, A., Kaufman, Y. J., King, M. D., Tanré, D.,  
1425 and Slutsker, I.: Variability of absorption and optical properties of key aerosol types observed  
1426 in worldwide locations, *J. Atmos. Sci.*, 59, 590–608, 2002.  
1427  
1428 Erle, F., K. Pfeilsticker, and U. Platt, On the influence of tropospheric clouds on zenith-  
1429 scattered-light measurements of stratospheric species, *Geophys. Res. Lett.*, 22, 2725- 2728,  
1430 1995.  
1431  
1432 Fleischmann, O. C., Hartmann, M., Burrows, J. P., and Orphal, J.: New ultraviolet absorption  
1433 cross-sections of BrO at atmospheric temperatures measured by time-windowing Fourier  
1434 transform spectroscopy, *J. Photoch. Photobio. A*, 168, 117–132, 2004.  
1435  
1436 Franco, B., Hendrick, F., Van Roozendael, M., Müller, J.-F., Stavrou, T., Marais, E. A.,  
1437 Bovy, B., Bader, W., Fayt, C., Hermans, C., Lejeune, B., Pinardi, G., Servais, C., and Mahieu,  
1438 E.: Retrievals of formaldehyde from ground-based FTIR and MAX-DOAS observations at the  
1439 Jungfraujoch station and comparisons with GEOS Chem and IMAGES model simulations,  
1440 *Atmos. Meas. Tech.*, 8, 1733-1756, <https://doi.org/10.5194/amt-8-1733-2015>, 2015.  
1441  
1442 Frieß, F., P. S. Monks, J. J. Remedios, A. Rozanov, R. Sinreich, T. Wagner, and U. Platt,  
1443 MAX-DOAS O<sub>4</sub> measurements: A new technique to derive information on atmospheric  
1444 aerosols. (II) Modelling studies, *J. Geophys. Res.*, 111, D14203,  
1445 doi:10.1029/2005JD006618.2006.  
1446  
1447 Frieß, U., Klein Baltink, H., Beirle, S., Clémer, K., Hendrick, F., Henzing, B., Irie, H., de  
1448 Leeuw, G., Li, A., Moerman, M. M., van Roozendael, M., Shaiganfar, R., Wagner, T., Wang,  
1449 Y., Xie, P., Yilmaz, S., and Zieger, P.: Intercomparison of aerosol extinction profiles retrieved  
1450 from MAX-DOAS measurements, *Atmos. Meas. Tech.*, 9, 3205-3222,  
1451 <https://doi.org/10.5194/amt-9-3205-2016>, 2016.  
1452  
1453 Gielen, C., Hendrick, F., Pinardi, G., De Smedt, I., Fayt, C., Hermans, C., Stavrou, T.,  
1454 Bauwens, M., Müller, J.-F., Ndenzako, E., Nzohabonayo, P., Akimana, R., Niyonzima, S.,

1455 Van Roozendael, M., and De Mazière, M.: Characterisation of Central-African aerosol and  
1456 trace-gas emissions based on MAX-DOAS measurements and model simulations over  
1457 Bujumbura, Burundi, *Atmos. Chem. Phys. Discuss.*, <https://doi.org/10.5194/acp-2016-1104>,  
1458 in review, 2017.

1459

1460 Greenblatt G.D., Orlando, J.J., Burkholder, J.B., and Ravishankara, A.R.: Absorption  
1461 measurements of oxygen between 330 and 1140 nm, *J. Geophys. Res.*, 95, 18577-18582,  
1462 1990.

1463

1464 Hendrick, F., Van Roozendael, M., Kylling, A., Petritoli, A., Rozanov, A., Sanghavi, S.,  
1465 Schofield, R., von Friedeburg, C., Wagner, T., Wittrock, F., Fonteyn, D., and De Mazière, M.:  
1466 Intercomparison exercise between different radiative transfer models used for the  
1467 interpretation of ground-based zenith-sky and multi-axis DOAS observations, *Atmos. Chem.*  
1468 *Phys.*, 6, 93-108, doi:10.5194/acp-6-93-2006, 2006.

1469

1470 Hendrick, F., Müller, J.-F., Clémer, K., Wang, P., De Mazière, M., Fayt, C., Gielen, C.,  
1471 Hermans, C., Ma, J. Z., Pinardi, G., Stavrakou, T., Vlemmix, T., and Van Roozendael, M.:  
1472 Four years of ground-based MAX-DOAS observations of HONO and NO<sub>2</sub> in the Beijing area,  
1473 *Atmos. Chem. Phys.*, 14, 765-781, <https://doi.org/10.5194/acp-14-765-2014>, 2014.

1474

1475 Heue, K.-P., Riede, H., Walter, D., Brenninkmeijer, C. A. M., Wagner, T., Frieß, U., Platt, U.,  
1476 Zahn, A., Stratmann, G., and Ziereis, H.: CARIBIC DOAS observations of nitrous acid and  
1477 formaldehyde in a large convective cloud, *Atmos. Chem. Phys.*, 14, 6621-6642,  
1478 <https://doi.org/10.5194/acp-14-6621-2014>, 2014.

1479

1480 Hönninger, G., von Friedeburg, C., and Platt, U.: Multi Axis Differential Optical Absorption  
1481 Spectroscopy (MAX-DOAS), *Atmos. Chem. Phys.*, 4, 231–254, 2004.

1482

1483 Holben, B. N., Tanre, D., Smirnov, A., Eck, T. F., Slutsker, I., Abuhassan, N., Newcomb, W.  
1484 W., Schafer, J., Chatenet, B., Lavenue, F., Kaufman, Y. J., Vande Castle, J., Setzer, A.,  
1485 Markham, B., Clark, D., Frouin, R., Halthore, R., Karnieli, A., O'Neill, N. T., Pietras, C.,  
1486 Pinker, R. T., Voss, K., and Zibordi, G.: An emerging ground-based aerosol climatology:  
1487 Aerosol Optical Depth from AERONET, *J. Geophys. Res.*, 106, 12067–12097, 2001.

1488

1489 Irie, H., Kanaya, Y., Akimoto, H., Iwabuchi, H., Shimizu, A., and Aoki, K.: First retrieval of  
1490 tropospheric aerosol profiles using MAX-DOAS and comparison with lidar and sky  
1491 radiometer measurements, *Atmos. Chem. Phys.*, 8, 341–350, doi:10.5194/acp-8-341-2008,  
1492 2008.

1493

1494 Irie, H., Takashima, H., Kanaya, Y., Boersma, K. F., Gast, L., Wittrock, F., Brunner, D.,  
1495 Zhou, Y., and Van Roozendael, M.: Eight-component retrievals from ground-based MAX-  
1496 DOAS observations, *Atmos. Meas. Tech.*, 4, 1027-1044, [https://doi.org/10.5194/amt-4-1027-](https://doi.org/10.5194/amt-4-1027-2011)  
1497 2011, 2011.

1498

1499 Irie, H., Nakayama, T., Shimizu, A., Yamazaki, A., Nagai, T., Uchiyama, A., Zaizen, Y.,  
1500 Kagamitani, S., and Matsumi, Y.: Evaluation of MAX-DOAS aerosol retrievals by coincident  
1501 observations using CRDS, lidar, and sky radiometer inTsukuba, Japan, *Atmos. Meas. Tech.*,  
1502 8, 2775-2788, <https://doi.org/10.5194/amt-8-2775-2015>, 2015.

1503

1504 Kanaya, Y., Irie, H., Takashima, H., Iwabuchi, H., Akimoto, H., Sudo, K., Gu, M., Chong, J.,  
1505 Kim, Y. J., Lee, H., Li, A., Si, F., Xu, J., Xie, P.-H., Liu, W.-Q., Dzhola, A., Postlyakov, O.,

1506 Ivanov, V., Grechko, E., Terpugova, S., and Panchenko, M.: Long-term MAX-DOAS  
1507 network observations of NO<sub>2</sub> in Russia and Asia (MADRAS) during the period 2007–2012:  
1508 instrumentation, elucidation of climatology, and comparisons with OMI satellite observations  
1509 and global model simulations, *Atmos. Chem. Phys.*, 14, 7909–7927,  
1510 <https://doi.org/10.5194/acp-14-7909-2014>, 2014.

1511  
1512 [Kreher, K., M. Van Roozendael, F. Hendrick, A. Apituley, E. Dimitropoulou, U. Friess, A.](#)  
1513 [Richter, T. Wagner, L. Ang, M. Anguas, A. Bais, N. Benavent, K. Bognar, A. Borovski, I.](#)  
1514 [Bruchkovsky, A. Cede, K.L. Chan, S. Donner, T. Drosoglou, C. Fayt, H. Finkenzeller, N.](#)  
1515 [Hao, C. Hermans, S. Hoque, H. Irie, J. Jin, P. Johnston, J. Khayyam Butt, F. Khokhar, T.](#)  
1516 [Koenig, J. Ma, A. K. Mishra, M. Navarro-Comas, A. Pazmino, E. Peters, M. Pinharanda, A.](#)  
1517 [Piters, O. Postlyakov, C. Prados, O. Rodriguez, R. Querel, A. Saiz-Lopez, S. Schreier, A.](#)  
1518 [Seyler, E. Spinei, K. Strong, M. Tiefengraber, J.-L. Tirpitz, V. Kumar, R. Volkamer, M.](#)  
1519 [Wenig, P. Xie, J. Xu, M. Yela, X. Zhao, W. Zhuoru, Intercomparison of NO<sub>2</sub>, O<sub>4</sub>, O<sub>3</sub> and](#)  
1520 [HCHO slant column measurements by MAX-DOAS and zenith-sky UV-Visible](#)  
1521 [spectrometers, to be submitted to Atmos. Meas. Tech., 2019.](#)

1522  
1523 Krautwurst, S.: Charakterisierung eines neu aufgebauten MAXDOAS-Systems und  
1524 Interpretation von ersten Messergebnissen zu dem Spurenstoff NO<sub>2</sub>, Diplomarbeit,  
1525 Fachhochschule Coburg, Coburg, Germany, 2010.

1526  
1527 Lampel, J., Frieß, U., and Platt, U.: The impact of vibrational Raman scattering of air on  
1528 DOAS measurements of atmospheric trace gases, *Atmos. Meas. Tech.*, 8, 3767–3787,  
1529 <https://doi.org/10.5194/amt-8-3767-2015>, 2015.

1530  
1531 Lampel, J., Pöhler, D., Polyansky, O. L., Kyuberis, A. A., Zobov, N. F., Tennyson, J., Lodi,  
1532 L., Frieß, U., Wang, Y., Beirle, S., Platt, U., and Wagner, T.: Detection of water vapour  
1533 absorption around 363 nm in measured atmospheric absorption spectra and its effect on  
1534 DOAS evaluations, *Atmos. Chem. Phys.*, 17, 1271–1295, [https://doi.org/10.5194/acp-17-](https://doi.org/10.5194/acp-17-1271-2017)  
1535 [1271-2017](https://doi.org/10.5194/acp-17-1271-2017), 2017.

1536  
1537 Lorente, A., Folkert Boersma, K., Yu, H., Dörner, S., Hilboll, A., Richter, A., Liu, M.,  
1538 Lamsal, L. N., Barkley, M., De Smedt, I., Van Roozendael, M., Wang, Y., Wagner, T., Beirle,  
1539 S., Lin, J.-T., Krotkov, N., Stammes, P., Wang, P., Eskes, H. J., and Krol, M.: Structural  
1540 uncertainty in air mass factor calculation for NO<sub>2</sub> and HCHO satellite retrievals, *Atmos.*  
1541 *Meas. Tech.*, 10, 759–782, <https://doi.org/10.5194/amt-10-759-2017>, 2017.

1542  
1543 Meller, R. and G. K. Moortgat, Temperature dependence of the absorption cross sections of  
1544 formaldehyde between 223 and 323 K in the wavelength range 225–375 nm, *J. Geophys. Res.*,  
1545 105, 7089–7101, 2000.

1546  
1547 Merlaud, A., Van Roozendael, M., Theys, N., Fayt, C., Hermans, C., Quennehen, B.,  
1548 Schwarzenboeck, A., Ancellet, G., Pommier, M., Pelon, J., Burkhardt, J., Stohl, A., and De  
1549 Mazière, M.: Airborne DOAS measurements in Arctic: vertical distributions of aerosol  
1550 extinction coefficient and NO<sub>2</sub> concentration, *Atmos. Chem. Phys.*, 11, 9219–9236,  
1551 [doi:10.5194/acp-11-9219-2011](https://doi.org/10.5194/acp-11-9219-2011), 2011.

1552  
1553 Ortega, I., Berg, L. K., Ferrare, R. A., Hair, J. W., Hostetler, C. A., and Volkamer, R.:  
1554 Elevated aerosol layers modify the O<sub>2</sub>-O<sub>2</sub> absorption measured by ground-based MAX-  
1555 DOAS, *J. Quant. Spectrosc. Ra.*, 176, 34–49, [doi:10.1016/j.jqsrt.2016.02.021](https://doi.org/10.1016/j.jqsrt.2016.02.021), 2016.

1556

1557 Paur, R. J. and Bass, A. M.: The Ultraviolet Cross-Sections of Ozone: II. Results and  
1558 temperature dependence, in: Atmospheric ozone; Proc. Quadrennial Ozone Symposium,  
1559 edited by: Zeferos, C. S. and Ghazi, A., Halkidiki Greece, 1984, Dordrecht: Reidel, D., 611–  
1560 615, 1984.  
1561  
1562 Peters, E., Wittrock, F., Großmann, K., Frieß, U., Richter, A., and Burrows, J. P.:  
1563 Formaldehyde and nitrogen dioxide over the remote western Pacific Ocean: SCIAMACHY  
1564 and GOME-2 validation using ship-based MAX-DOAS observations, *Atmos. Chem. Phys.*,  
1565 12, 11179–11197, <https://doi.org/10.5194/acp-12-11179-2012>, 2012a.  
1566  
1567 Peters, E., Wittrock, F., Großmann, K., Frieß, U., Richter, A., and Burrows, J. P.:  
1568 Formaldehyde and nitrogen dioxide over the remote western Pacific Ocean: SCIAMACHY  
1569 and GOME-2 validation using ship-based MAX-DOAS observations, *Atmos.*  
1570 *Chem. Phys.*, 12, 11179–11197, <https://doi.org/10.5194/acp-12-11179-2012>, 2012b.  
1571  
1572 Pinardi, G., Van Roozendaal, M., Abuhassan, N., Adams, C., Cede, A., Clémer, K., Fayt, C.,  
1573 Frieß, U., Gil, M., Herman, J., Hermans, C., Hendrick, F., Irie, H., Merlaud, A., Navarro  
1574 Comas, M., Peters, E., Pipers, A. J. M., Puentedura, O., Richter, A., Schönhardt, A.,  
1575 Shaiganfar, R., Spinei, E., Strong, K., Takashima, H., Vrekoussis, M., Wagner, T., Wittrock,  
1576 F., and Yilmaz, S.: MAX-DOAS formaldehyde slant column measurements during CINDI:  
1577 intercomparison and analysis improvement, *Atmos. Meas. Tech.*, 6, 167–185,  
1578 <https://doi.org/10.5194/amt-6-167-2013>, 2013.  
1579  
1580 Polyansky, O.L., A.A. Kyuberis, N.F. Zobov, J. Tennyson, S.N. Yurchenko and L. Lodi  
1581 ExoMol molecular line lists XXX: a complete high-accuracy line list for water, *Mon. Not. R.*  
1582 *astr. Soc.*, submitted, 2018.  
1583  
1584 Prados-Roman, C., Butz, A., Deutschmann, T., Dorf, M., Kritzen, L., Minikin, A., Platt, U.,  
1585 Schlager, H., Sihler, H., Theys, N., Van Roozendaal, M., Wagner, T., and Pfeilsticker, K.:  
1586 Airborne DOAS limb measurements of tropospheric trace gas profiles: case studies on the  
1587 profile retrieval of O<sub>4</sub> and BrO, *Atmos. Meas. Tech.*, 4, 1241–1260, [doi:10.5194/amt-4-1241-](https://doi.org/10.5194/amt-4-1241-2011)  
1588 2011, 2011.  
1589  
1590 Puķīte, J., Kühl, S., Deutschmann, T., Platt, U., and Wagner, T.: Extending differential optical  
1591 absorption spectroscopy for limb measurements in the UV, *Atmos. Meas. Tech.*, 3, 631–653,  
1592 [doi:10.5194/amt-3-631-2010](https://doi.org/10.5194/amt-3-631-2010), 2010.  
1593  
1594 Schreier, S. F., Richter, A., Wittrock, F., and Burrows, J. P.: Estimates of free-tropospheric  
1595 NO<sub>2</sub> and HCHO mixing ratios derived from high-altitude mountain MAX-DOAS  
1596 observations at midlatitudes and in the tropics, *Atmos. Chem. Phys.*, 16, 2803–2817,  
1597 <https://doi.org/10.5194/acp-16-2803-2016>, 2016.  
1598  
1599 Serdyuchenko, A., Gorshchev, V., Weber, M., Chehade, W., and Burrows, J. P.: High spectral  
1600 resolution ozone absorption cross-sections – Part 2: Temperature dependence, *Atmos. Meas.*  
1601 *Tech.*, 7, 625–636, <https://doi.org/10.5194/amt-7-625-2014>, 2014.  
1602  
1603 Seyler, A., Wittrock, F., Kattner, L., Mathieu-Üffing, B., Peters, E., Richter, A., Schmolke, S.,  
1604 and Burrows, J. P.: Monitoring shipping emissions in the German Bight using MAX-DOAS  
1605 measurements, *Atmos. Chem. Phys.*, 17, 10997–11023, [https://doi.org/10.5194/acp-17-10997-](https://doi.org/10.5194/acp-17-10997-2017)  
1606 2017, 2017.  
1607

1608 Sneep, M., de Haan, J. F., Stammes, P., Wang, P., Vanbauce, C., Joiner, J., Vasilkov, A. P.,  
1609 and Levelt, P. F.: Three-way comparison between OMI and PARASOL cloud pressure  
1610 products, *J. Geophys. Res.*, 113, D15S23, doi:10.1029/2007JD008694, 2008.  
1611

1612 Solomon, S., A. L. Schmeltekopf, and R. W. Sanders, On the interpretation of zenith sky  
1613 absorption measurements, *J. Geophys. Res.*, 92, 8311-8319, 1987.  
1614

1615 Spinei, E., Cede, A., Herman, J., Mount, G. H., Eloranta, E., Morley, B., Baidar, S., Dix, B.,  
1616 Ortega, I., Koenig, T., and Volkamer, R.: Ground-based direct-sun DOAS and airborne  
1617 MAX-DOAS measurements of the collision-induced oxygen complex, O<sub>2</sub>O<sub>2</sub>, absorption with  
1618 significant pressure and temperature differences, *Atmos. Meas. Tech.*, 8, 793-809,  
1619 <https://doi.org/10.5194/amt-8-793-2015>, 2015.  
1620

1621 Spurr RJD, Kurosu TP, Chance KV. A linearized discrete ordinate radiative transfer model  
1622 for atmospheric remote sensing retrieval. *JQSRT* 2001;68:689–735.  
1623

1624 Spurr, R., LIDORT and VLIDORT: Linearized Pseudo-Spherical Scalar and Vector Discrete  
1625 Ordinate Radiative Transfer Models for Use in Remote Sensing Retrieval Problems, *Light*  
1626 *Scattering Reviews*, Vol. 3, edited by: Kokhanovsky, A., Springer, Berlin Heidelberg,  
1627 Germany, 2008.  
1628

1629 Stamnes K, Tsay S-C, Wiscombe W, Jayaweera K. Numerically stable algorithm for discrete  
1630 ordinate method radiative transfer in multiple scattering and emitting layered media. *Appl Opt*  
1631 1988; 27:2502-9.  
1632

1633 [Thalman, R. and Volkamer, R.: Inherent calibration of a blue LED-CE-DOAS instrument to](#)  
1634 [measure iodine oxide, glyoxal, methyl glyoxal, nitrogen dioxide, water vapour and aerosol](#)  
1635 [extinction in open cavity mode, \*Atmos. Meas. Tech.\*, 3, 1797-1814, 2010.](#)  
1636

1637 Thalman, R. and Volkamer, R.: Temperature dependent absorption cross-sections of O<sub>2</sub>-O<sub>2</sub>  
1638 collision pairs between 340 and 630 nm and at atmospherically relevant pressure, *Phys.*  
1639 *Chem. Chem. Phys.*, 15, 15371, doi:10.1039/c3cp50968k, 2013.  
1640

1641 United States Committee on Extension to the Standard Atmosphere: U.S. Standard  
1642 Atmosphere, 1976, National Oceanic and Atmospheric Administration, National Aeronautics  
1643 and Space Administration, United States Air Force, Washington D.C., 1976.  
1644

1645 Vandaele, A. C., C. Hermans, P. C. Simon, M. Carleer, R. Colin, S. Fally, M.-F. Méridienne, A.  
1646 Jenouvrier, and B. Coquart, Measurements of the NO<sub>2</sub> Absorption Cross-section from 42000  
1647 cm<sup>-1</sup> to 10000 cm<sup>-1</sup> (238-1000 nm) at 220 K and 294 K, *J. Quant. Spectrosc. Radiat.*  
1648 *Transfer*, 59, 171-184, 1997.  
1649

1650 Vlemmix, T., Piters, A. J. M., Berkhout, A. J. C., Gast, L. F. L., Wang, P., and Levelt, P. F.:  
1651 Ability of the MAX-DOAS method to derive profile information for NO<sub>2</sub>: can the boundary  
1652 layer and free troposphere be separated?, *Atmos. Meas. Tech.*, 4, 2659-2684,  
1653 <https://doi.org/10.5194/amt-4-2659-2011>, 2011.  
1654

1655 Vlemmix, T., Hendrick, F., Pinardi, G., De Smedt, I., Fayt, C., Hermans, C., Piters, A., Wang,  
1656 P., Levelt, P., and Van Roozendaal, M.: MAX-DOAS observations of aerosols, formaldehyde  
1657 and nitrogen dioxide in the Beijing area: comparison of two profile retrieval approaches,  
1658 *Atmos. Meas. Tech.*, 8, 941-963, <https://doi.org/10.5194/amt-8-941-2015>, 2015.

1659  
1660 [Volkamer, R., Baidar, S., Campos, T. L., Coburn, S., DiGangi, J. P., Dix, B., Eloranta, E. W.,](#)  
1661 [Koenig, T. K., Morley, B., Ortega, I., Pierce, B. R., Reeves, M., Sinreich, R., Wang, S.,](#)  
1662 [Zondlo, M. A., and Romashkin, P. A.: Aircraft measurements of BrO, IO, glyoxal, NO<sub>2</sub>, H<sub>2</sub>O,](#)  
1663 [O<sub>2</sub>-O<sub>2</sub> and aerosol extinction profiles in the tropics: comparison with aircraft-/ship-based in](#)  
1664 [situ and lidar measurements, \*Atmos. Meas. Tech.\*, 8, 2121-2148, 2015.](#)  
1665  
1666 Wagner, T., F. Erle, L. Marquard, C. Otten, K. Pfeilsticker, T. Senne, J. Stutz, and U. Platt,  
1667 Cloudy sky optical paths as derived from differential optical absorption spectroscopy  
1668 observations, *J. Geophys. Res.*, 103, 25307-25321, 1998.  
1669  
1670 Wagner, T., B. Dix, C.v. Friedeburg, U. Frieß, S. Sanghavi, R. Sinreich, and U. Platt MAX-  
1671 DOAS O<sub>4</sub> measurements – a new technique to derive information on atmospheric aerosols.  
1672 (I) Principles and information content, *J. Geophys. Res.*, 109, doi: 10.1029/2004JD004904,  
1673 2004.  
1674  
1675 Wagner, T., J. P. Burrows, T. Deutschmann, B. Dix, C. von Friedeburg, U. Frieß, F.  
1676 Hendrick, K.-P. Heue, H. Irie, H. Iwabuchi, Y. Kanaya, J. Keller, C. A. McLinden, H. Oetjen,  
1677 E. Palazzi, A. Petritoli, U. Platt, O. Postlyakov, J. Pukite, A. Richter, M. van Roozendaal, A.  
1678 Rozanov, V. Rozanov, R. Sinreich, S. Sanghavi, F. Wittrock, Comparison of Box-Air-Mass-  
1679 Factors and Radiances for Multiple-Axis Differential Optical Absorption Spectroscopy  
1680 (MAX-DOAS) Geometries calculated from different UV/visible Radiative Transfer Models,  
1681 *Atmos. Chem. Phys.*, 7, 1809-1833, 2007.  
1682  
1683 Wagner, T., Deutschmann, T., and Platt, U.: Determination of aerosol properties from MAX-  
1684 DOAS observations of the Ring effect, *Atmos. Meas. Tech.*, 2, 495-512, 2009.  
1685  
1686 Wagner, T., Beirle, S., Deutschmann, T., and Penning de Vries, M.: A sensitivity analysis of  
1687 Ring effect to aerosol properties and comparison to satellite observations, *Atmos. Meas.*  
1688 *Tech.*, 3, 1723-1751, doi:10.5194/amt-3-1723-2010, 2010.  
1689  
1690 Wang, T., Hendrick, F., Wang, P., Tang, G., Clémer, K., Yu, H., Fayt, C., Hermans, C.,  
1691 Gielen, C., Müller, J.-F., Pinardi, G., Theys, N., Brenot, H., and Van Roozendaal, M.:  
1692 Evaluation of tropospheric SO<sub>2</sub> retrieved from MAX-DOAS measurements in Xianghe,  
1693 China, *Atmos. Chem. Phys.*, 14, 11149-11164, <https://doi.org/10.5194/acp-14-11149-2014>,  
1694 2014.  
1695  
1696 Wang, S., Cuevas, C. A., Frieß, U., and Saiz-Lopez, A.: MAX-DOAS retrieval of aerosol  
1697 extinction properties in Madrid, Spain, *Atmos. Meas. Tech.*, 9, 5089-5101,  
1698 <https://doi.org/10.5194/amt-9-5089-2016>, 2016.  
1699  
1700 Wang, Y., Beirle, S., Lampel, J., Koukouli, M., De Smedt, I., Theys, N., Li, A., Wu, D., Xie,  
1701 P., Liu, C., Van Roozendaal, M., Stavrou, T., Müller, J.-F., and Wagner, T.: Validation of  
1702 OMI, GOME-2A and GOME-2B tropospheric NO<sub>2</sub>, SO<sub>2</sub> and HCHO products using MAX-  
1703 DOAS observations from 2011 to 2014 in Wuxi, China: investigation of the effects of priori  
1704 profiles and aerosols on the satellite products, *Atmos. Chem. Phys.*, 17, 5007-5033,  
1705 <https://doi.org/10.5194/acp-17-5007-2017>, 2017a.  
1706  
1707 Wang, Y., Lampel, J., Xie, P., Beirle, S., Li, A., Wu, D., and Wagner, T.: Ground-based  
1708 MAX-DOAS observations of tropospheric aerosols, NO<sub>2</sub>, SO<sub>2</sub> and HCHO in Wuxi, China,

1709 from 2011 to 2014, *Atmos. Chem. Phys.*, 17, 2189–2215, doi:10.5194/acp-17-2189-2017,  
1710 2017b.  
1711  
1712 Wang, Y., Beirle, S., Hendrick, F., Hilboll, A., Jin, J., Kyuberis, A. A., Lampel, J., Li, A.,  
1713 Luo, Y., Lodi, L., Ma, J., Navarro, M., Ortega, I., Peters, E., Polyansky, O. L., Remmers, J.,  
1714 Richter, A., Puentedura, O., Van Roozendael, M., Seyler, A., Tennyson, J., Volkamer, R.,  
1715 Xie, P., Zobov, N. F., and Wagner, T.: MAX-DOAS measurements of HONO slant column  
1716 densities during the MAD-CAT campaign: inter-comparison, sensitivity studies on spectral  
1717 analysis settings, and error budget, *Atmos. Meas. Tech.*, 10, 3719-3742,  
1718 <https://doi.org/10.5194/amt-10-3719-2017>, 2017c.  
1719  
1720 Wiegner, M. and Geiß, A.: Aerosol profiling with the Jenoptik ceilometer CHM15kx, *Atmos.*  
1721 *Meas. Tech.*, 5, 1953-1964, <https://doi.org/10.5194/amt-5-1953-2012>, 2012.  
1722  
1723 Winterrath, T., T. P. Kurosu, A. Richter and J. P. Burrows, Enhanced O<sub>3</sub> and NO<sub>2</sub> in  
1724 thunderstorm clouds: convection or production?, *Geophys. Res. Lett.*, No. 26, pp. 1291-1294,  
1725 1999.  
1726  
1727 Wittrock, F., H. Oetjen, A. Richter, S. Fietkau, T. Medeke, A. Rozanov, J. P. Burrows  
1728 MAX-DOAS measurements of atmospheric trace gases in Ny-Ålesund - Radiative transfer  
1729 studies and their application, *Atmos. Chem. Phys.*, 4, 955-966, 2004  
1730  
1731 Zieger, P., Weingartner, E., Henzing, J., Moerman, M., de Leeuw, G., Mikkilä, J., Ehn, M.,  
1732 Petäjä, T., Clémer, K., van Roozendael, M., Yilmaz, S., Frieß, U., Irie, H., Wagner, T.,  
1733 Shaiganfar, R., Beirle, S., Apituley, A., Wilson, K., and Baltensperger, U.: Comparison of  
1734 ambient aerosol extinction coefficients obtained from in-situ, MAX-DOAS and LIDAR  
1735 measurements at Cabauw, *Atmos. Chem. Phys.*, 11, 2603-2624, [https://doi.org/10.5194/acp-](https://doi.org/10.5194/acp-11-2603-2011)  
1736 [11-2603-2011](https://doi.org/10.5194/acp-11-2603-2011), 2011.  
1737  
1738  
1739  
1740  
1741  
1742  
1743  
1744  
1745  
1746  
1747  
1748  
1749  
1750  
1751  
1752  
1753  
1754  
1755  
1756  
1757  
1758  
1759



1760  
1761  
1762  
1763

## Figures

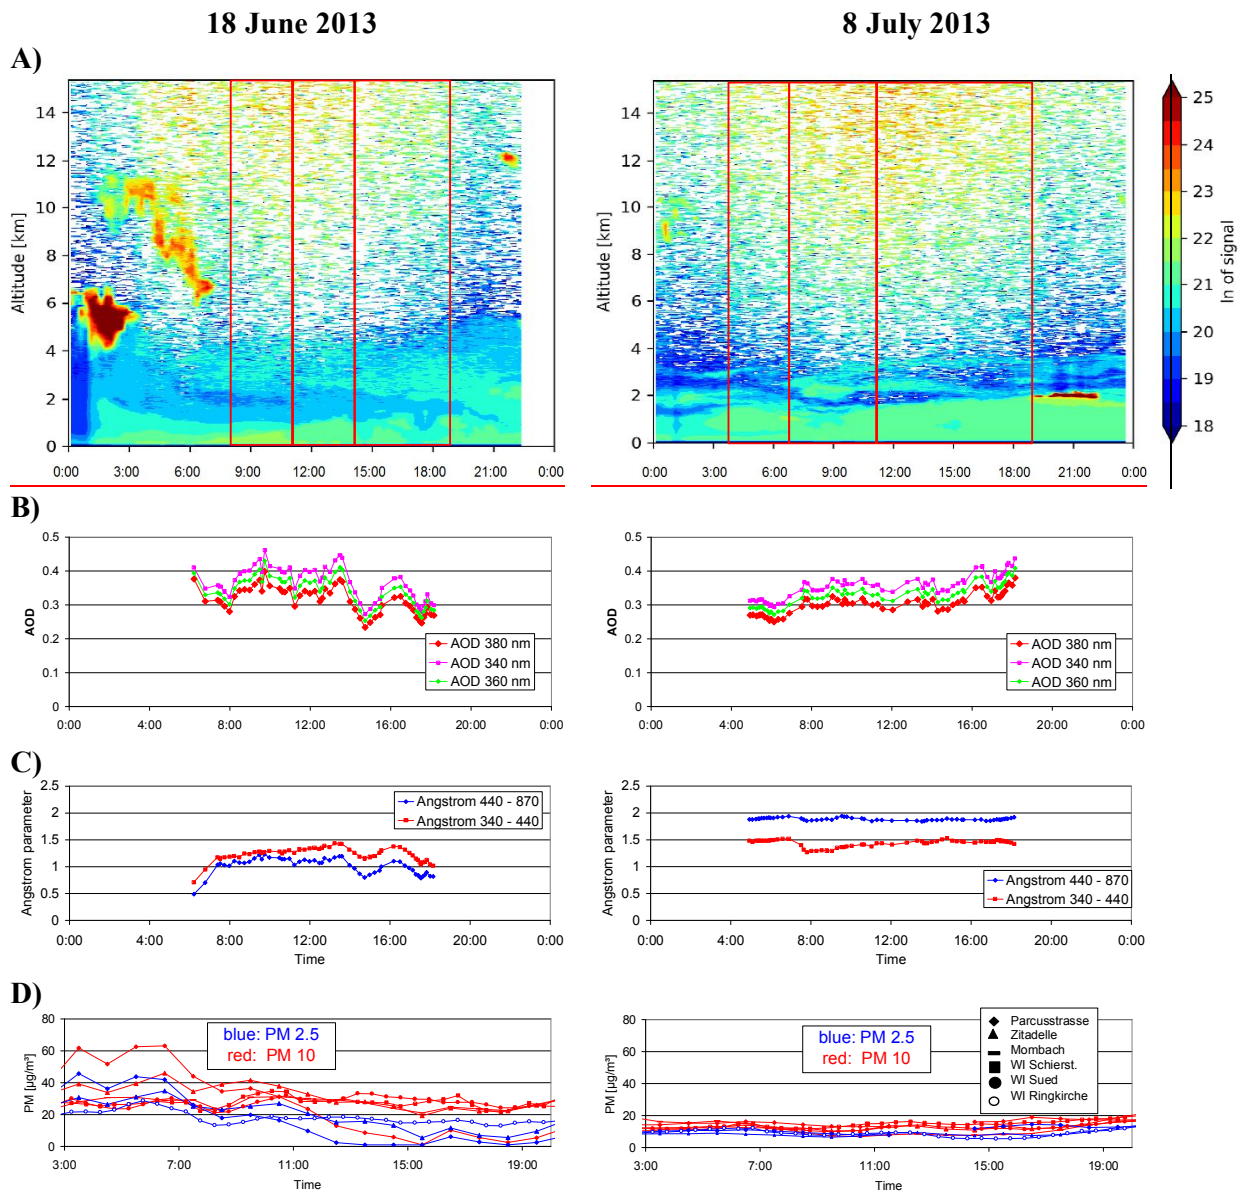

1764 Fig. 1 Various aerosol properties on the two selected days (left: 18 June 2013; right: 8 July  
1765 2013). A) Aerosol backscatter profiles from ceilometer measurements; B) AOD at 340, 360,  
1766 and 380 nm (360 values are interpolated from 340 and 380 nm) from AERONET sun  
1767 photometer measurements; C) Ångström parameters for two wavelength pairs (340 – 440 nm  
1768 and 440 – 870 nm) from AERONET sun photometer measurements; D) Surface in situ  
1769 measurements of PM<sub>2.5</sub> and PM<sub>10</sub> measured at different air quality monitoring stations in  
1770 Mainz and the nearby city of Wiesbaden .

1771  
1772  
1773  
1774  
1775

1776  
1777  
1778

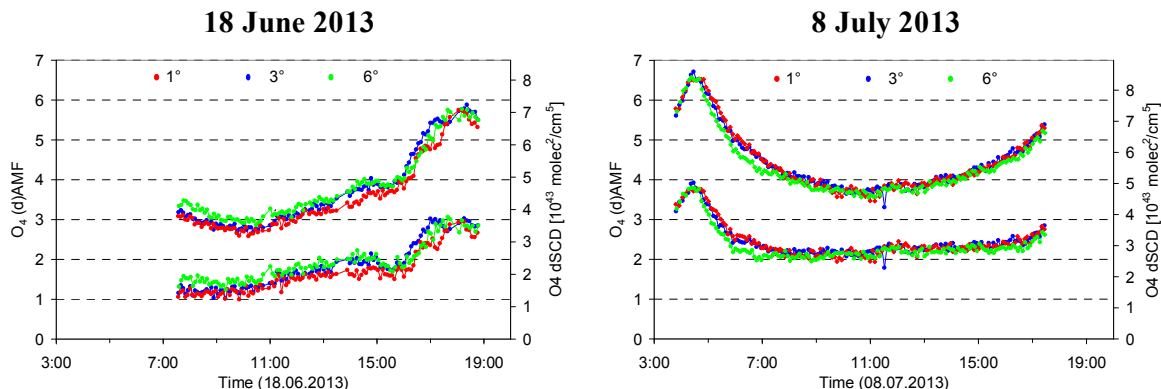

1779 Fig. 2 O<sub>4</sub> AMFs (upper lines) and dAMFs (lower lines) for 1°, 3°, and 6° elevation angles  
1780 derived from the MPIC MAX-DOAS measurements on the two selected days. Interestingly,  
1781 on 18 June the lowest values are in general found for the lowest elevation angles, which is an  
1782 indication for the high aerosol load close to the surface. The y-axis on the right side shows the  
1783 corresponding O<sub>4</sub> (d)SCDs for O<sub>4</sub> VCDs of  $1.23 \cdot 10^{43} \text{ molec}^2/\text{cm}^5$  and of  $1.28 \cdot 10^{43}$   
1784  $\text{molec}^2/\text{cm}^5$  for 18 June and 08 July, respectively (see section 4.1.2).  
1785  
1786

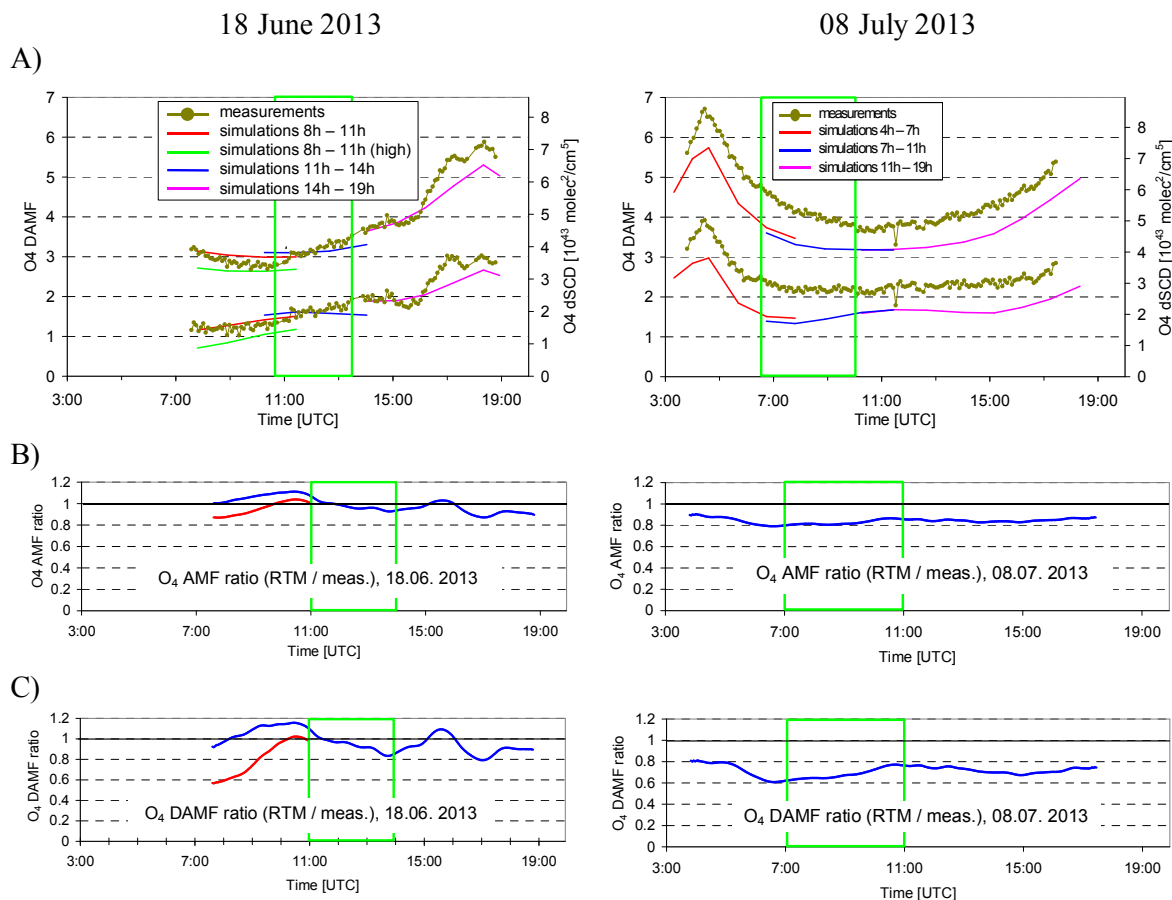

1787 Fig. 3 A) Comparison of O<sub>4</sub> (d)AMFs from MAX-DOAS measurements and forward model  
1788 simulations for the two selected days. The green rectangle indicates the middle periods on  
1789 both days, which are the focus of the quantitative comparison. The green line on 18 June

1790 represents forward model results for a modified aerosol profile (see text). The y-axis on the  
 1791 right side shows the corresponding O<sub>4</sub> (d)SCDs for O<sub>4</sub> VCDs of  $1.23 \cdot 10^{43}$  molec<sup>2</sup>/cm<sup>5</sup> and of  
 1792  $1.28 \cdot 10^{43}$  molec<sup>2</sup>/cm<sup>5</sup> for 18 June and 08 July, respectively (see section 4.1.2). In B) and C)  
 1793 the ratios of the simulated and measured AMFs and dAMFs are shown, respectively. The red  
 1794 line on 18 June represents the ratios for the modified aerosol scenario.  
 1795

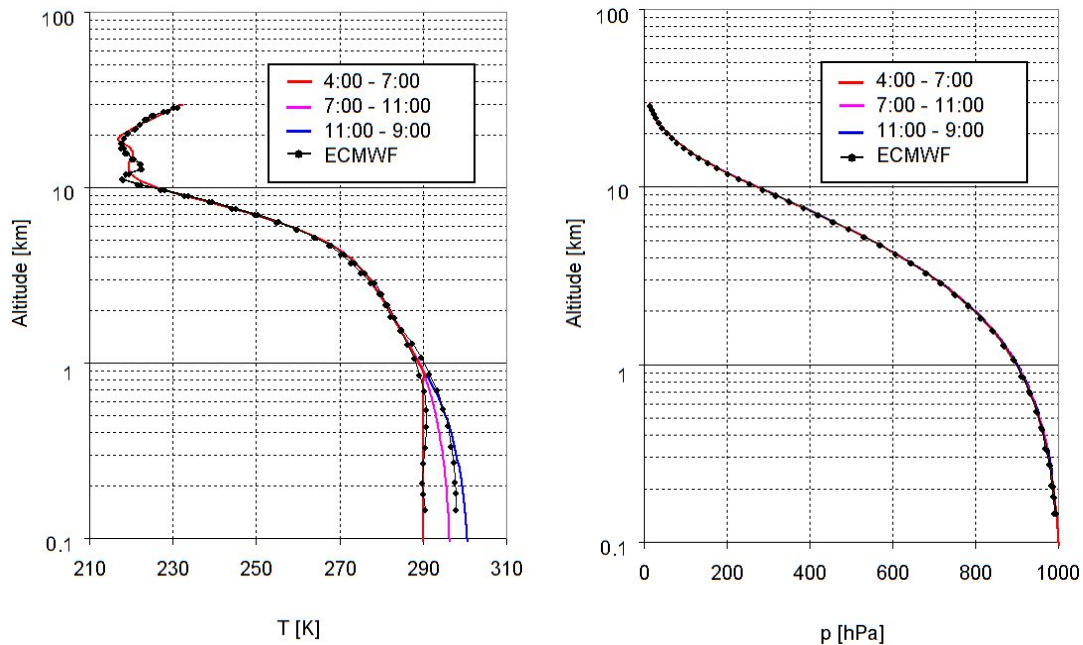

1796 Fig. 4 Extracted temperature (left) and pressure (right) profiles for the three periods on 8 July  
 1797 2013. Also shown are ECMWF profiles above Mainz for 6:00 and 18:00. To better account  
 1798 for the diurnal variation of the temperatures near the surface, below 1 km the temperature is  
 1799 linearly interpolated between the surface measurements and the ECMWF temperatures at 1  
 1800 km (for details see text). Note that the altitude is given relative to the height of the  
 1801 measurement site (150 m).  
 1802

**18 June 14:00 – 19:00**

**8 July 4:00 – 7:00**

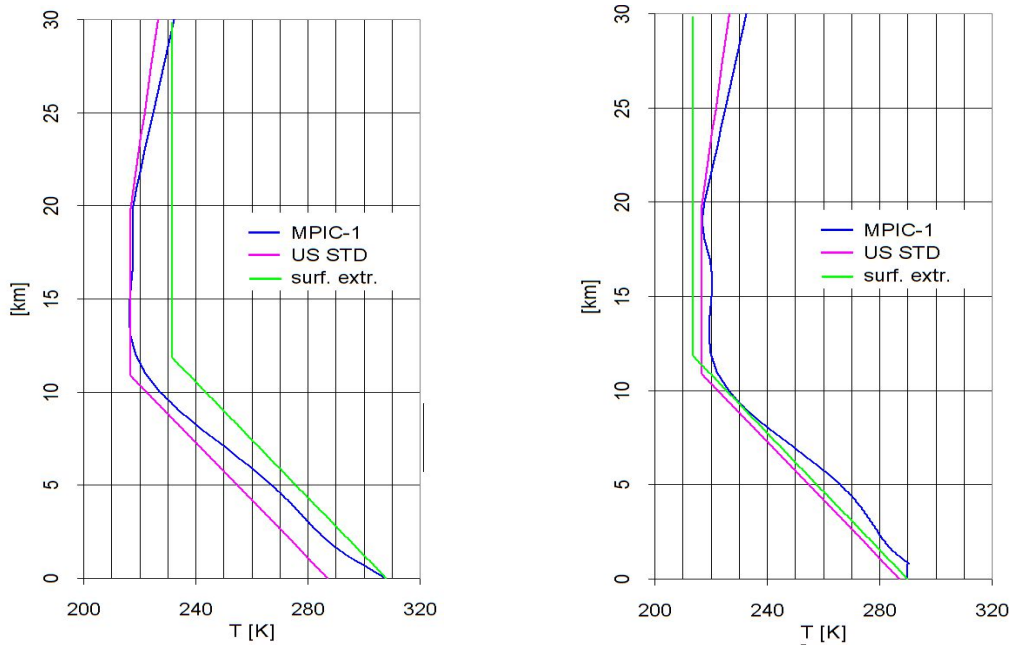

1803 Fig. 5 Temperature profiles extracted in different ways for two periods (Left: 18 June 14:00 –  
 1804 19:00; right: 8 July 4:00 – 7:00). The blue profiles are extracted from in situ measurements and ECMWF profiles as described in the text. The green profiles are extracted from the  
 1805 surface temperatures and assuming a constant lapse rate of  $-6.5\text{K} / \text{km}$  up to 12 km and a  
 1806 constant temperature above. The pink curves represent the temperature profile from the US  
 1807 standard atmosphere.  
 1808  
 1809

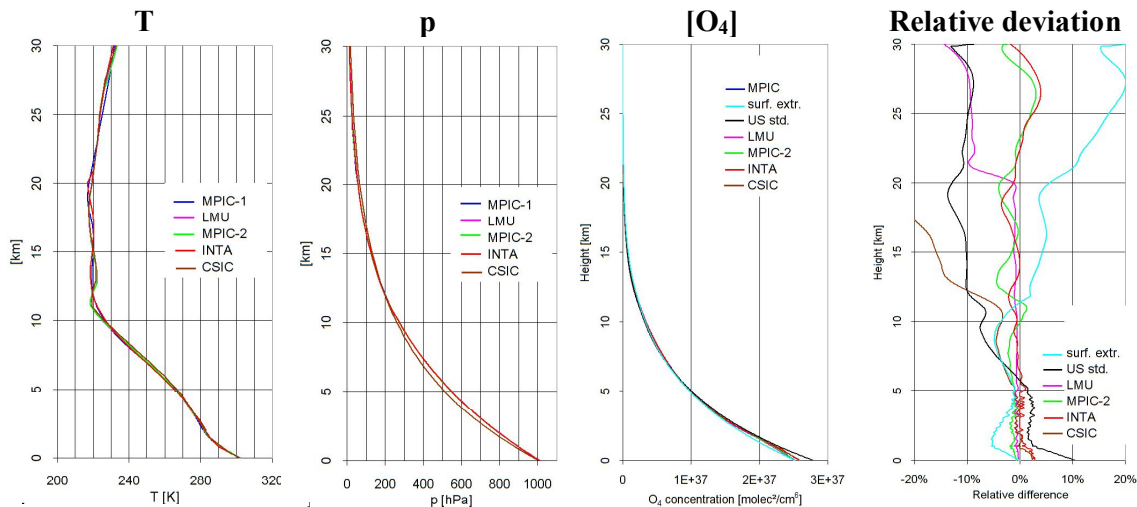

1810 Fig. 6 Comparison of the vertical profiles of temperature, pressure and  $\text{O}_4$  concentration  
 1811 (expressed as the square of the  $\text{O}_2$  concentration) for 8 July, 11:00 – 19 :00, extracted by the  
 1812 different groups. In the right figure the relative deviations of the  $\text{O}_4$  concentration compared  
 1813 to the MPIC standard extraction are shown. There, also the profiles derived from the  
 1814 extrapolation from the surface values and the US standard atmosphere are included.  
 1815  
 1816

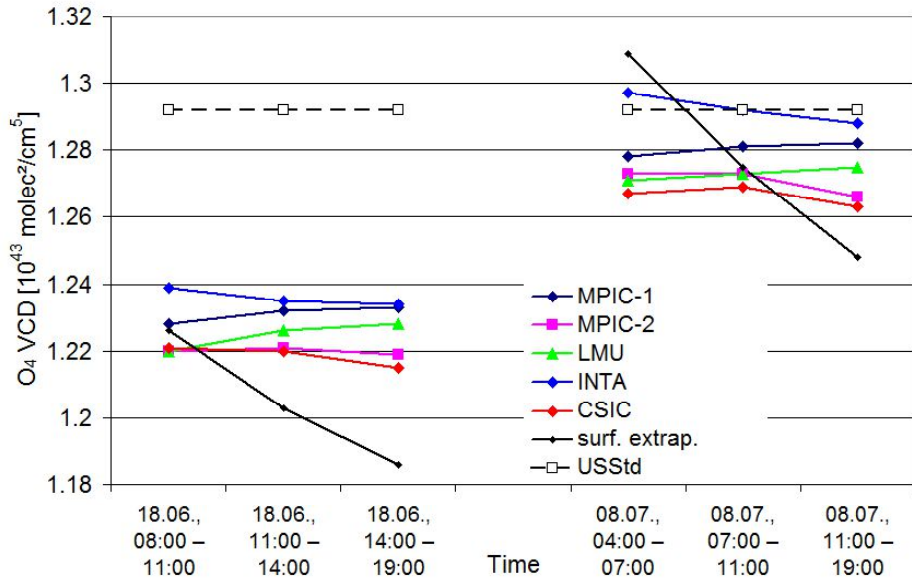

1817  
1818  
1819  
1820  
1821  
1822  
1823  
1824  
1825  
1826  
1827  
1828  
1829

Fig. 7 Comparison of the O<sub>4</sub> VCDs for the selected periods on both days calculated from the profiles extracted by the different groups. Also the results for the profiles extrapolated from the surface values and the US standard atmosphere are shown.

Ceilometer backscatter profiles at 1064 nm (hourly averages)

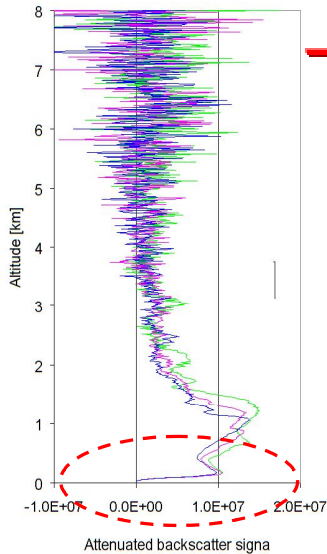

Extinction profiles at 360 nm derived by different groups

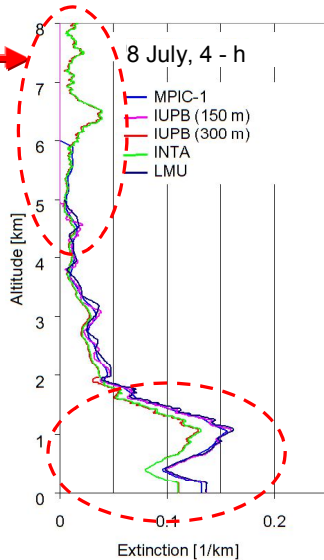

The backscatter profiles are converted into extinction profiles by scaling with the AOD from the sun photometer.

The self attenuation of the aerosol is accounted for.

Below 180m, the profiles are extrapolated (constant value, or constant or double slope).

1830  
1831  
1832

Fig. 8 Left: Hourly averaged backscatter profiles from the ceilometer measurements for the period 4:00 – 7:00 on 8 July 2013. Below 180 m the values rapidly decrease to zero due to the

1833 missing overlap between the outgoing beam and the field of view of the telescope. Right:  
 1834 Aerosol extinction profiles extracted by the different groups from the ceilometer profiles  
 1835 (assuming a constant extinction below 180 m). The red circles indicate the height intervals  
 1836 with the largest deviations (IUPB 150 m and IUPB 300 m indicate profile extractions with  
 1837 different widths of the smoothing kernels: Hanning windows of 150 and 300 m, respectively).  
 1838  
 1839  
 1840  
 1841  
 1842  
 1843  
 1844  
 1845  
 1846  
 1847  
 1848  
 1849  
 1850  
 1851  
 1852  
 1853  
 1854  
 1855  
 1856  
 1857  
 1858  
 1859  
 1860  
 1861  
 1862

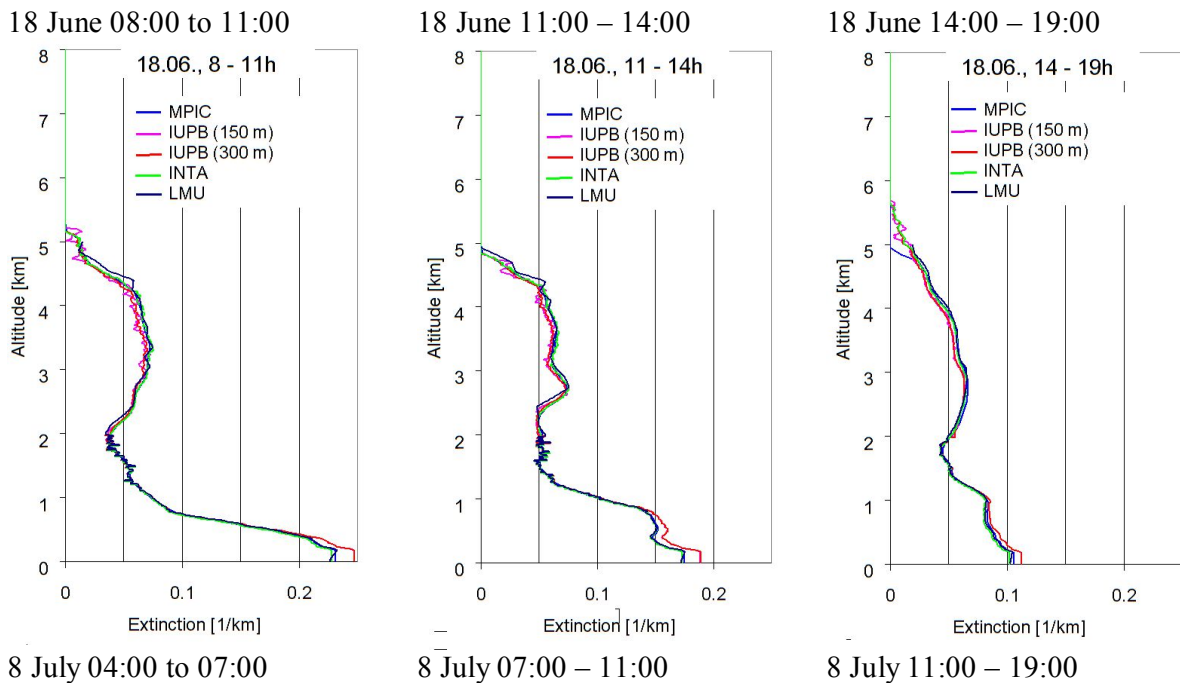

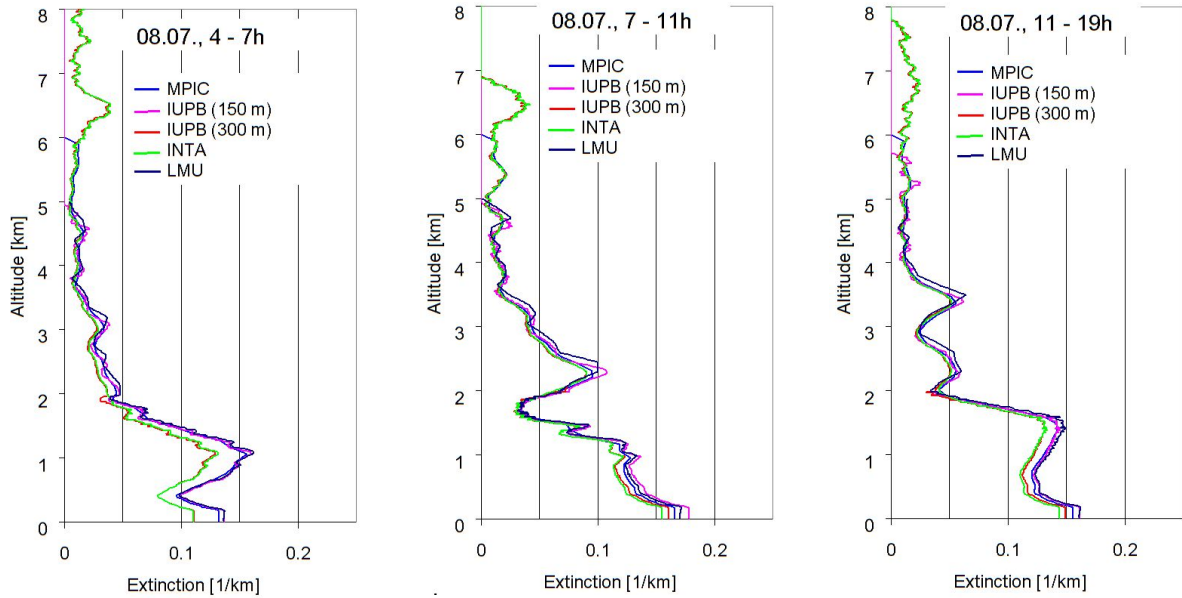

1863 Fig. 9 Comparison of the aerosol extinction profiles extracted by the different groups for all  
 1864 three periods on both days.  
 1865

1866  
 1867  
 1868  
 1869  
 1870  
 1871  
 1872  
 1873  
 1874  
 1875  
 1876

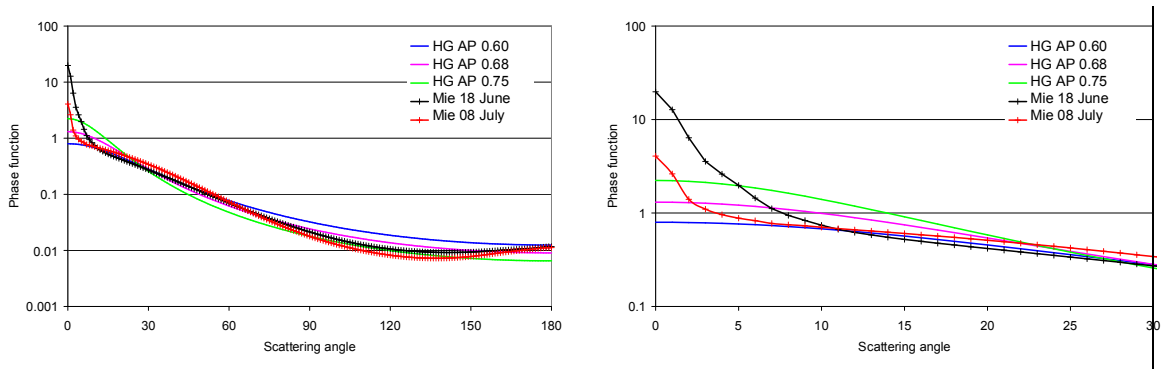

1877 Fig. 10 Comparison of different aerosol phase functions used in the radiative transfer  
 1878 simulations. The right figure is a zoom of the left figure.  
 1879

1880  
 1881  
 1882

Real measurements  
 $2.71 \cdot 10^{43} \text{ molec}^2/\text{cm}^5$

Synthetic spectra with noise  
 $2.00 \cdot 10^{43} \text{ molec}^2/\text{cm}^5$

Synthetic spectra without noise  
 $1.84 \cdot 10^{43} \text{ molec}^2/\text{cm}^5$

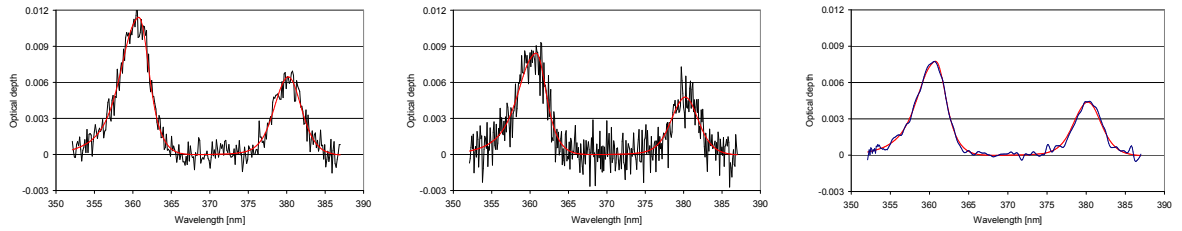

1883 Fig. 11 Spectral analysis results for a real measurement from the MPIC instrument (left) and a  
 1884 synthetic spectrum with and without noise. Spectra are taken from 8 July 2013 at 11:26  
 1885 (elevation angle = 1°). The derived O<sub>4</sub> dSCD is shown above the individual plots.  
 1886  
 1887  
 1888  
 1889  
 1890  
 1891  
 1892  
 1893  
 1894  
 1895  
 1896  
 1897  
 1898  
 1899  
 1900  
 1901  
 1902  
 1903  
 1904  
 1905  
 1906

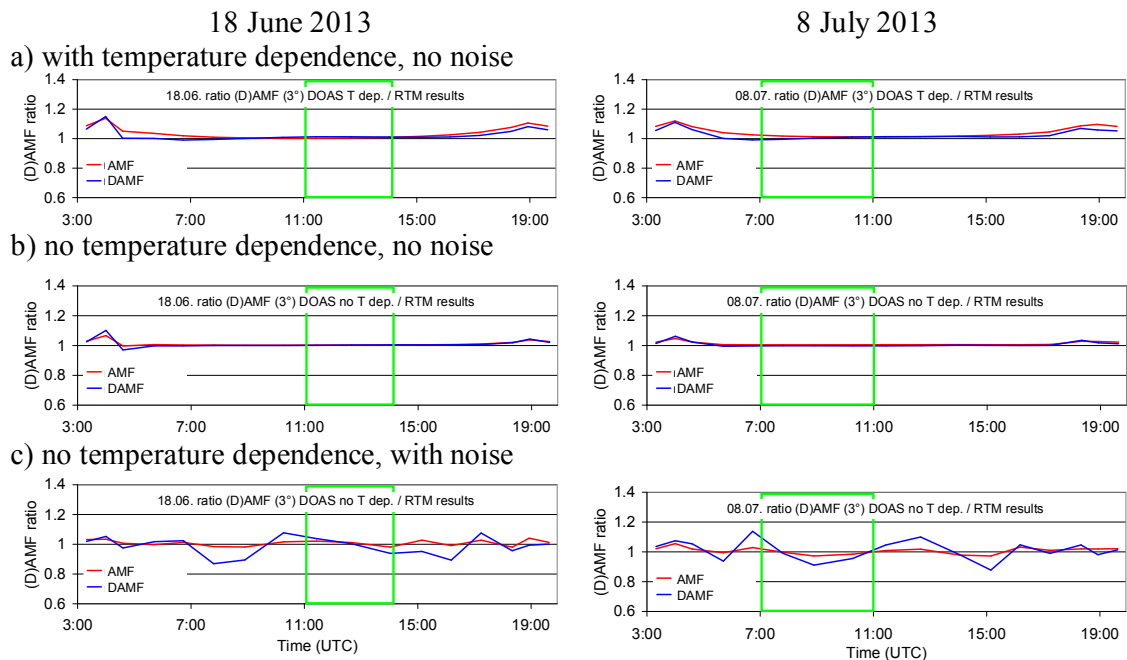



1907  
1908  
1909  
1910  
1911  
1912  
1913

Fig. 12 Ratio of the O<sub>4</sub> (d)AMFs derived from synthetic spectra versus those obtained from radiative transfer simulations at 360 nm for both selected days.

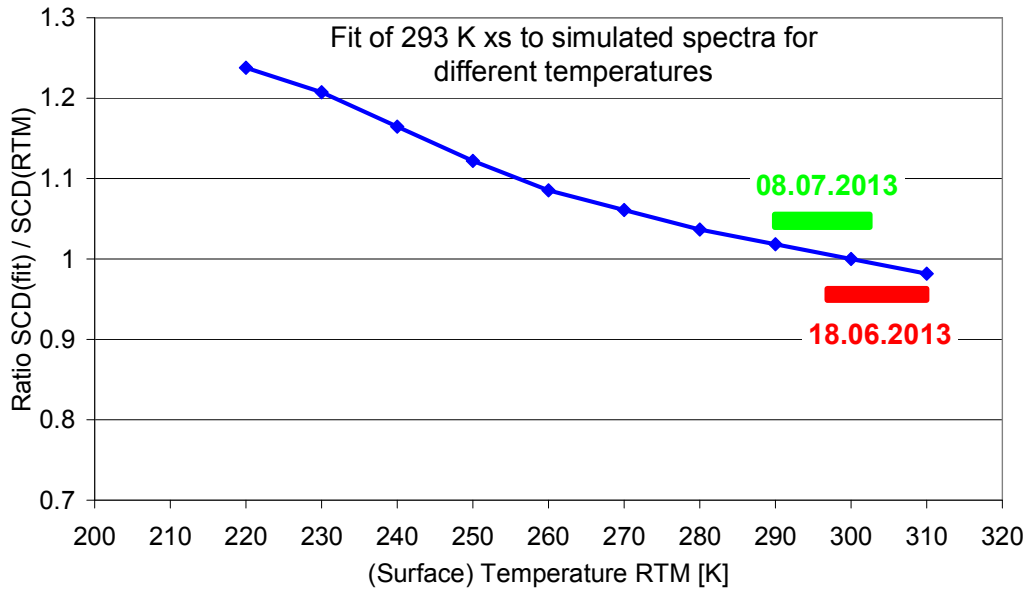

1914  
1915  
1916  
1917  
1918  
1919  
1920  
1921  
1922  
1923  
1924

Fig. 13 Ratio of the O<sub>4</sub> dAMF obtained from simulated spectra for different surface temperatures by the corresponding O<sub>4</sub> dAMFs derived from radiative transfer simulations. The results represent MAX-DOAS observations at low elevation angles (2° to 3°).

1925

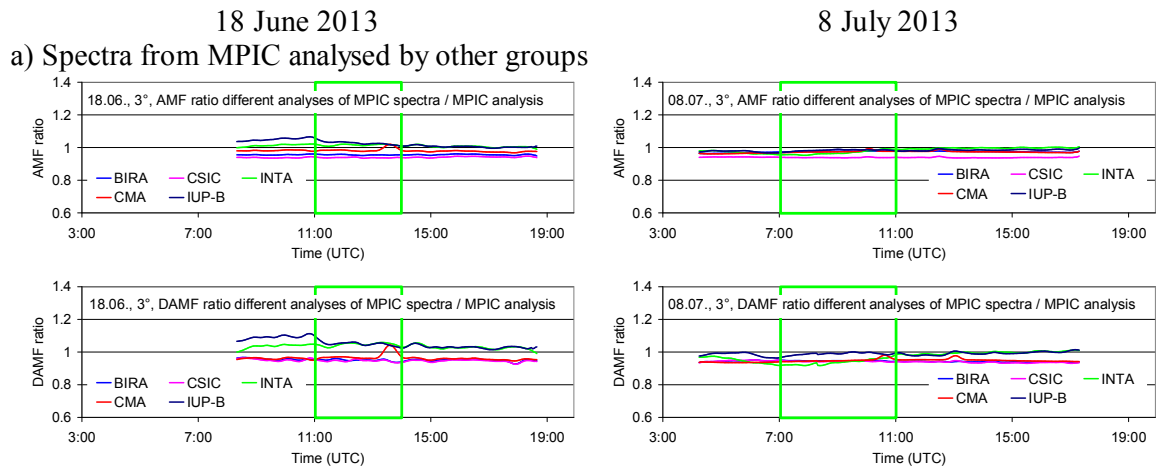

1926  
1927

b) Spectra from other groups analysed by MPIC (all analyses for 335 – 374 nm)

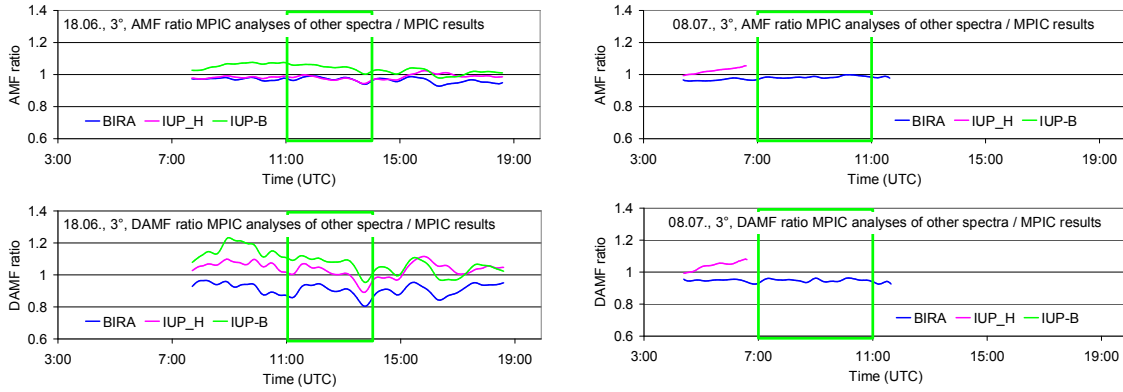

1928  
1929

c) Spectra from other groups analysed by the same groups

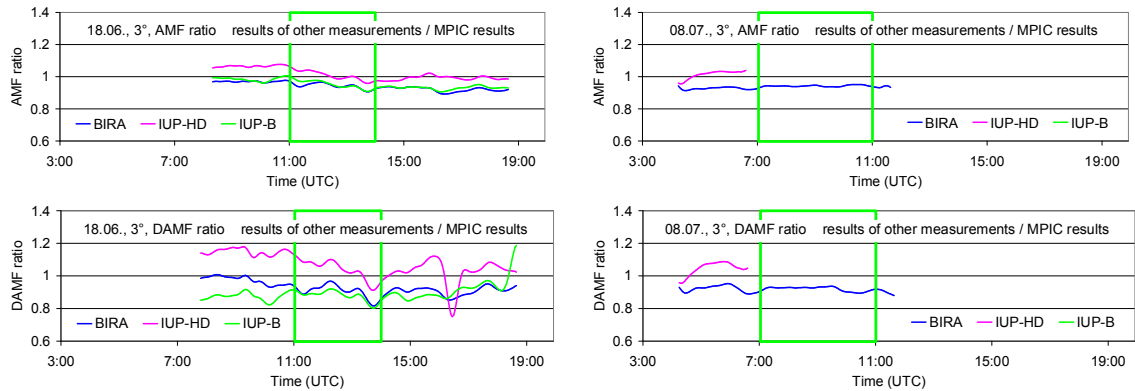

1930  
1931  
1932  
1933  
1934  
1935  
1936  
1937  
1938  
1939  
1940

Fig. 14 a) Ratio of the O<sub>4</sub> (d)AMFs derived from MPIC spectra when analysed by other groups versus those analysed by MPIC for both selected days; b) Ratio of the O<sub>4</sub> (d)AMFs derived from spectra measured and analysed by other groups (using different wavelength ranges and settings) versus those for the MPIC instrument analysed by MPIC; c) Ratio of the O<sub>4</sub> (d)AMFs derived from spectra measured by other groups but analysed by MPIC versus those for the MPIC instrument analysed by MPIC (using the spectral range 335 – 374 nm for all instruments).

18 June 2013

8 July 2013

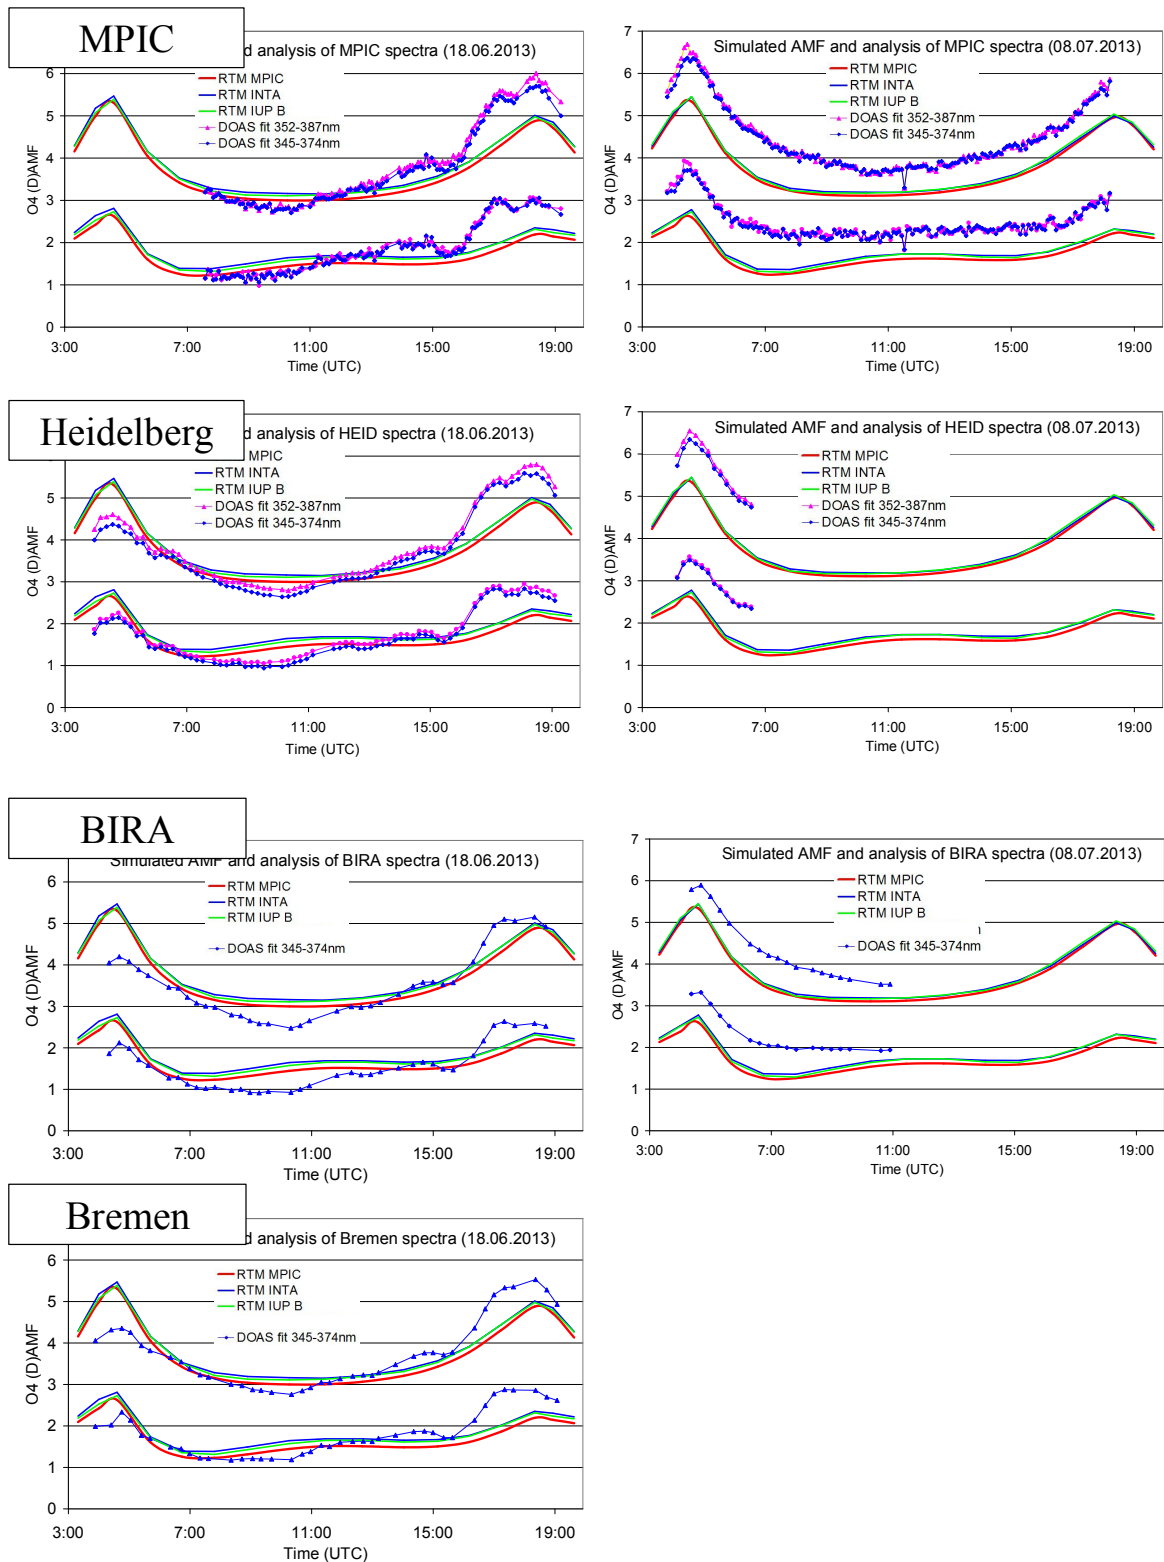

1941

1942  
 1943  
 1944  
 1945  
 1946  
 1947

Fig. 15 Comparison of measured and simulated O<sub>4</sub> (d)AMFs for both selected days. Measurements are from 4 different instruments, but analysed by MPIC using the standard settings (see Table 7). Simulations are performed by three different groups using Mie phase functions and otherwise the standard settings (see Table 6).

1948 **Appendix A1 Settings used for the simulation of synthetic spectra**

1949

1950

1951 Table A1 Vertical resolution used in radiative transfer simulations for different altitude  
1952 ranges.

| Lower boundary [km] | Upper boundary [km] | Vertical resolution [km] |
|---------------------|---------------------|--------------------------|
| 0                   | 0.5                 | 0.02                     |
| 0.5                 | 2                   | 0.1                      |
| 2                   | 12                  | 0.2                      |
| 12                  | 25                  | 1                        |
| 25                  | 45                  | 2                        |
| 45                  | 100                 | 5                        |
| 100                 | 1000                | 900                      |

1953

1954

1955

1956

1957 Table A2 Dependence of SZA and relative azimuth angle on time (UTC) for the standard  
1958 viewing direction (51° with respect to North).

| Time (UTC) | SZA | RAZI  |
|------------|-----|-------|
| 03:19      | 90  | -0.1  |
| 04:00      | 85  | 7.7   |
| 04:36      | 80  | 14.2  |
| 05:42      | 70  | 26    |
| 06:44      | 60  | 37.5  |
| 07:48      | 50  | 50.1  |
| 08:54      | 40  | 66.2  |
| 10:16      | 30  | 94.6  |
| 11:26      | 26  | 129   |
| 12:40      | 30  | 163.3 |
| 14:02      | 40  | 191.8 |
| 15:09      | 50  | 207.9 |
| 16:11      | 60  | 220.5 |
| 17:14      | 70  | 232   |
| 18:20      | 80  | 243.8 |
| 18:56      | 85  | 250.3 |
| 19:38      | 90  | 258   |

1959

1960

1961

1962

1963

1964

1965

1966

1967

1968

1969

1970

1971 Table A3 Trace gas profiles and cross sections used for the simulation of the synthetic  
 1972 spectra.

| Trace gas       | Vertical profile                                                                                                                                                                                                                                                                                                                                | Cross section (reference and T)                                |
|-----------------|-------------------------------------------------------------------------------------------------------------------------------------------------------------------------------------------------------------------------------------------------------------------------------------------------------------------------------------------------|----------------------------------------------------------------|
| O <sub>4</sub>  | Derived from temperature and pressure profiles during.<br>18.06.: average profiles 11:00 – 14:00<br>08.07.: average profiles 7:00 – 11:00                                                                                                                                                                                                       | Thalman and Volkamer (2013)<br>(203, 223, 253, 273, 293 K)*    |
| HCHO            | 18.06.: 0-1000m, constant concentration of $2 \cdot 10^{11}$ molec/cm <sup>3</sup> (about 8 ppb)<br>08.07.: 0-1000m, constant concentration of $1 \cdot 10^{11}$ molec/cm <sup>3</sup> (about 4 ppb)                                                                                                                                            | Meller and Moortgat (2000)<br>(298 K)                          |
| NO <sub>2</sub> | Troposphere<br>18.06.: 0-500m, constant concentration of $4 \cdot 10^{11}$ molec/cm <sup>3</sup> (about 16 ppb)<br>08.07.: 0-500m, constant concentration of $2 \cdot 10^{11}$ molec/cm <sup>3</sup> (about 8 ppb)<br>Stratosphere:<br>Gaussian profile with maximum at 25 km, and FWHM of 16 km, VCD = $5 \cdot 10^{15}$ molec/cm <sup>2</sup> | Vandaele et al. (1997)<br>(220, 294 K)                         |
| O <sub>3</sub>  | Troposphere (0-8km):<br>constant concentration $6 \cdot 10^{11}$ molec/cm <sup>3</sup> (about 24 ppb)<br>Stratosphere:<br>Gaussian profile with maximum at 22 km, and FWHM of 15 km, VCD = 314 DU                                                                                                                                               | Serdyuchenko et al. (2014)<br>(193 – 293 K in steps of 10 K)** |

1973 \*The temperature dependence is either considered or a constant temperature of 293 K is  
 1974 assumed (see text for details).

1975 \*\*The temperature dependence was parameterised according to Paur and Bass (1984).

1976  
 1977  
 1978  
 1979  
 1980  
 1981

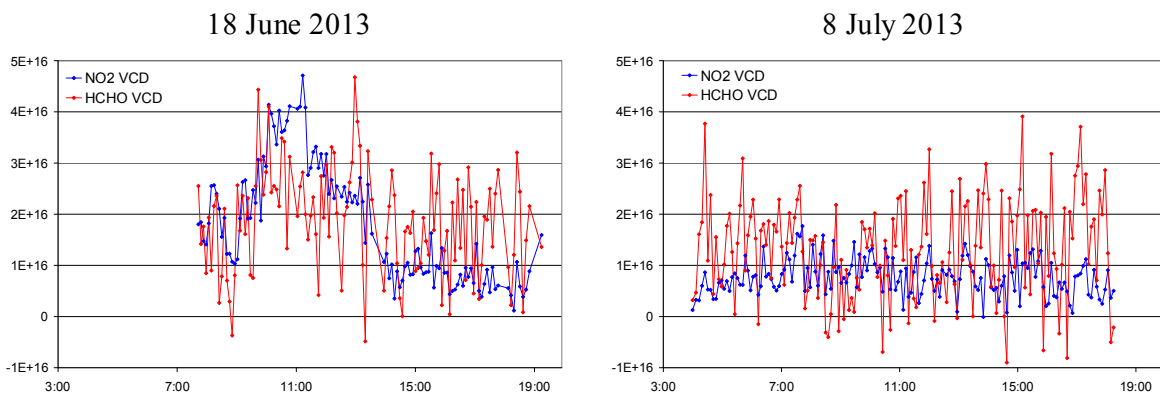

1982 Fig. A1 Tropospheric VCDs of NO<sub>2</sub> (blue) and HCHO (red) derived from measurements at  
 1983 30° elevation using the geometric approximation.

1984  
 1985

1986 **Appendix A2 Comparison of measured and simulated O<sub>4</sub> (d)AMFs for all azimuth and**  
1987 **elevation angles of the MPIC MAX-DOAS measurements.**  
1988

1989 The settings for the simulation of the synthetic spectra are given in Table 6 and Tables A1,  
1990 A2, and A3 in appendix 1. Measurements are analysed using the standard settings (see Table  
1991 7).  
1992  
1993

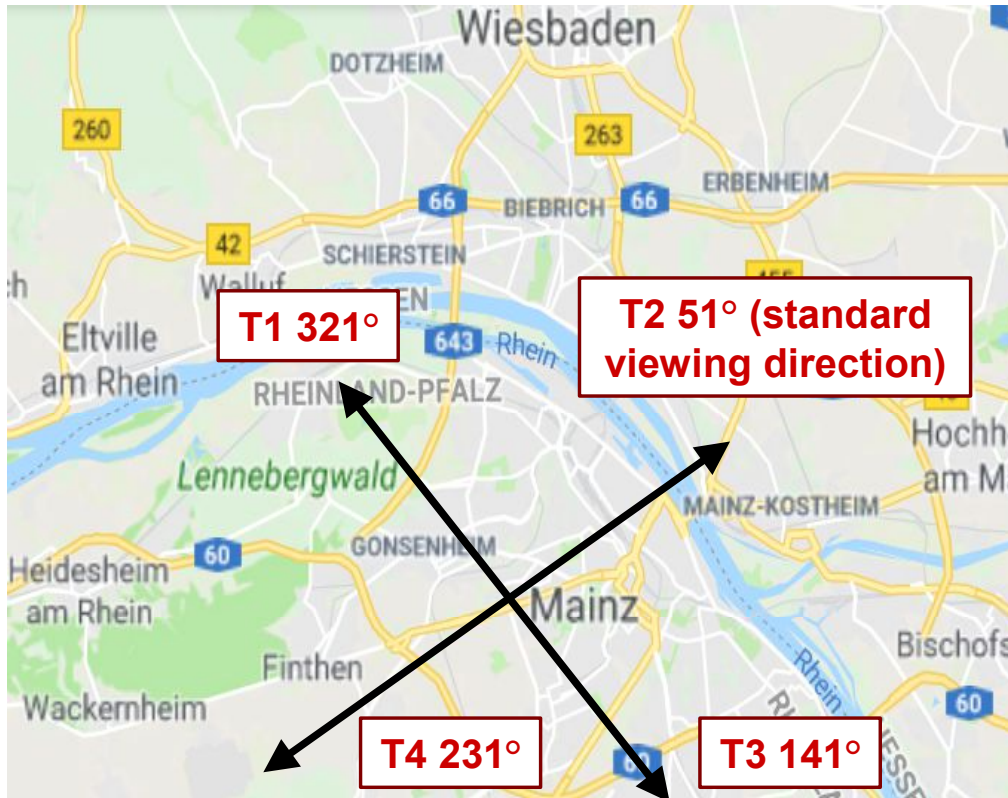

1994 Fig. A2 Azimuth viewing directions of the 4 telescopes (T1 to T4) of the MPIC MAX-DOAS  
1995 instrument. The azimuth angles are defined with respect to North (map: © google maps).  
1996  
1997  
1998

### T1 North-West

For T1 and T4 azimuth direction, no measurements at 1° elevation were possible due to obstacles.

### T2 North-East

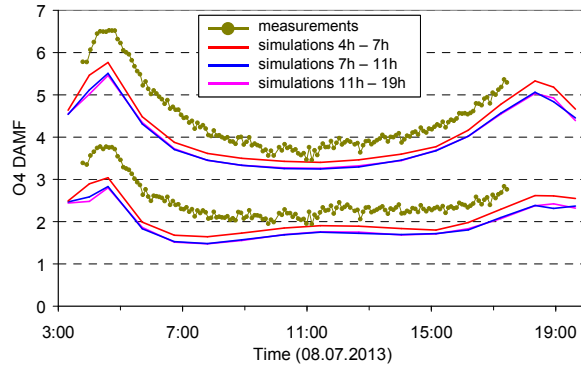

### T4 South-West

For T1 and T4 azimuth direction, no measurements at 1° elevation were possible due to obstacles.

### T3 South-East

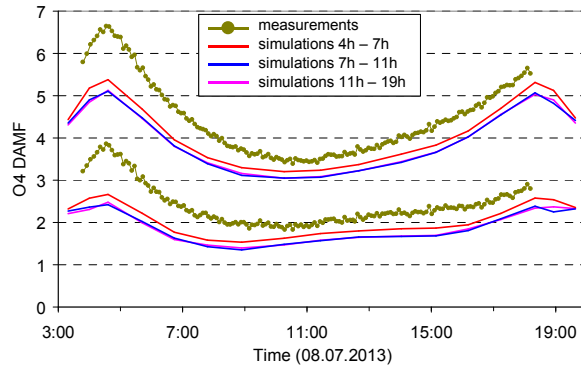

1999  
2000  
2001  
2002

Fig. A3a Comparison results for 1° elevation angles on 8 July 2013. The upper lines indicate the O<sub>4</sub> AMFs, the lower lines the O<sub>4</sub> dAMFs (see also Fig. 2 and 3).

### T1 North-West

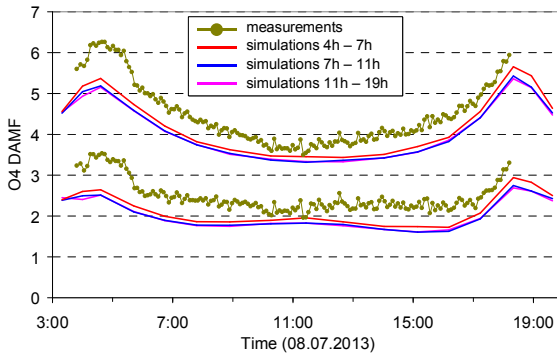

### T2 North-East

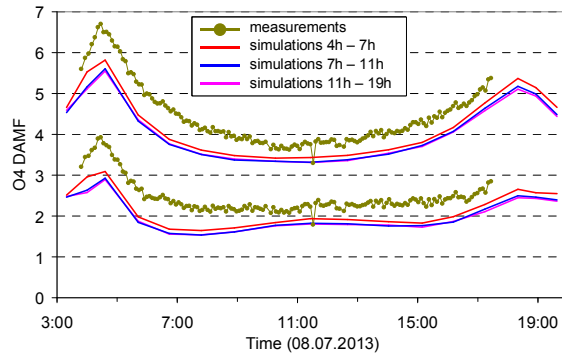

### T4 South-West

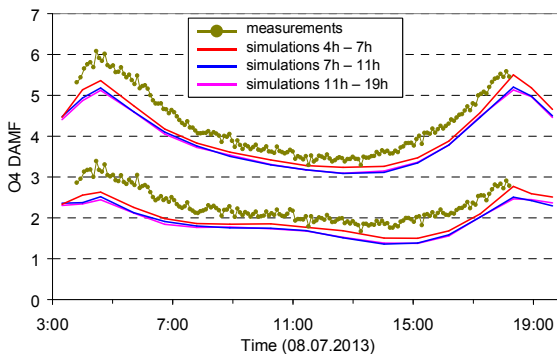

### T3 South-East

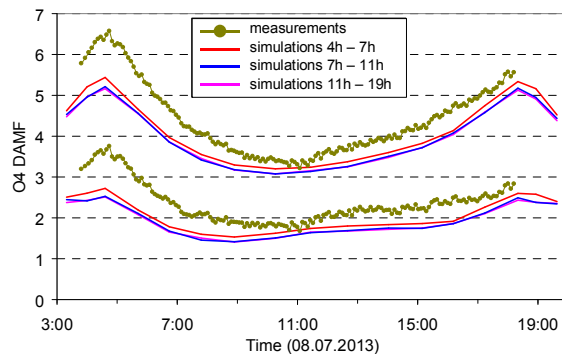

2003  
2004

Fig. A3b Comparison results for 3° elevation angles on 8 July 2013.

2005

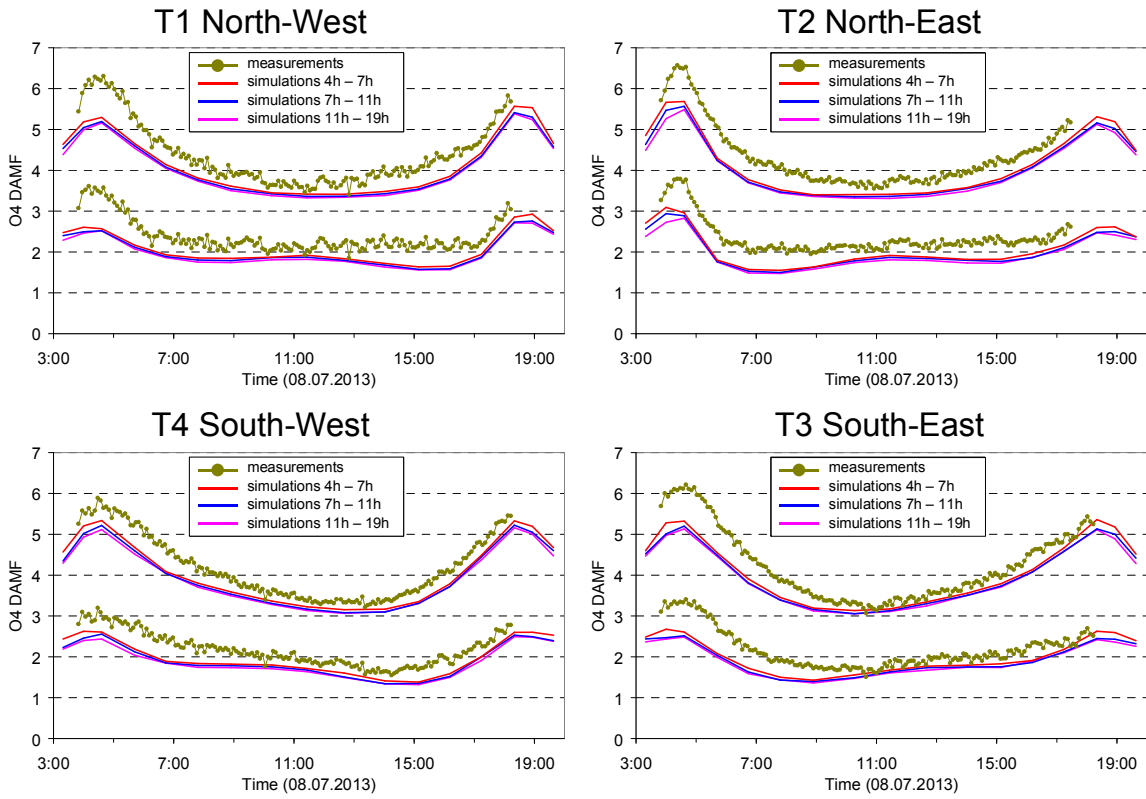

2006  
2007  
2008

Fig. A3c Comparison results for 6° elevation angles on 8 July 2013.

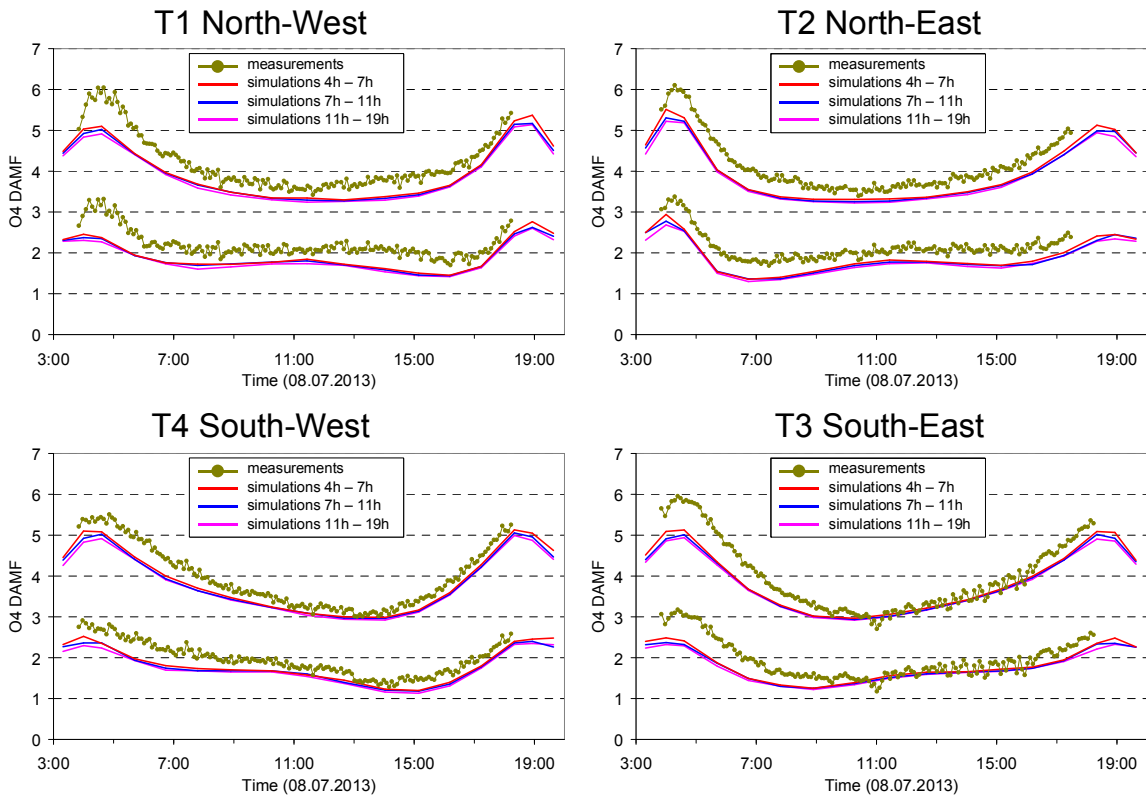

2009  
2010  
2011

Fig. A3d Comparison results for 10° elevation angles on 8 July 2013.



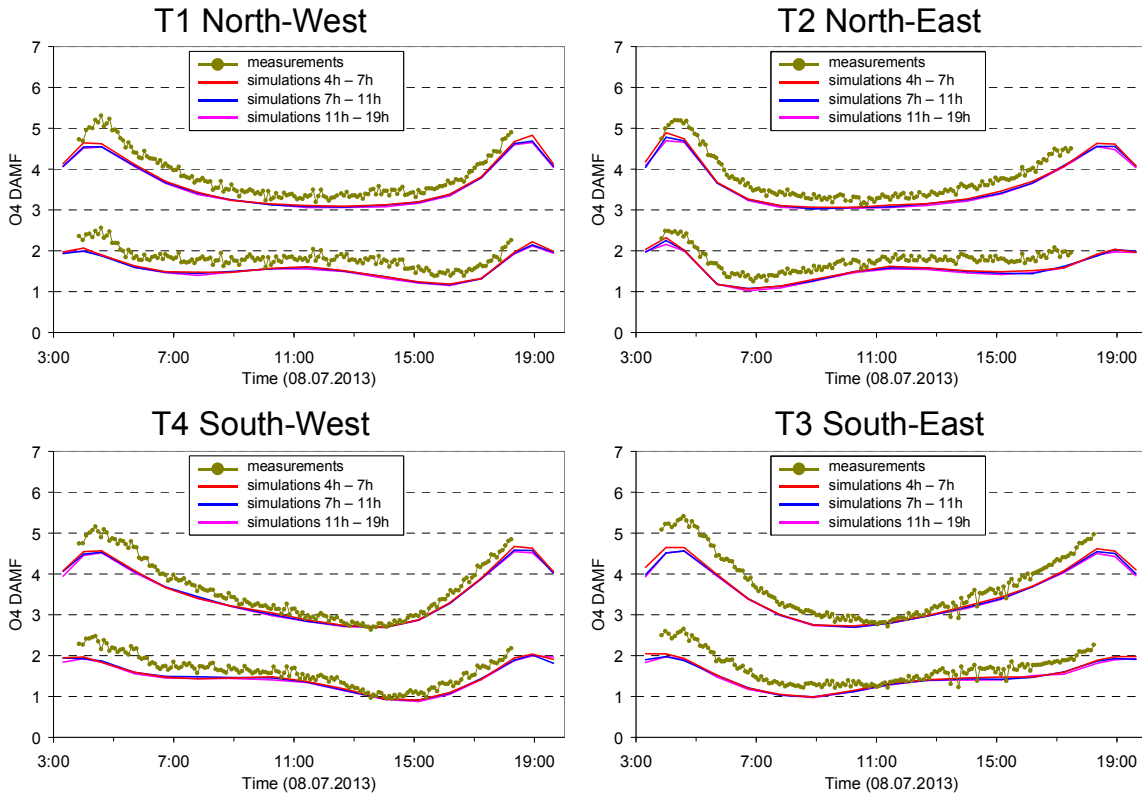

Fig. A3e Comparison results for 15° elevation angles on 8 July 2013.

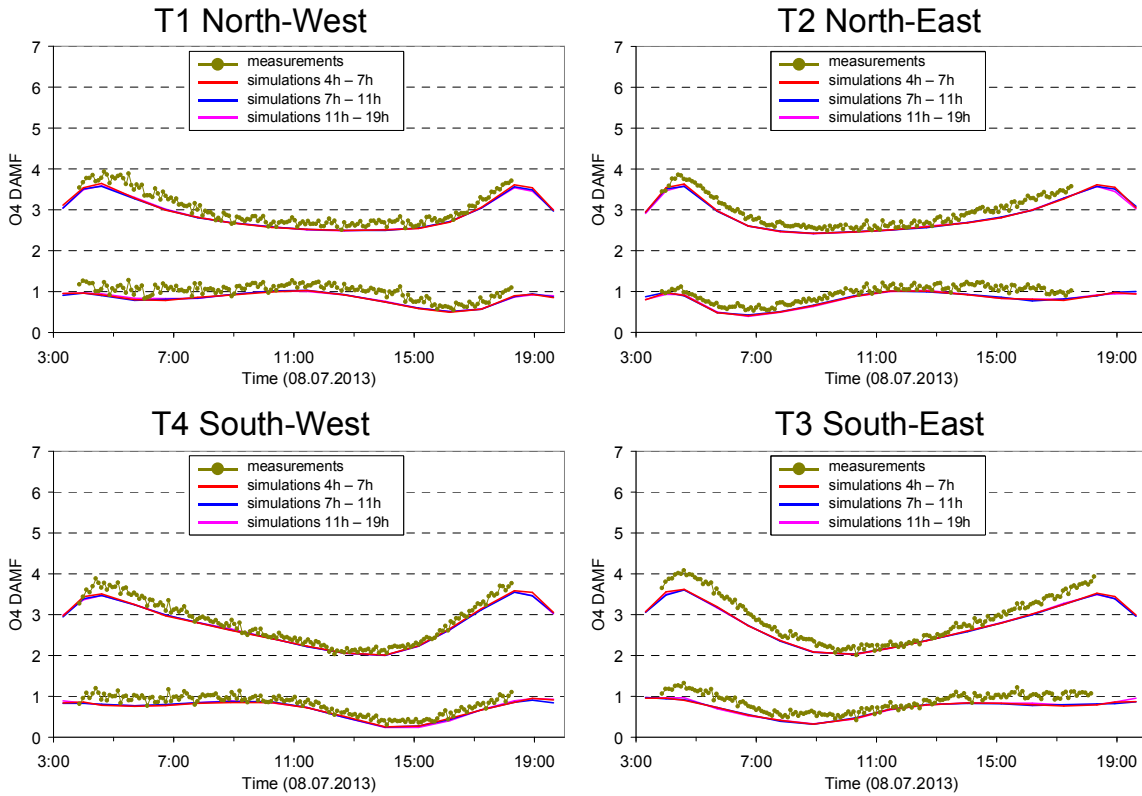

Fig. A3f Comparison results for 30° elevation angles on 8 July 2013.

2012  
2013  
2014

2015  
2016  
2017  
2018

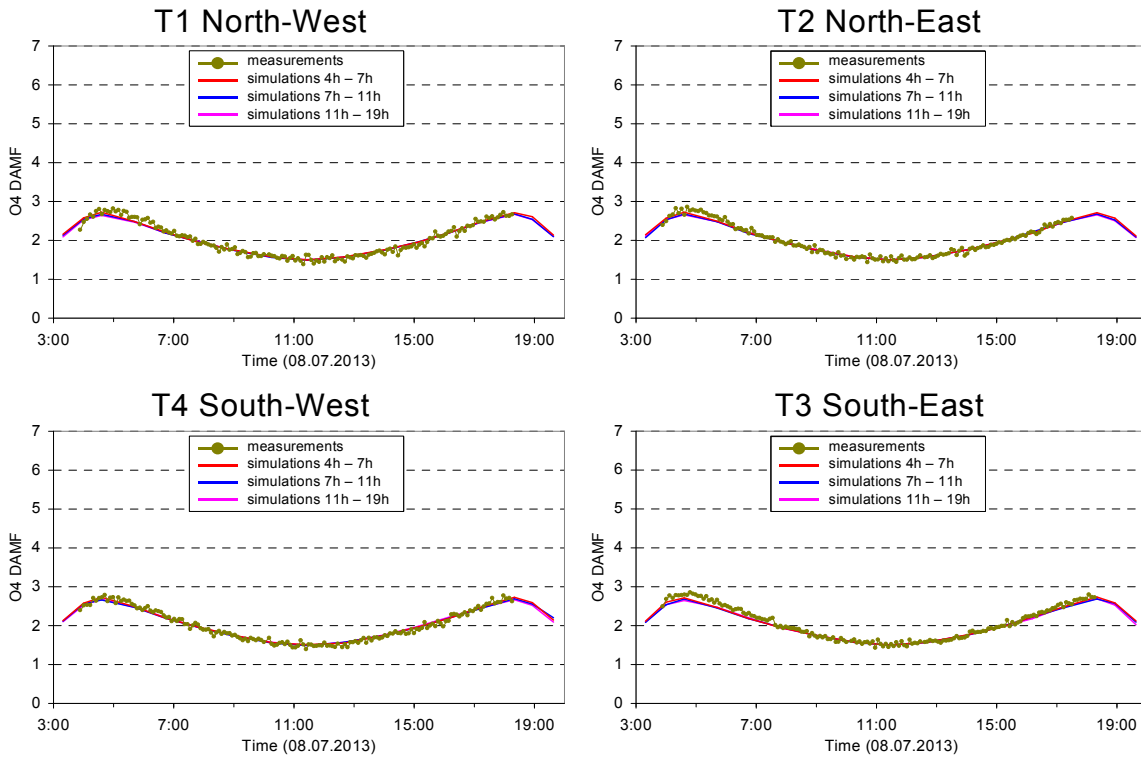

Fig. A3g Comparison results (only O<sub>4</sub> AMFs) for 90° elevation angles on 8 July 2013.

2019  
2020  
2021

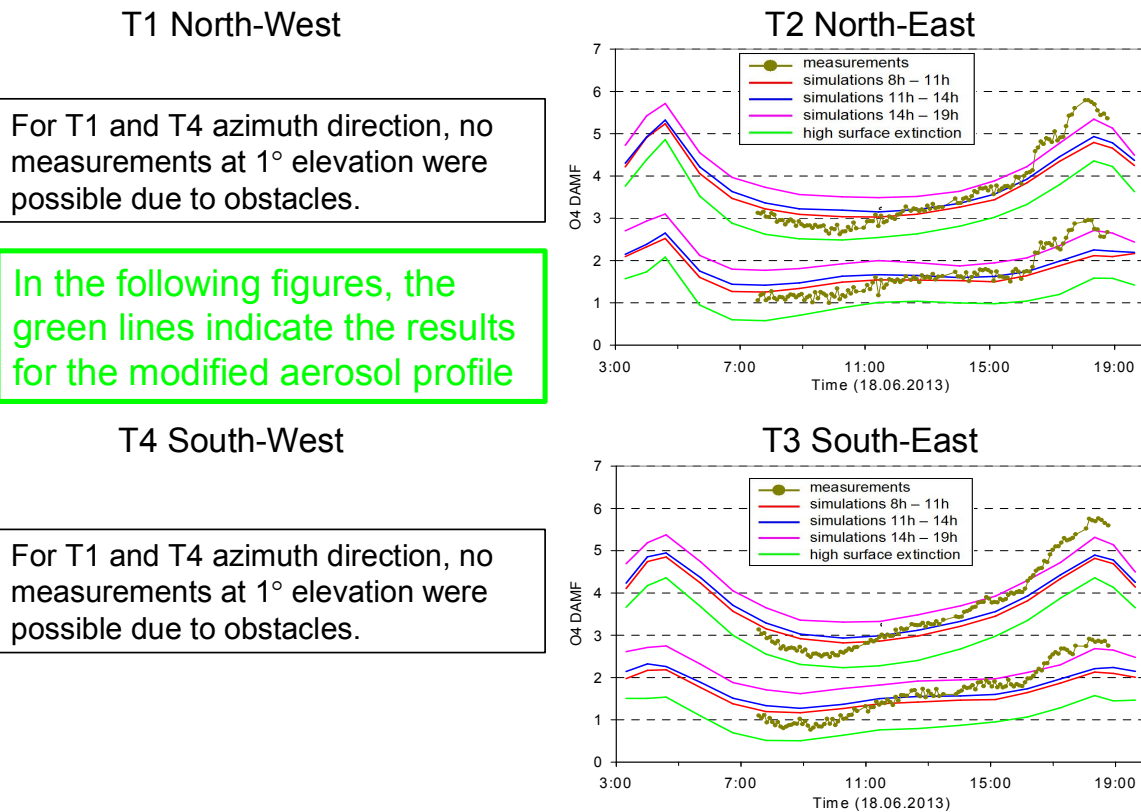

For T1 and T4 azimuth direction, no measurements at 1° elevation were possible due to obstacles.

In the following figures, the green lines indicate the results for the modified aerosol profile

For T1 and T4 azimuth direction, no measurements at 1° elevation were possible due to obstacles.

Fig. A4a Comparison results for 1° elevation angles on 18 June 2013 including the RTM results for the modified aerosol extinction profile (green line).

2022  
2023  
2024  
2025

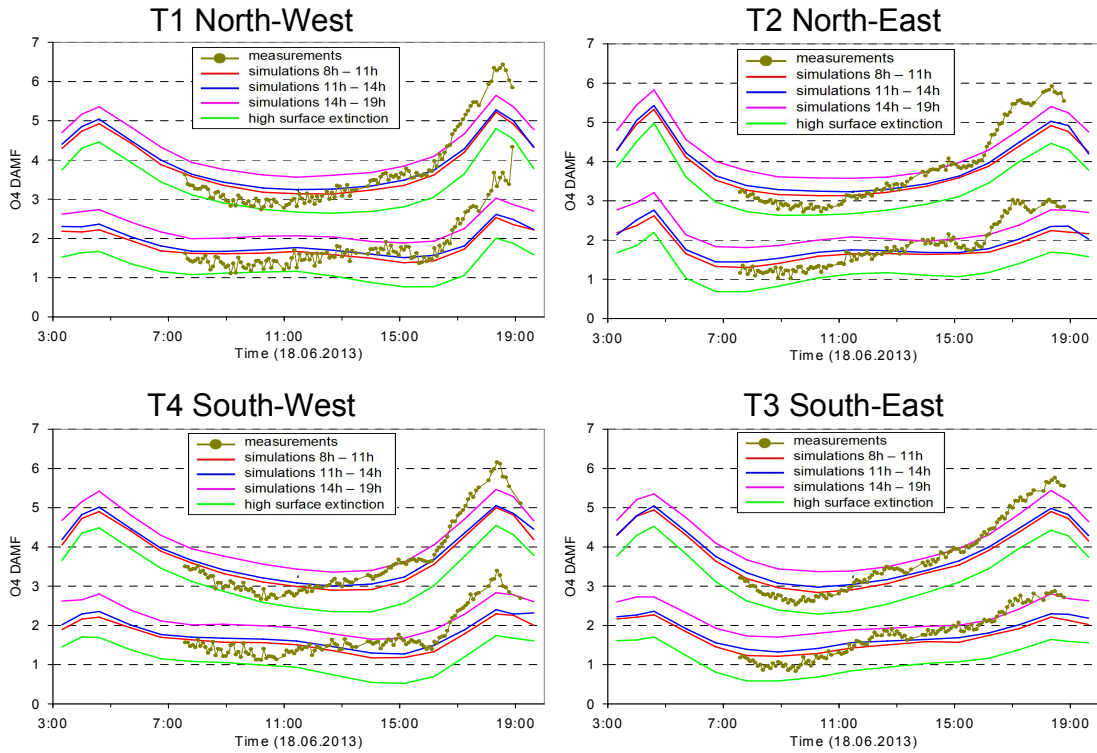

2026  
2027  
2028

Fig. A4b Comparison results for 3° elevation angles on 18 June 2013 including the RTM results for the modified aerosol extinction profile (green line)..

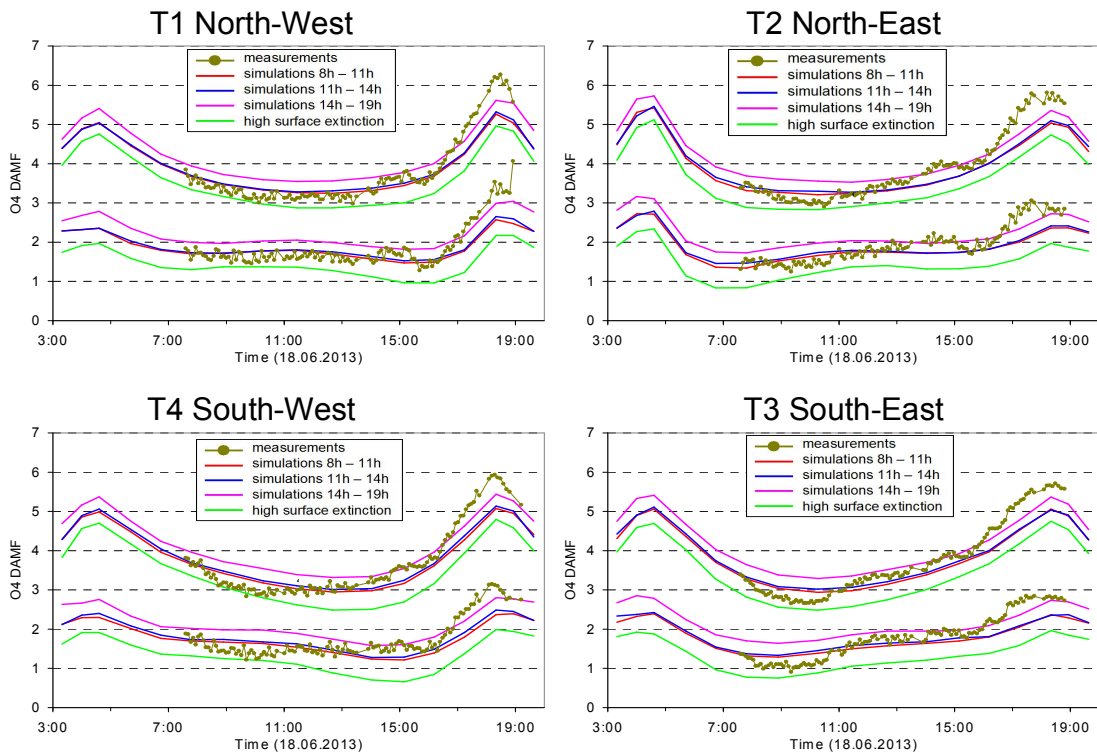

2029  
2030  
2031

Fig. A4c Comparison results for 6° elevation angles on 18 June 2013 including the RTM results for the modified aerosol extinction profile (green line).-

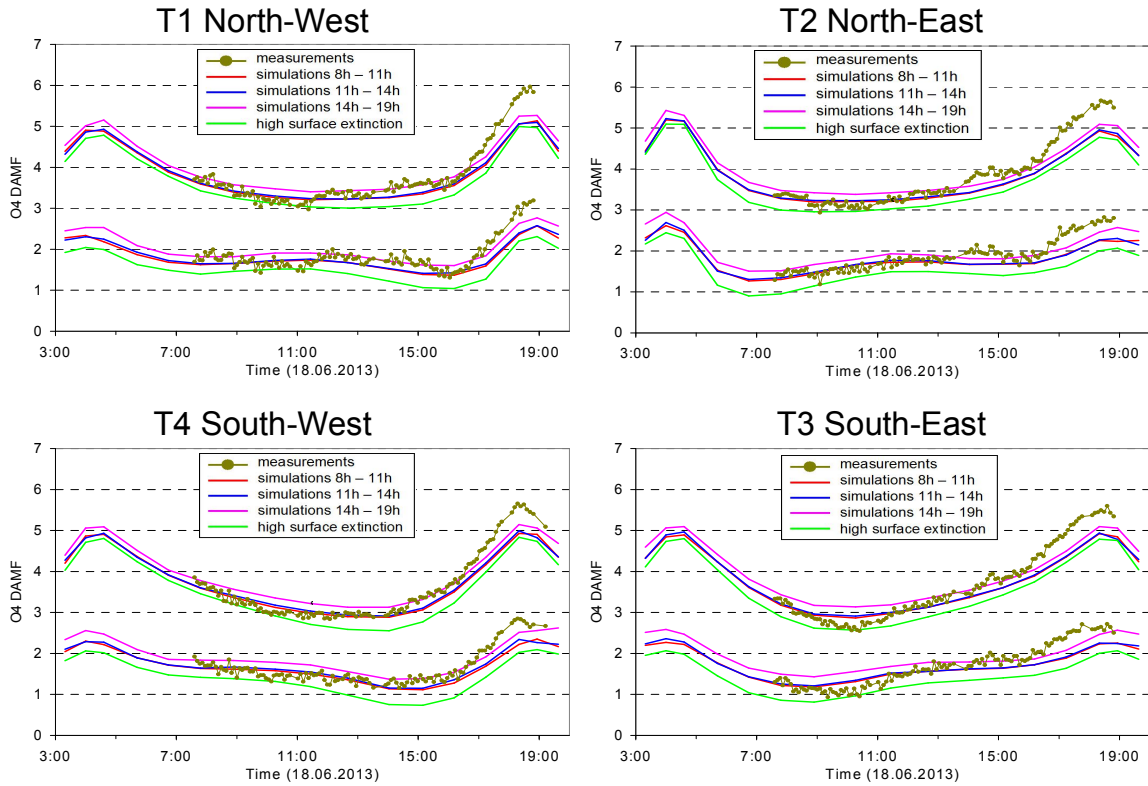

Fig. A4d Comparison results for 10° elevation angles on 18 June 2013 including the RTM results for the modified aerosol extinction profile (green line).

2032  
2033  
2034  
2035

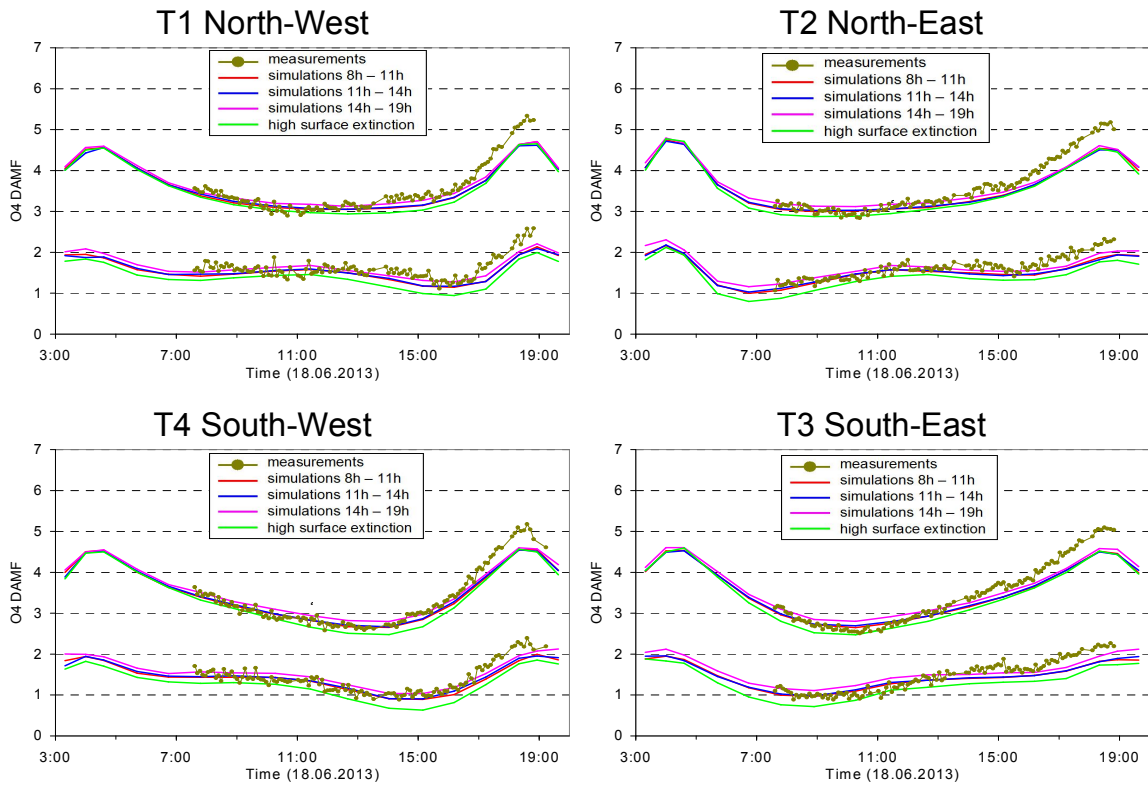

Fig. A4e Comparison results for 15° elevation angles on 18 June 2013 including the RTM results for the modified aerosol extinction profile (green line)..

2036  
2037  
2038

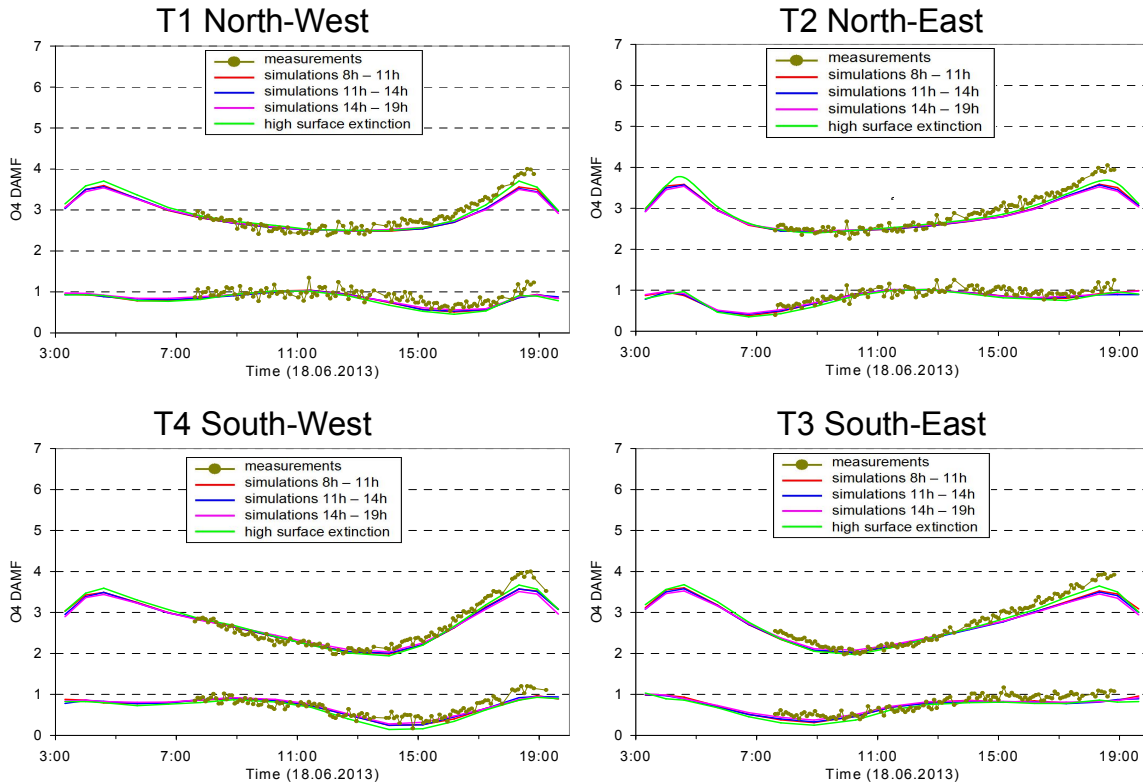

2039  
2040  
2041  
2042

Fig. A4f Comparison results for 30° elevation angles on 18 June 2013 including the RTM results for the modified aerosol extinction profile (green line)..

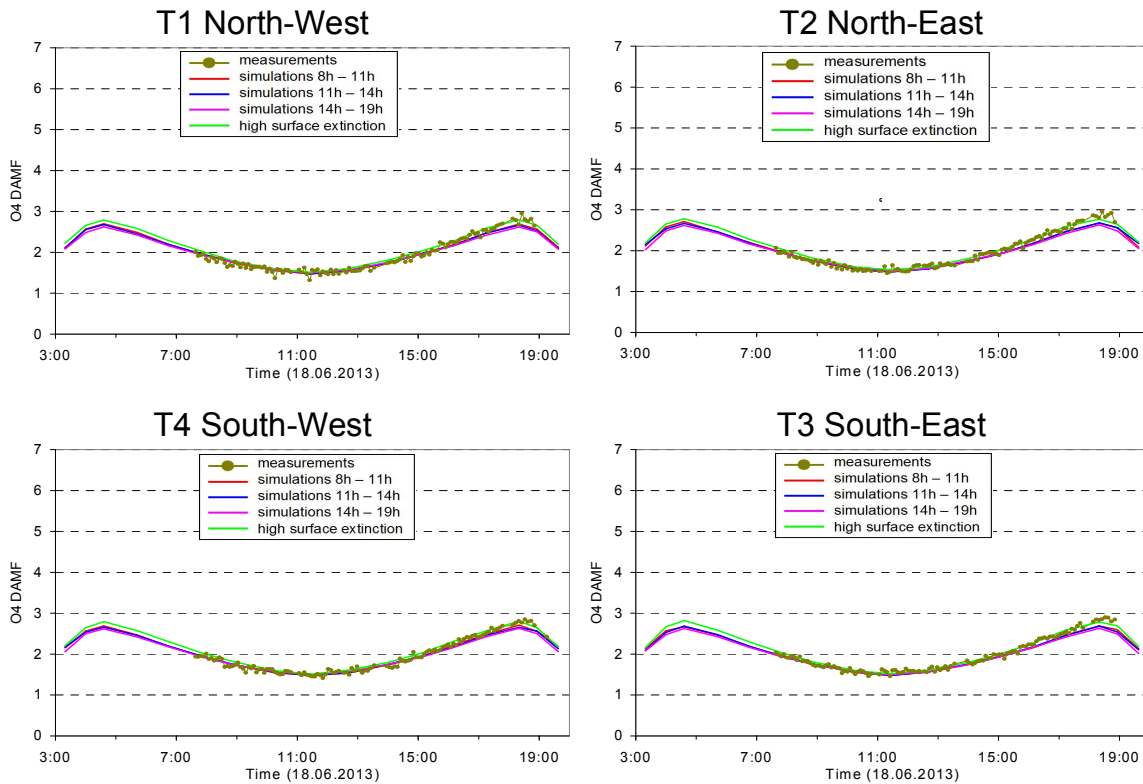

2043  
2044  
2045

Fig. A4g Comparison results (only O<sub>4</sub> AMFs) for 90° elevation angles on 18 June 2013 including the RTM results for the modified aerosol extinction profile (green line).

2046 **Appendix A3 Comparison of the different procedures to extracted height profiles of**  
2047 **temperature, pressure and O<sub>4</sub> concentration**

2048  
2049 **Extraction of temperature and pressure profiles**

2050  
2051 For the two selected days during the MAD-CAT campaign two data sets of temperature and  
2052 pressure are available: surface measurements close to the measurement site and vertical  
2053 profiles from ECMWF ERA-Interim re-analysis data (see Table 5). Both data sets are used to  
2054 derive the O<sub>4</sub> concentration profiles for the three selected periods on both days. The general  
2055 procedure is that first the temperature profiles are determined. In a second step, the pressure  
2056 profiles are derived from the temperature profiles and the measured surface pressure. For the  
2057 temperature profile extraction, three height layers are treated differently:

2058 -below 1 km

2059 Between the surface (~150 m above sea level) and 1 km, the temperature is linearly  
2060 interpolated between the average of the in situ measurements of the respective period and the  
2061 ECMWF data at 1 km (see next paragraph). This procedure is used to account for the diurnal  
2062 variation of the temperature close to the surface. Here it is important to note that for this  
2063 surface-near layer the highest accuracy is required, because a) the maximum O<sub>4</sub> concentration  
2064 is located near the surface, and b) the MAX-DOAS measurements are most sensitive close to  
2065 the surface.

2066 -1 km to 20 km

2067 In this altitude range, the diurnal variation of the temperature becomes very small. Thus the  
2068 average of the four ECMWF profiles of each day is used (for simplicity, a 6<sup>th</sup> order  
2069 polynomial is fitted to the ECMWF data).

2070 -Above 20 km

2071 In this altitude range the accuracy of the temperature profile is not critical and thus the  
2072 ECMWF temperature profile for 00:00 UTC of the respective day is used for simplicity.

2073 The temperature profiles for 8 July 2013 extracted in this way are shown in Fig. 4 (left). Close  
2074 to the surface the temperature variation during the day is about 10 K.

2075 In the next step, the pressure profiles are determined from the surface pressure (obtained from  
2076 the in situ measurements) and the extracted temperature profiles according to the ideal gas  
2077 law. In principle the effect of atmospheric humidity could also be taken into account, but the  
2078 effect is very small for surface-near layers and is thus ignored here. The derived pressure  
2079 profiles for 8 July 2013 are shown in Fig. 4 (right). Excellent agreement with the  
2080 corresponding ECMWF pressure profiles is found.

2081 Here it should be noted that in principle also the ECMWF pressure profiles could be used.  
2082 However, we chose to determine the pressure profiles from the surface pressure and the  
2083 extracted temperature profiles, because this procedure can also be applied if no ECMWF data  
2084 (or other information on temperature and pressure profiles) is available.

2085 If no profile data (e.g. from ECMWF) are available, temperature and pressure profiles can  
2086 also be extrapolated from surface measurements e.g. by assuming a constant lapse rate of  
2087 -0.65 K / 100 m for the altitude range between the surface and 12 km, and a constant  
2088 temperature above 12 km (as stated above, uncertainties at this altitude range have only a  
2089 negligible effect on the O<sub>4</sub> VCD). If no measurements or model data are available at all, a  
2090 fixed temperature and pressure profile can be used, e.g. the US standard atmosphere (United  
2091 States Committee on Extension to the Standard Atmosphere, 1976).

2092

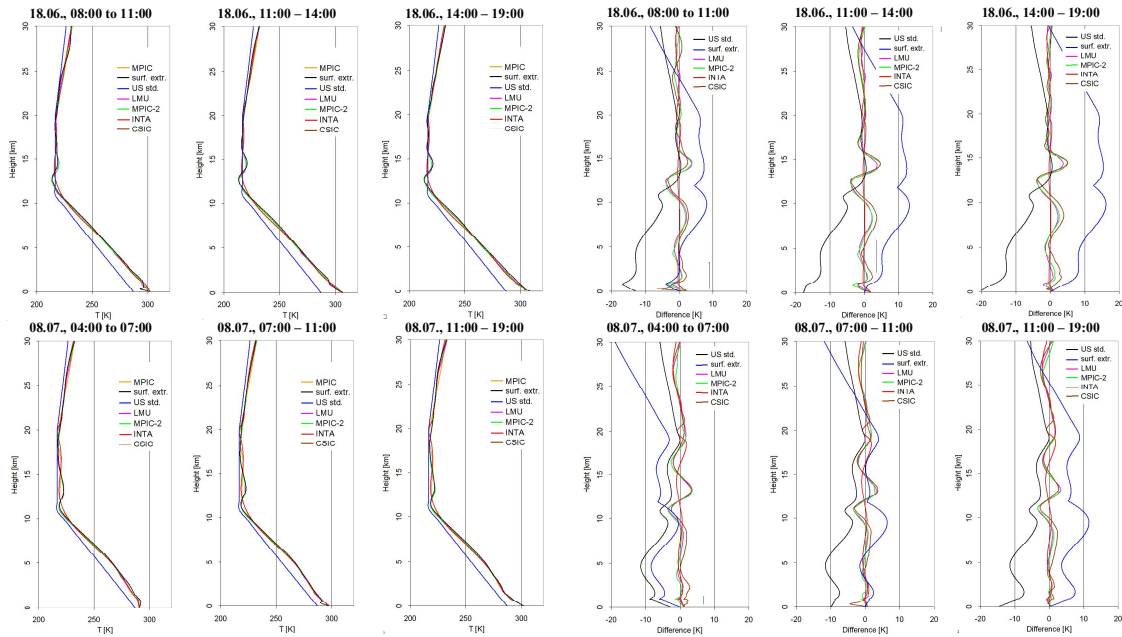

2093  
2094  
2095  
2096  
2097  
2098

Fig. A5a Left: Comparison of temperature profiles extracted by the different groups (also shown are the profiles from the US standard atmosphere and the profiles extrapolated from the surface measurements). Right: Differences of these profiles compared to the MPIC standard extraction.

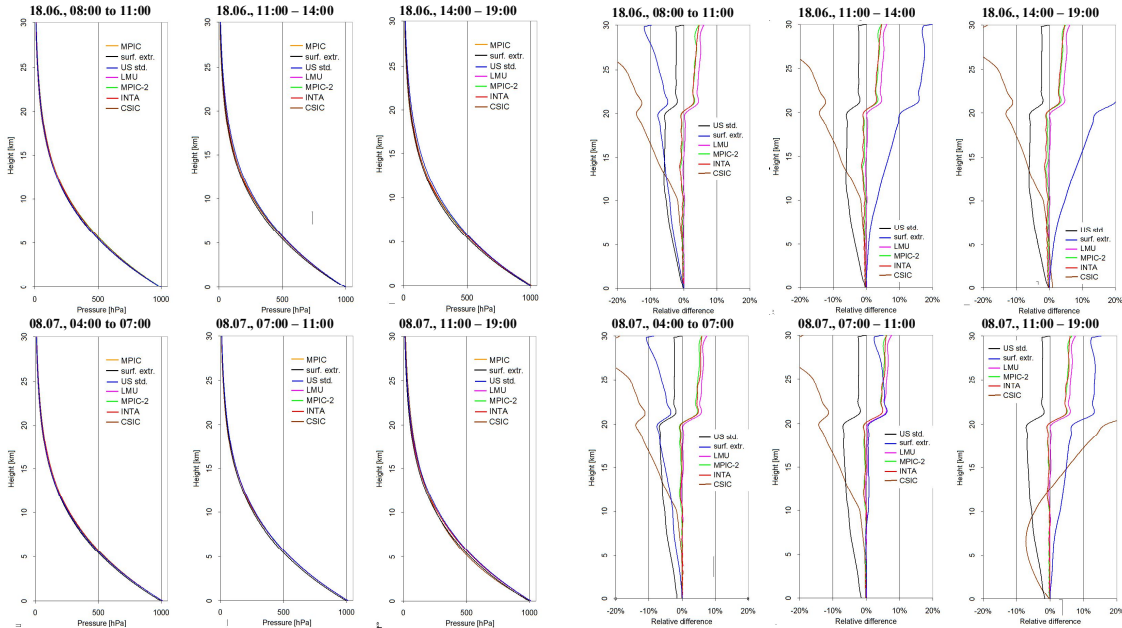

2099  
2100  
2101  
2102  
2103  
2104  
2105  
2106  
2107  
2108

Fig. A5b Left: Comparison of pressure profiles extracted by the different groups (also shown are the profiles from the US standard atmosphere and the profiles extrapolated from the surface measurements). Right: Differences of these profiles compared to the MPIC standard extraction.

2109  
 2110  
 2111  
 2112  
 2113  
 2114  
 2115  
 2116  
 2117  
 2118  
 2119  
 2120  
 2121  
 2122  
 2123  
 2124  
 2125  
 2126  
 2127  
 2128  
 2129  
 2130  
 2131  
 2132  
 2133  
 2134

**Determination of the uncertainties of the O<sub>4</sub> profiles and O<sub>4</sub> VCDs caused by uncertainties of the input parameters**

The uncertainties of the O<sub>4</sub> profiles and O<sub>4</sub> VCDs are derived by varying the input parameters according to their uncertainties. The following results are obtained:

-The variation of the temperature (whole profile) by about 2K leads to variations of the O<sub>4</sub> concentration (or O<sub>4</sub> VCD) by about 0.8%.

-The variation of the surface pressure by about 3 hPa leads to variations of the O<sub>4</sub> concentration (or O<sub>4</sub> VCD) by about 0.7%.

-The effect of uncertainties of the relative humidity depends strongly on temperature: For surface temperatures of 0°C, 10°C, 20°C, 30°C, and 35°C a variation of the relative humidity of 30% leads to variations of the O<sub>4</sub> concentration (or O<sub>4</sub> VCDs) of about 0.15%, 0.3%, 0.6%, 1.2%, and 1.6%, respectively. If the effect of atmospheric humidity is completely ignored (dry air is assumed), the resulting O<sub>4</sub> concentrations (or O<sub>4</sub> VCDs) are systematically overestimated by about 0.3%, 0.7%, 1.3%, 2.5%, and 4% for surface temperatures of 0°C, 10°C, 20°C, 30°C, and 35°C, respectively (assuming a relative humidity of 70%). In this study we used the relative humidity measured by the in situ sensors. We took these values not only for the surface layers, but also for the whole troposphere. Here it should be noted that the related uncertainties of the absolute humidity decrease quickly with altitude because the absolute humidity itself decreases quickly with altitude. Since both selected days were warm or even hot summer days, we estimate the uncertainty of the O<sub>4</sub> concentration and O<sub>4</sub> VCDs due to uncertainties of the relative humidity to 1% and 0.4% on 18 June and 8 July, respectively.

Assuming that the uncertainties of the three input parameters are independent, the total uncertainty related to these parameters is estimated to be about 1.5%.

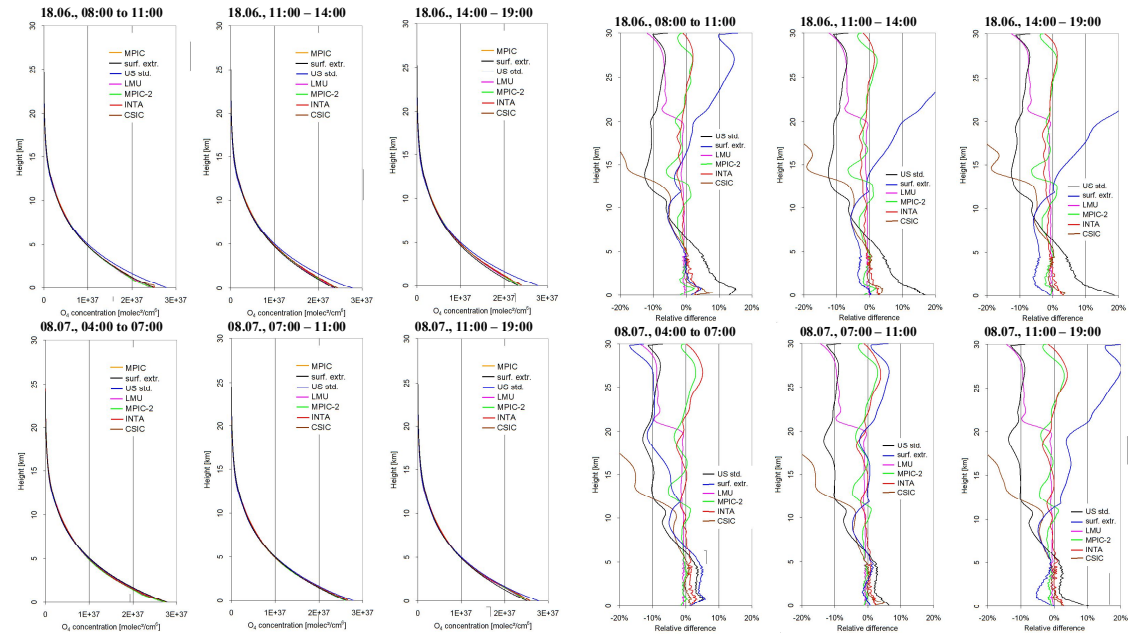

2135  
 2136  
 2137  
 2138  
 2139  
 2140  
 2141  
 2142

Fig. A5c Left: Comparison of O<sub>4</sub> concentration profiles extracted by the different groups (also shown are the profiles from the US standard atmosphere and the profiles extrapolated from the surface measurements). Right: Differences of these profiles compared to the MPIC standard extraction.



2143  
 2144  
 2145  
 2146  
 2147  
 2148  
 2149  
 2150  
 2151  
 2152  
 2153  
 2154  
 2155  
 2156  
 2157  
 2158  
 2159  
 2160  
 2161  
 2162  
 2163  
 2164  
 2165  
 2166  
 2167

**Appendix A4 Results of the sensitivity studies of simulated and measured O<sub>4</sub> (d)MFs**

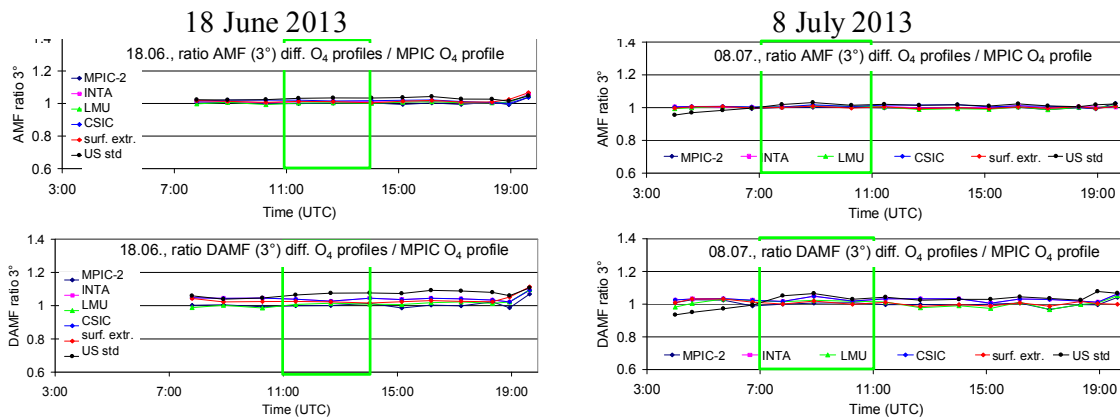

2168  
 2169  
 2170  
 2171  
 2172  
 2173  
 2174  
 2175  
 2176  
 2177  
 2178  
 2179

Fig. A6 Ratio of the O<sub>4</sub> AMFs (top) and O<sub>4</sub> dAMFs (bottom) derived for different O<sub>4</sub> profiles versus the standard O<sub>4</sub> profile (MPIC) for both selected days. Besides the O<sub>4</sub> profiles extracted by the different groups, also the O<sub>4</sub> profiles derived from the US standard atmosphere and for the extrapolation of the surface values are included.

2180 Table A4 Average ratios of O<sub>4</sub> (d)AMFs simulated for different O<sub>4</sub> profiles versus the results  
 2181 for the standard settings (using the MPIC O<sub>4</sub> profiles) for the two middle periods on both  
 2182 selected days.

| O <sub>4</sub> profile extraction | AMF ratios                  |                           | dAMF ratios                 |                           |
|-----------------------------------|-----------------------------|---------------------------|-----------------------------|---------------------------|
|                                   | 18 June 2013, 11:00 – 14:00 | 8 July 2013, 7:00 – 11:00 | 18 June 2013, 11:00 – 14:00 | 8 July 2013, 7:00 – 11:00 |
| MPIC-2                            | 1.00                        | 1.00                      | 1.00                        | 1.00                      |
| INTA                              | 1.01                        | 1.01                      | 1.02                        | 1.01                      |
| LMU                               | 1.00                        | 1.00                      | 1.01                        | 1.02                      |
| CSIC                              | 1.02                        | 1.01                      | 1.04                        | 1.02                      |
| Lapse rate                        | 1.01                        | 1.00                      | 1.02                        | 1.01                      |
| US std. atm.                      | 1.03                        | 1.02                      | 1.07                        | 1.04                      |

2183  
 2184  
 2185  
 2186  
 2187  
 2188  
 2189  
 2190  
 2191

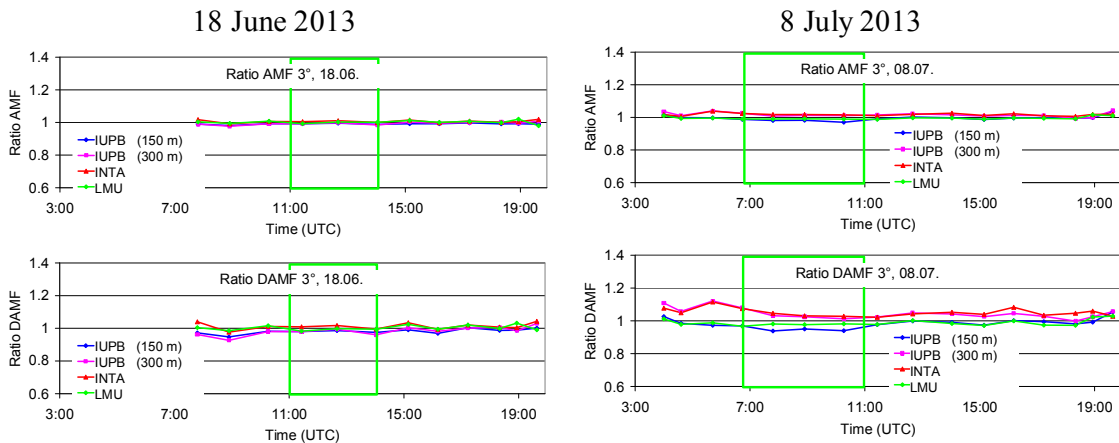

2192 Fig. A7 Ratio of the O<sub>4</sub> AMFs (top) and O<sub>4</sub> dAMFs (bottom) derived for aerosol extinction  
 2193 profiles extracted by different groups versus the standard aerosol extinction profiles (MPIC)  
 2194 for both selected days.  
 2195

2196  
 2197 Table A5 Average ratios of O<sub>4</sub> (d)AMFs simulated for different aerosol extinction profiles  
 2198 versus the results for the standard settings (using the MPIC aerosol extinction profiles) for the  
 2199 two middle periods on both selected days.

| Aerosol profile extraction | AMF ratios                  |                           | dAMF ratios                 |                           |
|----------------------------|-----------------------------|---------------------------|-----------------------------|---------------------------|
|                            | 18 June 2013, 11:00 – 14:00 | 8 July 2013, 7:00 – 11:00 | 18 June 2013, 11:00 – 14:00 | 8 July 2013, 7:00 – 11:00 |
| INTA                       | 1.01                        | 1.02                      | 1.01                        | 1.04                      |

|             |      |      |  |      |      |
|-------------|------|------|--|------|------|
| IUP-B 150 m | 0.99 | 0.98 |  | 0.98 | 0.96 |
| IUP-B 300 m | 0.99 | 1.01 |  | 0.98 | 1.03 |
| LMU         | 1.00 | 0.99 |  | 0.99 | 0.98 |

2200  
2201

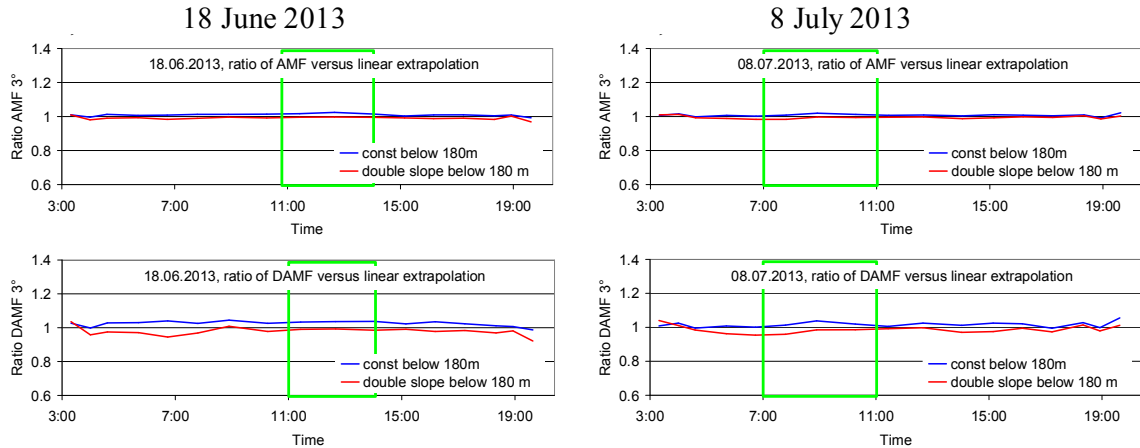

2202  
2203  
2204  
2205  
2206  
2207  
2208  
2209  
2210  
2211

Fig. A8 Ratio of the O<sub>4</sub> AMFs (top) and O<sub>4</sub> dAMFs (bottom) derived for different extrapolations of the aerosol extinction profiles below 180 m versus those for the standard settings (linearly extrapolated profiles) for both selected days.

Table A6 Average ratios of O<sub>4</sub> (d)AMFs simulated for aerosol extinction profiles with different extrapolations below 180 m versus the results for the standard settings (linear extrapolation) for the two middle periods on both selected days.

| Extrapolation below 180 m | AMF ratios                  |                           | dAMF ratios                 |                           |
|---------------------------|-----------------------------|---------------------------|-----------------------------|---------------------------|
|                           | 18 June 2013, 11:00 – 14:00 | 8 July 2013, 7:00 – 11:00 | 18 June 2013, 11:00 – 14:00 | 8 July 2013, 7:00 – 11:00 |
| Constant extinction       | 1.02                        | 1.01                      | 1.04                        | 1.02                      |
| Double slope              | 1.00                        | 0.99                      | 0.99                        | 0.98                      |

2212  
2213  
2214

18 June 2013

8 July 2013

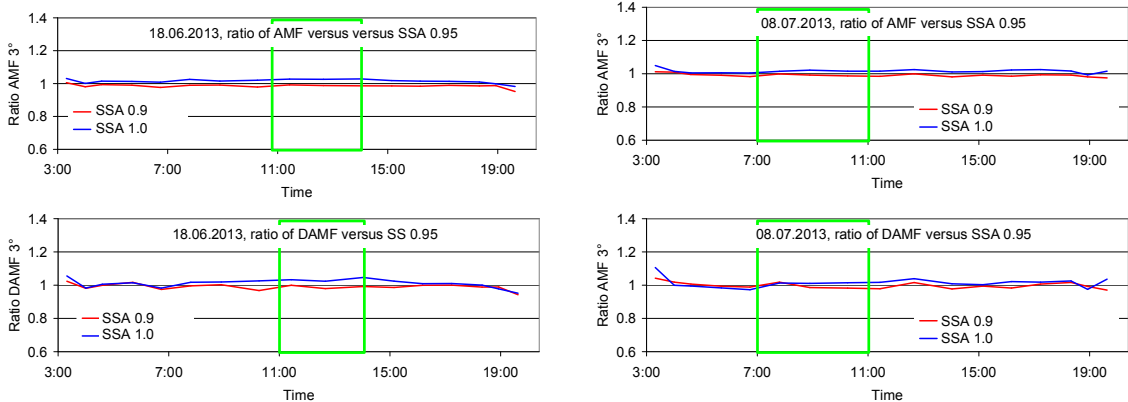

2215  
 2216  
 2217  
 2218  
 2219  
 2220  
 2221  
 2222  
 2223  
 2224  
 2225

Fig. A9 Ratio of the O<sub>4</sub> AMFs (top) and O<sub>4</sub> dAMFs (bottom) derived for different aerosol single scattering albedos versus those for the standard settings (single scattering albedo of 0.95) for both selected days.

Table A7 Average ratios of O<sub>4</sub> (d)AMFs simulated for different aerosol single scattering albedos (SSA) versus the results for the standard settings (single scattering albedo of 0.95) for the two middle periods on both selected days.

| Single scattering albedo | AMF ratios                  |                           | dAMF ratios                 |                           |
|--------------------------|-----------------------------|---------------------------|-----------------------------|---------------------------|
|                          | 18 June 2013, 11:00 – 14:00 | 8 July 2013, 7:00 – 11:00 | 18 June 2013, 11:00 – 14:00 | 8 July 2013, 7:00 – 11:00 |
| 0.9                      | 0.99                        | 0.99                      | 0.99                        | 0.99                      |
| 1.0                      | 1.03                        | 1.01                      | 1.03                        | 1.01                      |

2226  
 2227  
 2228  
 2229  
 2230  
 2231  
 2232

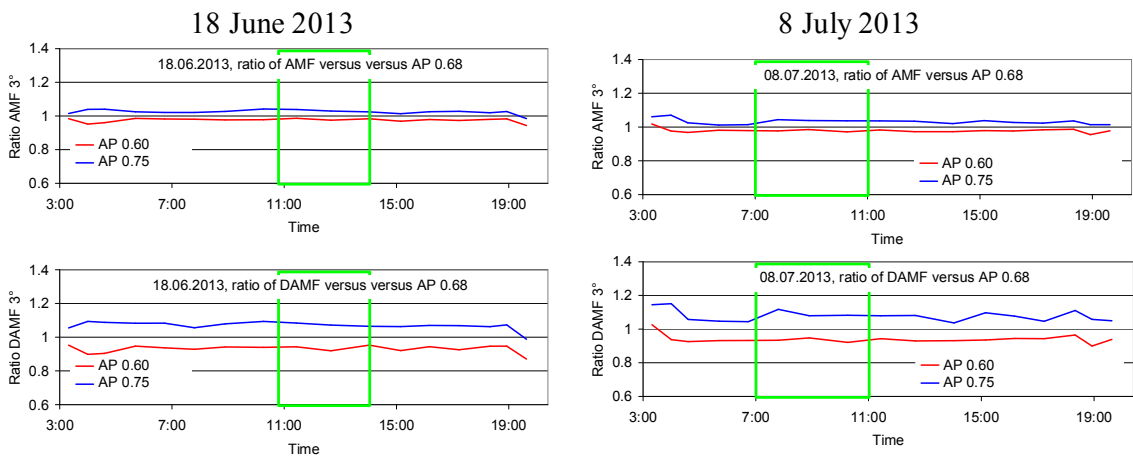

2233 Fig. A10 Ratio of the O<sub>4</sub> AMFs (top) and O<sub>4</sub> dAMFs (bottom) derived for different aerosol  
 2234 phase functions (HG-parameterisation with different asymmetry parameters) versus those for  
 2235 the standard settings (asymmetry parameter of 0.68) for both selected days.  
 2236  
 2237  
 2238  
 2239

2240 Table A8 Average ratios of O<sub>4</sub> (d)AMFs simulated for different aerosol phase functions (HG-  
 2241 parameterisation with different asymmetry parameters (AP) versus the results for the standard  
 2242 settings (asymmetry parameter of 0.68) for the two middle periods on both selected days.

|                     | AMF ratios                  |                           |  | dAMF ratios                 |                           |
|---------------------|-----------------------------|---------------------------|--|-----------------------------|---------------------------|
| Asymmetry parameter | 18 June 2013, 11:00 – 14:00 | 8 July 2013, 7:00 – 11:00 |  | 18 June 2013, 11:00 – 14:00 | 8 July 2013, 7:00 – 11:00 |
| 0.6                 | 0.98                        | 0.98                      |  | 0.94                        | 0.94                      |
| 0.75                | 1.03                        | 1.03                      |  | 1.08                        | 1.07                      |

2243  
 2244  
 2245

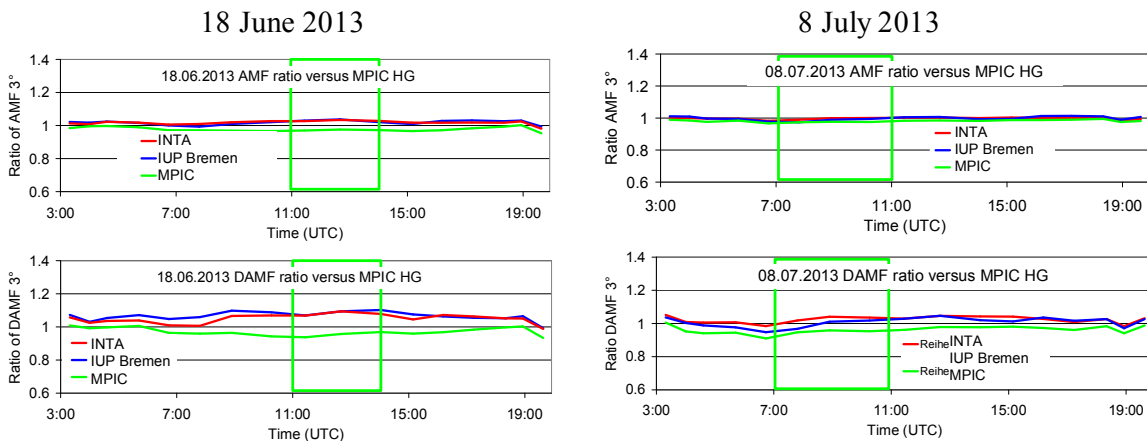

2246 Fig. A11 Ratio of the O<sub>4</sub> AMFs (top) and O<sub>4</sub> dAMFs (bottom) simulated by INTA and IUP-  
 2247 Bremen and MPIC (SCIATRAN) for phase functions derived from the sun photometer  
 2248 measurements versus those simulated by MPIC using the Henyey Greenstein phase function  
 2249 for asymmetry parameter of 0.68 for both selected days.  
 2250  
 2251

2252 Table A9 Average ratios of O<sub>4</sub> (d)AMFs simulated by INTA and IUP-Bremen and MPIC  
 2253 (SCIATRAN) for phase functions derived from the sun photometer measurements versus  
 2254 those simulated by MPIC using the Henyey Greenstein phase function for asymmetry  
 2255 parameter of 0.68 for the two middle periods on both selected days.

|                       | AMF ratios                  |                           |  | dAMF ratios                 |                           |
|-----------------------|-----------------------------|---------------------------|--|-----------------------------|---------------------------|
| Group (RTM)           | 18 June 2013, 11:00 – 14:00 | 8 July 2013, 7:00 – 11:00 |  | 18 June 2013, 11:00 – 14:00 | 8 July 2013, 7:00 – 11:00 |
| INTA (LIDORT)         | 1.03                        | 1.00                      |  | 1.09                        | 1.02                      |
| IUP-Bremen (SCIATRAN) | 1.03                        | 0.99                      |  | 1.08                        | 0.99                      |
| MPIC                  | 0.97                        | 0.98                      |  | 0.95                        | 0.95                      |

2256  
2257  
2258

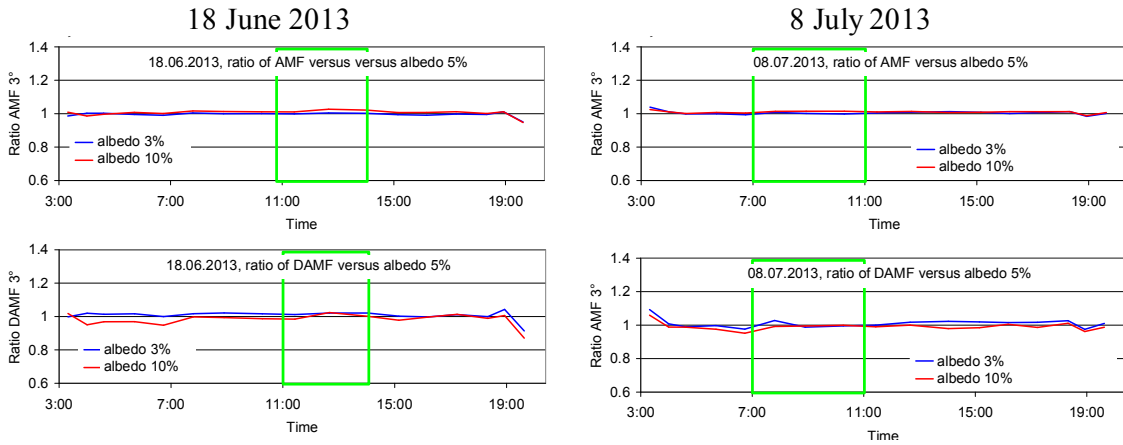

2259  
2260  
2261  
2262  
2263  
2264  
2265  
2266  
2267  
2268

Fig. A12 Ratio of the O<sub>4</sub> AMFs (top) and O<sub>4</sub> dAMFs (bottom) for different surface albedos versus those for an albedo of 5 % for both selected days.

Table A12-A10 Average ratios of O<sub>4</sub> (d)AMFs for different surface albedos versus those for an albedo of 5 % for the two middle periods on both selected days.

| Surface albedo | AMF ratios                  |                           | dAMF ratios                 |                           |
|----------------|-----------------------------|---------------------------|-----------------------------|---------------------------|
|                | 18 June 2013, 11:00 – 14:00 | 8 July 2013, 7:00 – 11:00 | 18 June 2013, 11:00 – 14:00 | 8 July 2013, 7:00 – 11:00 |
| 3 %            | 1.00                        | 1.00                      | 1.02                        | 1.00                      |
| 10 %           | 1.02                        | 1.01                      | 1.00                        | 0.99                      |

2269  
2270  
2271  
2272  
2273  
2274  
2275

18 June 2013

8 July 2013

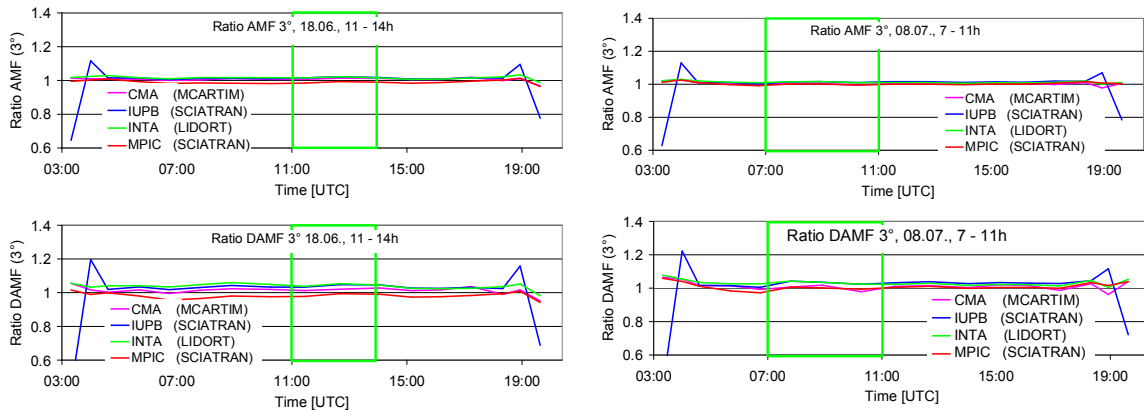

2276  
2277  
2278  
2279  
2280  
2281  
2282  
2283  
2284  
2285  
2286

Fig. A13 Ratio of the O<sub>4</sub> AMFs (top) and O<sub>4</sub> dAMFs (bottom) simulated by different groups using different radiative transfer models versus those for the MPIC simulations using MCARTIM for both selected days.

Table A11 Average ratios of O<sub>4</sub> (d)AMFs simulated by different groups using different radiative transfer models versus those for the MPIC simulations using MCARTIM for the two middle periods on both selected days.

| Group (RTM)           | AMF ratios                  |                           | dAMF ratios                 |                           |
|-----------------------|-----------------------------|---------------------------|-----------------------------|---------------------------|
|                       | 18 June 2013, 11:00 – 14:00 | 8 July 2013, 7:00 – 11:00 | 18 June 2013, 11:00 – 14:00 | 8 July 2013, 7:00 – 11:00 |
| CMA (MCARTIM)         | 1.01                        | 1.00                      | 1.02                        | 1.00                      |
| IUP-Bremen (SCIATRAN) | 1.02                        | 1.01                      | 1.04                        | 1.03                      |
| INTA (LIDORT)         | 1.02                        | 1.01                      | 1.05                        | 1.03                      |
| MPIC (SCIATRAN)       | 0.99                        | 1.00                      | 0.99                        | 1.00                      |

2287  
2288  
2289  
2290  
2291  
2292  
2293  
2294  
2295  
2296  
2297  
2298  
2299  
2300  
2301

18 June 2013

8 July 2013

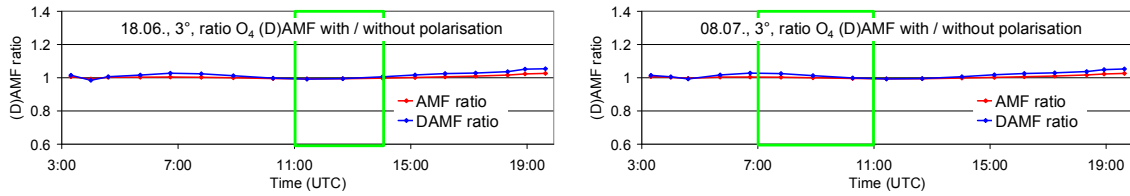

2302  
2303  
2304  
2305  
2306  
2307  
2308  
2309

Fig. A14 Ratio of the O<sub>4</sub> (d)AMFs considering polarisation versus those without considering polarisation for both selected days.

Table A12 Average ratios of O<sub>4</sub> (d)AMFs considering polarisation versus those without considering polarisation for the two middle periods on both selected days.

|                          | AMF ratios                     |                              |  | dAMF ratios                    |                              |
|--------------------------|--------------------------------|------------------------------|--|--------------------------------|------------------------------|
|                          | 18 June 2013,<br>11:00 – 14:00 | 8 July 2013,<br>7:00 – 11:00 |  | 18 June 2013,<br>11:00 – 14:00 | 8 July 2013,<br>7:00 – 11:00 |
| Considering polarisation | 1.00                           | 1.00                         |  | 1.00                           | 1.01                         |

2310  
2311  
2312  
2313  
2314  
2315  
2316  
2317  
2318

Table A13 Average ratios of O<sub>4</sub> (d)AMFs derived from synthetic spectra versus those obtained from radiative transfer simulations at 360 nm for the two middle periods on both selected days.

|                                 | AMF ratios                     |                              |  | dAMF ratios                    |                              |
|---------------------------------|--------------------------------|------------------------------|--|--------------------------------|------------------------------|
| Temperature dependence / noise  | 18 June 2013,<br>11:00 – 14:00 | 8 July 2013,<br>7:00 – 11:00 |  | 18 June 2013,<br>11:00 – 14:00 | 8 July 2013,<br>7:00 – 11:00 |
| T dep. considered / no noise    | 1.01                           | 1.02                         |  | 1.01                           | 1.00                         |
| no T dep. considered / no noise | 1.00                           | 1.01                         |  | 1.00                           | 1.00                         |
| no T dep. considered / noise    | 0.99                           | 1.00                         |  | 1.00                           | 1.01                         |

2319  
2320  
2321  
2322  
2323  
2324  
2325  
2326

18 June 2013

8 July 2013



2327

a) measured spectra

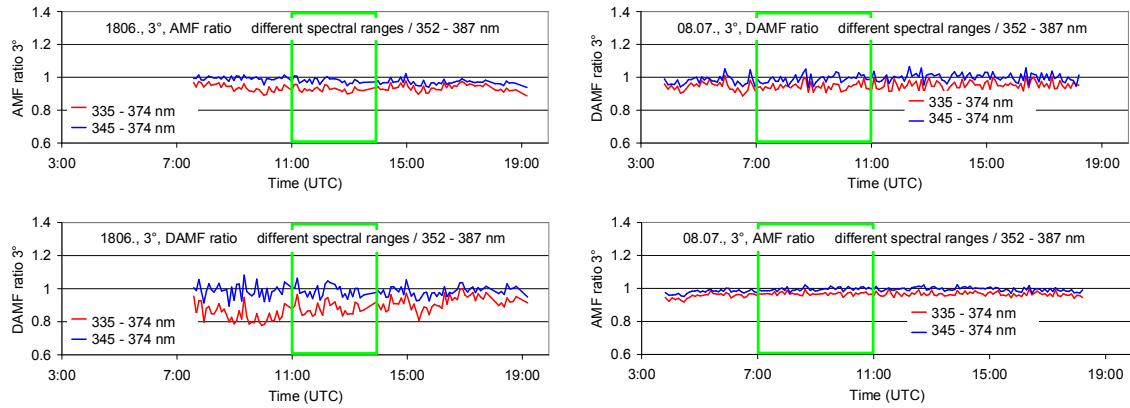

2328  
2329

b) synthetic spectra

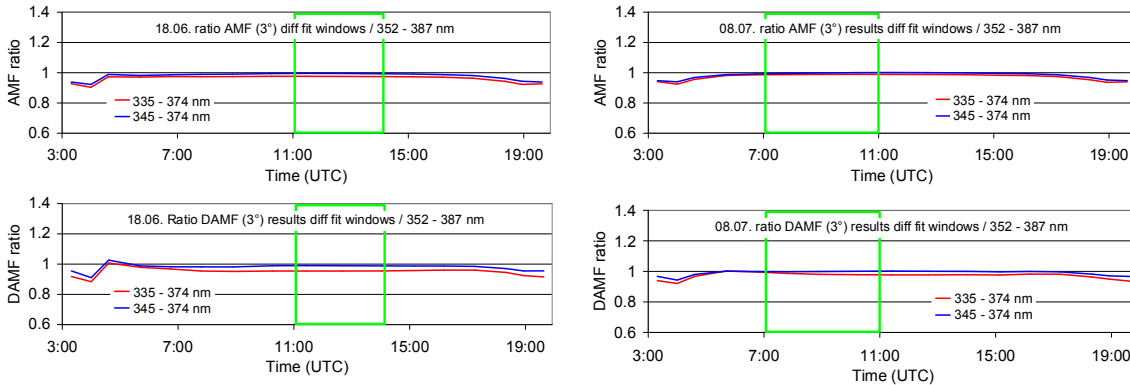

2330

2331

2332

2333

2334

2335

2336

2337

2338

2339

2340

Fig. A15 Ratio of the O<sub>4</sub> (d)AMFs derived for different fit windows versus those for the standard fit window (352 – 387 nm) for both selected days (top: results for spectra measured by the MPIC instrument; bottom: results for synthetic spectra taking into account the temperature dependence of the O<sub>4</sub> cross section).

Table A14 Average ratios of O<sub>4</sub> (d)AMFs derived for different fit windows versus those for the standard fit window (352 – 387 nm) for the two middle periods on both selected days (top: results for spectra measured by the MPIC instrument; bottom: results for synthetic spectra taking into account the temperature dependence of the O<sub>4</sub> cross section).

|                          | AMF ratios                  |                           |  | dAMF ratios                 |                           |
|--------------------------|-----------------------------|---------------------------|--|-----------------------------|---------------------------|
| Spectral range           | 18 June 2013, 11:00 – 14:00 | 8 July 2013, 7:00 – 11:00 |  | 18 June 2013, 11:00 – 14:00 | 8 July 2013, 7:00 – 11:00 |
| <b>Measured Spectra</b>  |                             |                           |  |                             |                           |
| 335 – 374 nm             | 0.93                        | 0.97                      |  | 0.88                        | 0.94                      |
| 345 – 374 nm             | 0.98                        | 1.00                      |  | 0.99                        | 0.99                      |
| <b>Synthetic Spectra</b> |                             |                           |  |                             |                           |
| 335 – 374 nm             | 0.98                        | 0.99                      |  | 0.95                        | 0.98                      |
| 345 – 374 nm             | 0.99                        | 1.00                      |  | 0.99                        | 1.00                      |

2341

18 June 2013

8 July 2013

2342 a) measured spectra

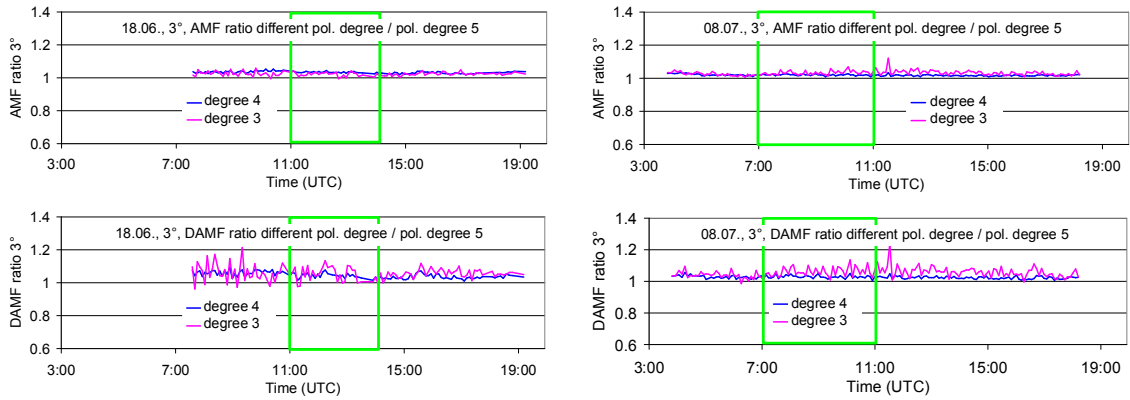

2343  
2344

b) synthetic spectra

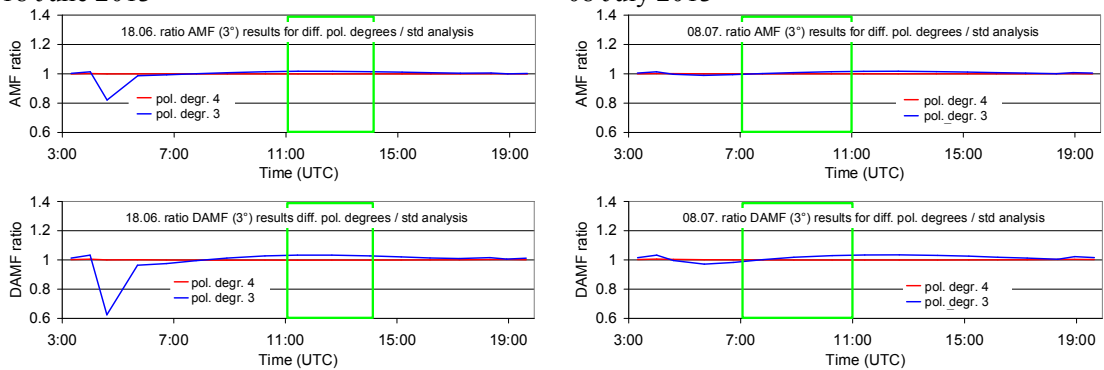

2345  
2346  
2347  
2348  
2349  
2350  
2351  
2352

Fig. A16 Ratio of the O<sub>4</sub> (d)AMFs derived for different polynomials versus those for the standard analysis (polynomial degree 5) for both selected days (top: results for spectra measured by the MPIC instrument; bottom: results for synthetic spectra taking into account the temperature dependence of the O<sub>4</sub> cross section).

2353  
2354  
2355  
2356

Table A15 Average ratios of O<sub>4</sub> (d)AMFs derived for different polynomials versus those for the standard analysis (polynomial degree 5) for the two middle periods on both selected days (top: results for spectra measured by the MPIC instrument; bottom: results for synthetic spectra taking into account the temperature dependence of the O<sub>4</sub> cross section).

| Degree of polynomial     | AMF ratios                  |                           |  | dAMF ratios                 |                           |
|--------------------------|-----------------------------|---------------------------|--|-----------------------------|---------------------------|
|                          | 18 June 2013, 11:00 – 14:00 | 8 July 2013, 7:00 – 11:00 |  | 18 June 2013, 11:00 – 14:00 | 8 July 2013, 7:00 – 11:00 |
| <b>Measured Spectra</b>  |                             |                           |  |                             |                           |
| 4                        | 1.04                        | 1.02                      |  | 1.06                        | 1.03                      |
| 3                        | 1.03                        | 1.03                      |  | 1.06                        | 1.06                      |
| <b>Synthetic Spectra</b> |                             |                           |  |                             |                           |
| 4                        | 1.00                        | 1.00                      |  | 1.00                        | 1.00                      |
| 3                        | 1.02                        | 1.01                      |  | 1.03                        | 1.01                      |

2357

18 June 2013

8 July 2013

2358 a) measured spectra

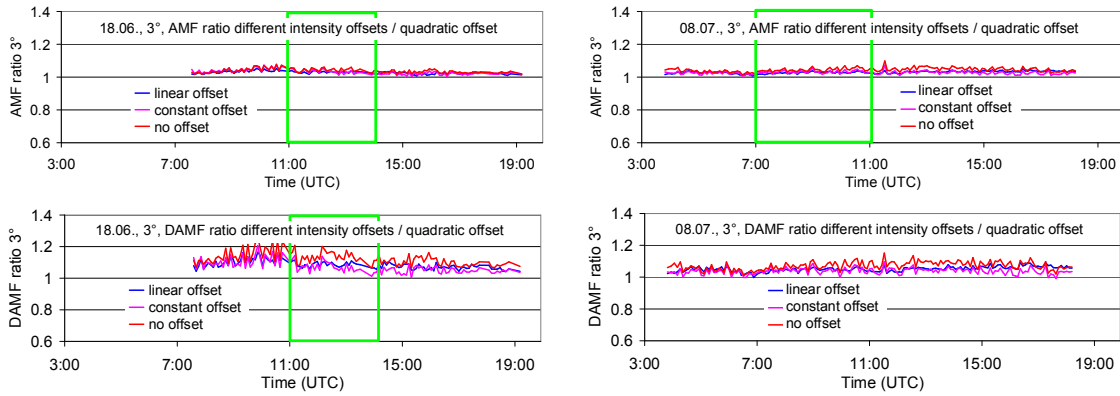

2359  
2360

b) synthetic spectra

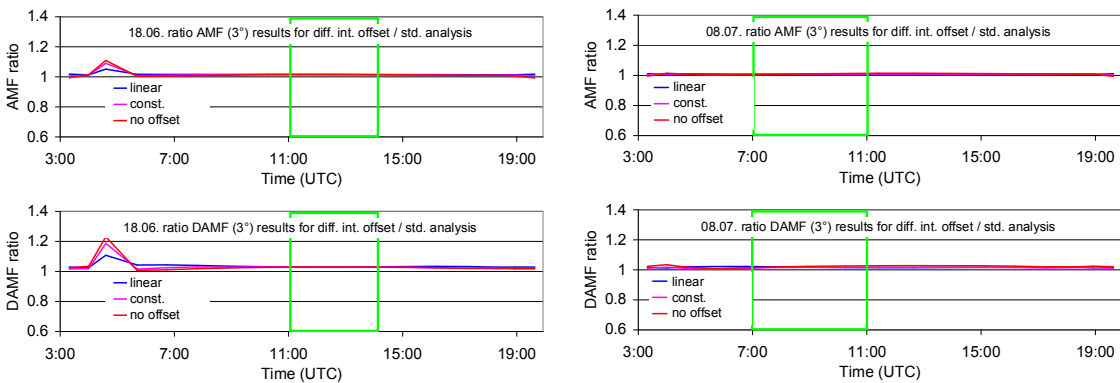

2361  
2362  
2363  
2364  
2365  
2366  
2367  
2368  
2369  
2370  
2371  
2372  
2373  
2374  
2375  
2376  
2377  
2378  
2379  
2380  
2381  
2382  
2383  
2384  
2385  
2386  
2387

Fig. A17 Ratio of the  $O_4$  (d)AMFs derived for different intensity offsets versus those for the standard analysis (intensity offset of degree 2) for both selected days (top: results for spectra measured by the MPIC instrument; bottom: results for synthetic spectra taking into account the temperature dependence of the  $O_4$  cross section).

Table A16 Average ratios of  $O_4$  (d)AMFs derived for different intensity offsets versus those for the standard analysis (intensity offset of degree 2) for the two middle periods on both

2388 selected days (top: results for spectra measured by the MPIC instrument; bottom: results for  
 2389 synthetic spectra taking into account the temperature dependence of the O<sub>4</sub> cross section).

|                          | AMF ratios                     |                              |  | dAMF ratios                    |                              |
|--------------------------|--------------------------------|------------------------------|--|--------------------------------|------------------------------|
| Intensity offset         | 18 June 2013,<br>11:00 – 14:00 | 8 July 2013,<br>7:00 – 11:00 |  | 18 June 2013,<br>11:00 – 14:00 | 8 July 2013,<br>7:00 – 11:00 |
| <b>Measured Spectra</b>  |                                |                              |  |                                |                              |
| Linear                   | 1.04                           | 1.03                         |  | 1.11                           | 1.05                         |
| Constant                 | 1.05                           | 1.03                         |  | 1.11                           | 1.04                         |
| No offset                | 1.05                           | 1.05                         |  | 1.16                           | 1.07                         |
| <b>Synthetic Spectra</b> |                                |                              |  |                                |                              |
| Linear                   | 1.01                           | 1.01                         |  | 1.03                           | 1.02                         |
| Constant                 | 1.02                           | 1.01                         |  | 1.03                           | 1.02                         |
| No offset                | 1.02                           | 1.01                         |  | 1.03                           | 1.02                         |

2390  
 2391  
 2392  
 2393

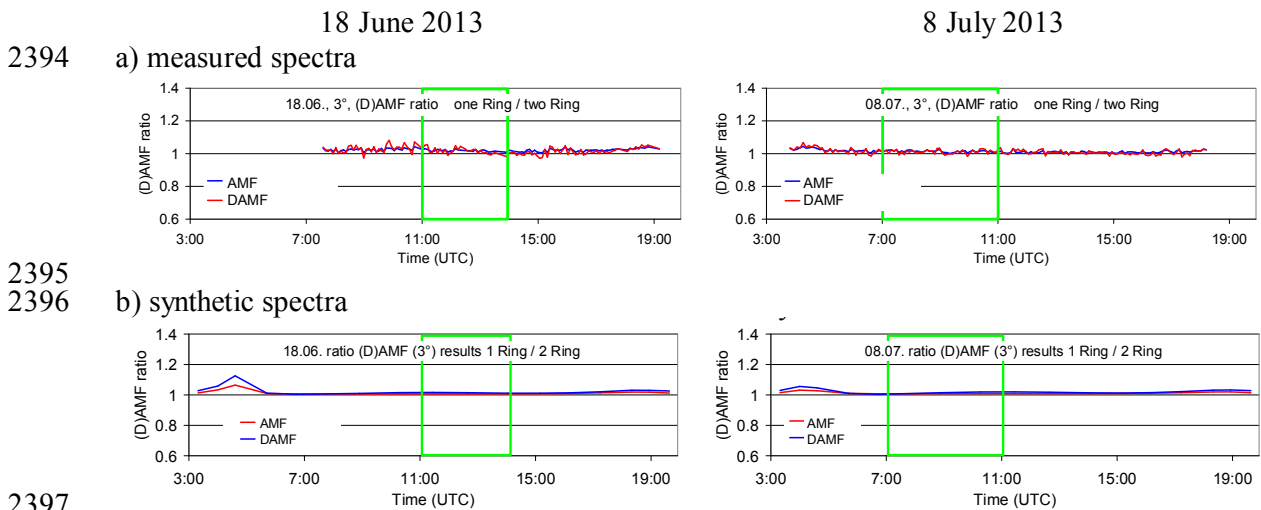

2397  
 2398 Fig. A18 Ratio of the O<sub>4</sub> (d)AMFs derived for the analysis with only one Ring spectrum  
 2399 versus those for the standard analysis (using two Ring spectra) for both selected days (top:  
 2400 results for spectra measured by the MPIC instrument; bottom: results for synthetic spectra  
 2401 taking into account the temperature dependence of the O<sub>4</sub> cross section).  
 2402  
 2403  
 2404  
 2405  
 2406  
 2407  
 2408

2409 Table A17 Average ratios of O<sub>4</sub> (d)AMFs derived for the analysis with only one Ring  
 2410 spectrum versus those for the standard analysis (using two Ring spectra) for the two middle  
 2411 periods on both selected days (top: results for spectra measured by the MPIC instrument;

2412 bottom: results for synthetic spectra taking into account the temperature dependence of the O<sub>4</sub>  
 2413 cross section).

|                          | AMF ratios                     |                              |  | dAMF ratios                    |                              |
|--------------------------|--------------------------------|------------------------------|--|--------------------------------|------------------------------|
| Ring correction          | 18 June 2013,<br>11:00 – 14:00 | 8 July 2013,<br>7:00 – 11:00 |  | 18 June 2013,<br>11:00 – 14:00 | 8 July 2013,<br>7:00 – 11:00 |
| <b>Measured Spectra</b>  |                                |                              |  |                                |                              |
| Only one Ring spectrum   | 1.02                           | 0.99                         |  | 1.01                           | 0.99                         |
| <b>Synthetic Spectra</b> |                                |                              |  |                                |                              |
| Only one Ring spectrum   | 1.01                           | 1.01                         |  | 1.01                           | 1.01                         |

2414  
 2415  
 2416  
 2417

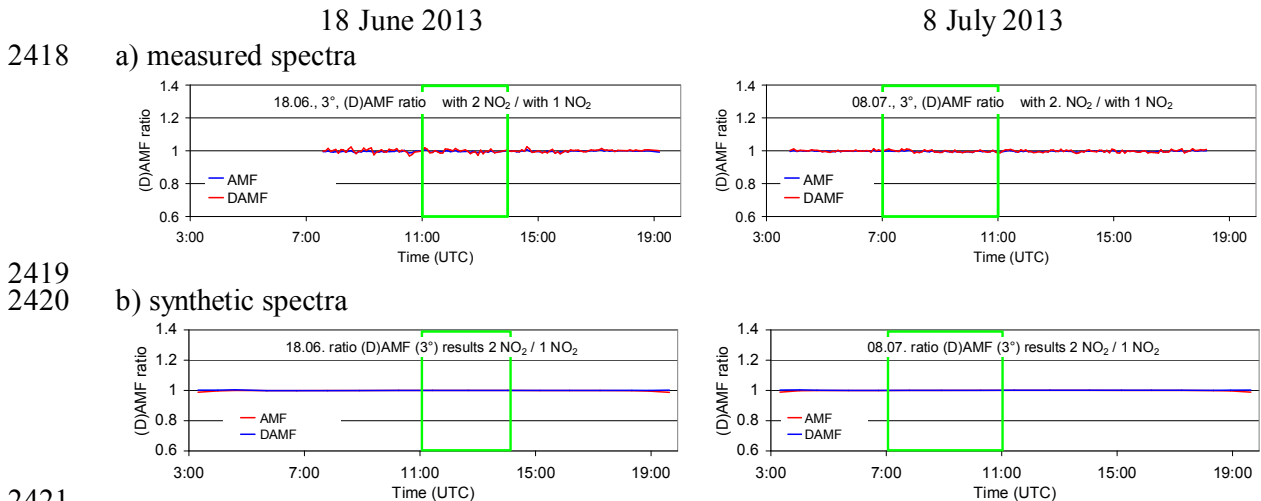

2421  
 2422 Fig. A19 Ratio of the O<sub>4</sub> (d)AMFs derived for the analysis with a second NO<sub>2</sub> cross section  
 2423 (for 220 K) versus those for the standard analysis (only NO<sub>2</sub> cross section for 294 K) for both  
 2424 selected days (top: results for spectra measured by the MPIC instrument; bottom: results for  
 2425 synthetic spectra taking into account the temperature dependence of the O<sub>4</sub> cross section).  
 2426  
 2427  
 2428  
 2429  
 2430  
 2431  
 2432  
 2433  
 2434  
 2435  
 2436  
 2437  
 2438

2439 Table A18 Average ratios of O<sub>4</sub> (d)AMFs derived for the analysis with a second NO<sub>2</sub> cross  
 2440 section (for 220 K) versus those for the standard analysis (only NO<sub>2</sub> cross section for 294 K)  
 2441 for the two middle periods on both selected days (top: results for spectra measured by the  
 2442 MPIC instrument; bottom: results for synthetic spectra taking into account the temperature  
 2443 dependence of the O<sub>4</sub> cross section).

|                                | AMF ratios                  |                           |  | dAMF ratios                 |                           |
|--------------------------------|-----------------------------|---------------------------|--|-----------------------------|---------------------------|
| NO <sub>2</sub> cross sections | 18 June 2013, 11:00 – 14:00 | 8 July 2013, 7:00 – 11:00 |  | 18 June 2013, 11:00 – 14:00 | 8 July 2013, 7:00 – 11:00 |
| <b>Measured Spectra</b>        |                             |                           |  |                             |                           |
| 294 & 220 K                    | 1.00                        | 1.00                      |  | 1.00                        | 1.00                      |
| <b>Synthetic Spectra</b>       |                             |                           |  |                             |                           |
| 294 & 220 K                    | 1.00                        | 1.00                      |  | 1.00                        | 1.00                      |

2444  
 2445  
 2446  
 2447

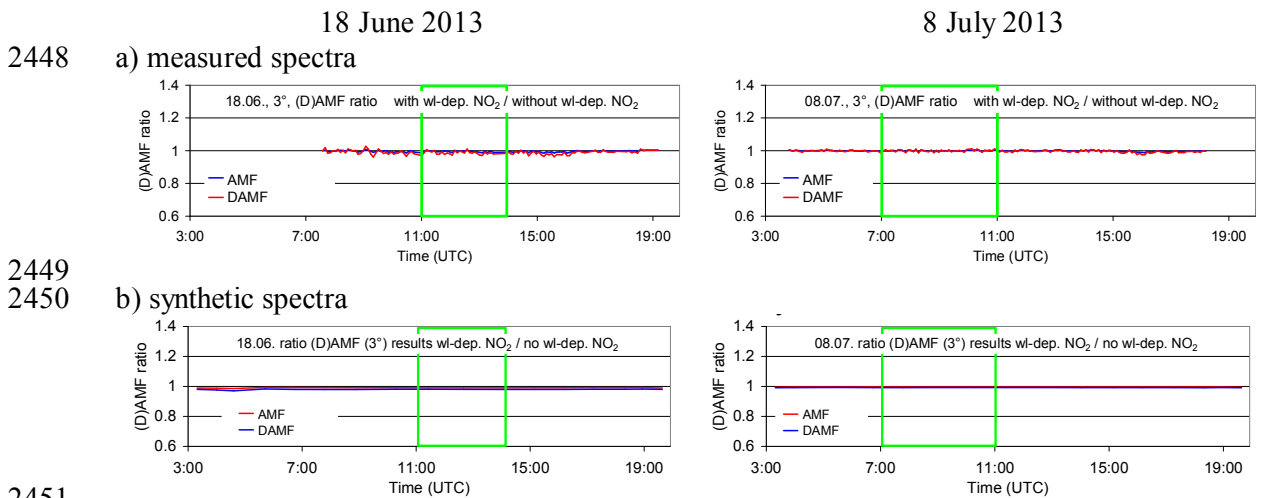

2451  
 2452 Fig. A20 Ratio of the O<sub>4</sub> (d)AMFs derived for the analysis with a second NO<sub>2</sub> cross  
 2453 section (cross section times wavelength) versus those for the standard analysis (only one NO<sub>2</sub> cross  
 2454 section) for both selected days (top: results for spectra measured by the MPIC instrument;  
 2455 bottom: results for synthetic spectra taking into account the temperature dependence of the O<sub>4</sub>  
 2456 cross section).  
 2457  
 2458  
 2459  
 2460  
 2461  
 2462  
 2463  
 2464  
 2465  
 2466  
 2467

2468 Table A19 Average ratios of O<sub>4</sub> (d)AMFs derived for the analysis with a second NO<sub>2</sub> cross  
 2469 section (cross section times wavelength) versus those for the standard analysis (only one NO<sub>2</sub>  
 2470 cross section) for the two middle periods on both selected days (top: results for spectra  
 2471 measured by the MPIC instrument; bottom: results for synthetic spectra taking into account  
 2472 the temperature dependence of the O<sub>4</sub> cross section).

|                                            | AMF ratios                  |                           |  | dAMF ratios                 |                           |
|--------------------------------------------|-----------------------------|---------------------------|--|-----------------------------|---------------------------|
| NO <sub>2</sub> wavelength dependence      | 18 June 2013, 11:00 – 14:00 | 8 July 2013, 7:00 – 11:00 |  | 18 June 2013, 11:00 – 14:00 | 8 July 2013, 7:00 – 11:00 |
| <b>Measured Spectra</b>                    |                             |                           |  |                             |                           |
| additional cross for wavelength dependence | 1.00                        | 1.00                      |  | 0.99                        | 1.00                      |
| <b>Synthetic Spectra</b>                   |                             |                           |  |                             |                           |
| additional cross for wavelength dependence | 0.99                        | 1.00                      |  | 0.98                        | 0.99                      |

2473  
 2474  
 2475  
 2476

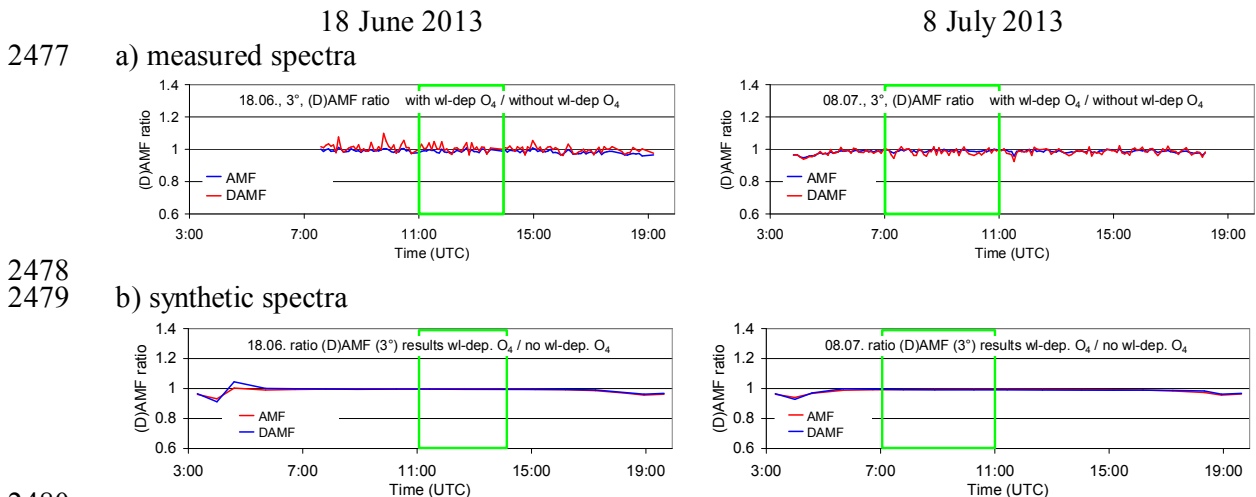

2480  
 2481 Fig. A21 Ratio of the O<sub>4</sub> (d)AMFs derived for the analysis with a second O<sub>4</sub> cross  
 2482 section (accounting for the wavelength dependence) versus those for the standard analysis (only one  
 2483 O<sub>4</sub> cross section) for both selected days (top: results for spectra measured by the MPIC  
 2484 instrument; bottom: results for synthetic spectra taking into account the temperature  
 2485 dependence of the O<sub>4</sub> cross section).  
 2486  
 2487  
 2488  
 2489  
 2490  
 2491  
 2492

2493  
 2494  
 2495  
 2496  
 2497  
 2498

Table A20 Average ratios of O<sub>4</sub> (d)AMFs derived for the analysis with a second O<sub>4</sub> cross section (accounting for the wavelength dependence) versus those for the standard analysis (only one O<sub>4</sub> cross section) for the two middle periods on both selected days (top: results for spectra measured by the MPIC instrument; bottom: results for synthetic spectra taking into account the temperature dependence of the O<sub>4</sub> cross section).

|                                            | AMF ratios                  |                           |  | dAMF ratios                 |                           |
|--------------------------------------------|-----------------------------|---------------------------|--|-----------------------------|---------------------------|
| O <sub>4</sub> wavelength dependence       | 18 June 2013, 11:00 – 14:00 | 8 July 2013, 7:00 – 11:00 |  | 18 June 2013, 11:00 – 14:00 | 8 July 2013, 7:00 – 11:00 |
| <b>Measured Spectra</b>                    |                             |                           |  |                             |                           |
| additional cross for wavelength dependence | 0.99                        | 0.99                      |  | 1.01                        | 0.99                      |
| <b>Synthetic Spectra</b>                   |                             |                           |  |                             |                           |
| additional cross for wavelength dependence | 1.00                        | 0.99                      |  | 1.00                        | 0.99                      |

2499  
 2500  
 2501  
 2502  
 2503

2504

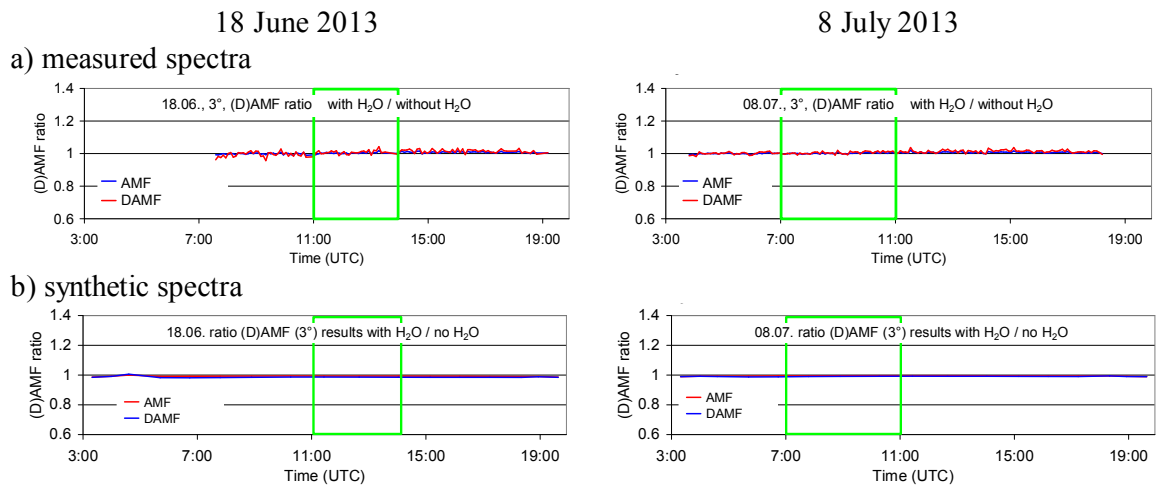

2505  
 2506

2507  
 2508  
 2509  
 2510  
 2511  
 2512  
 2513  
 2514  
 2515  
 2516  
 2517  
 2518  
 2519

Fig. A22 Ratio of the O<sub>4</sub> (d)AMFs derived for the analysis including a H<sub>2</sub>O cross section versus those for the standard analysis (no H<sub>2</sub>O cross section) for both selected days (top: results for spectra measured by the MPIC instrument; bottom: results for synthetic spectra taking into account the temperature dependence of the O<sub>4</sub> cross section).



2520  
 2521  
 2522  
 2523  
 2524  
 2525

Table A21 Average ratios of O<sub>4</sub> (d)AMFs derived for the analysis including a H<sub>2</sub>O cross section versus those for the standard analysis (no H<sub>2</sub>O cross section) for the standard analysis (only one O<sub>4</sub> cross section) for the two middle periods on both selected days (top: results for spectra measured by the MPIC instrument; bottom: results for synthetic spectra taking into account the temperature dependence of the O<sub>4</sub> cross section).

|                                         | AMF ratios                     |                              |  | dAMF ratios                    |                              |
|-----------------------------------------|--------------------------------|------------------------------|--|--------------------------------|------------------------------|
| H <sub>2</sub> O cross section          | 18 June 2013,<br>11:00 – 14:00 | 8 July 2013,<br>7:00 – 11:00 |  | 18 June 2013,<br>11:00 – 14:00 | 8 July 2013,<br>7:00 – 11:00 |
| <b>Measured spectra</b>                 |                                |                              |  |                                |                              |
| H <sub>2</sub> O cross section included | 1.00                           | 1.00                         |  | 1.01                           | 1.01                         |
| <b>Synthetic Spectra</b>                |                                |                              |  |                                |                              |
| H <sub>2</sub> O cross section included | 0.99                           | 1.00                         |  | 0.99                           | 0.99                         |

2526  
 2527  
 2528

2529

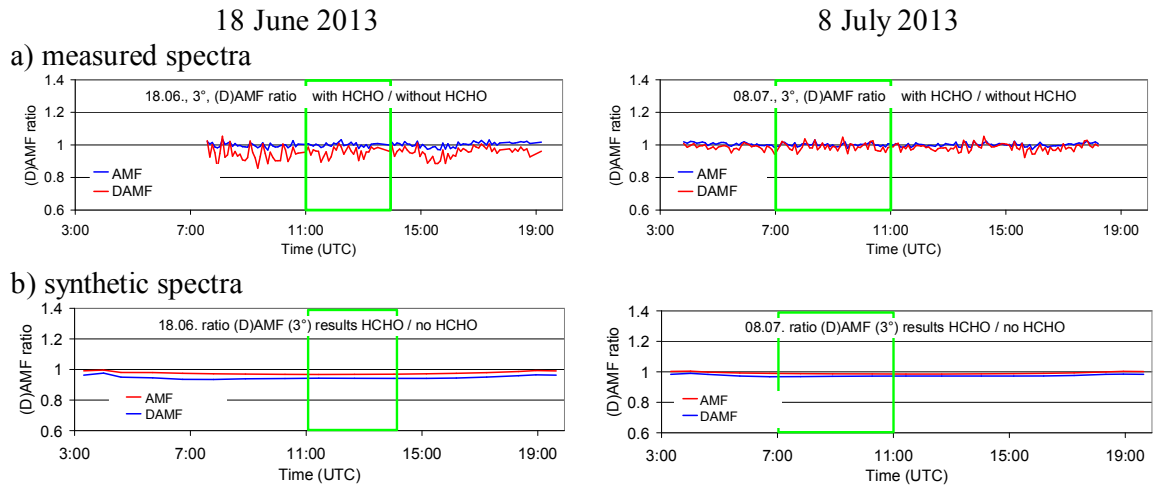

2530

2531  
 2532  
 2533  
 2534  
 2535  
 2536  
 2537  
 2538  
 2539  
 2540  
 2541  
 2542  
 2543  
 2544

Fig. A23 Ratio of the O<sub>4</sub> (d)AMFs derived for the analysis including a HCHO cross section versus those for the standard analysis (no HCHO cross section) for both selected days (top: results for spectra measured by the MPIC instrument; bottom: results for synthetic spectra taking into account the temperature dependence of the O<sub>4</sub> cross section).

2545  
 2546  
 2547  
 2548  
 2549  
 2550

Table A22 Average ratios of O<sub>4</sub> (d)AMFs derived for the analysis including a HCHO cross section versus those for the standard analysis (no HCHO cross section) for the standard analysis (only one O<sub>4</sub> cross section) for the two middle periods on both selected days (top: results for spectra measured by the MPIC instrument; bottom: results for synthetic spectra taking into account the temperature dependence of the O<sub>4</sub> cross section).

|                             | <b>AMF ratios</b>           |                           |  | <b>dAMF ratios</b>          |                           |
|-----------------------------|-----------------------------|---------------------------|--|-----------------------------|---------------------------|
| HCHO cross section          | 18 June 2013, 11:00 – 14:00 | 8 July 2013, 7:00 – 11:00 |  | 18 June 2013, 11:00 – 14:00 | 8 July 2013, 7:00 – 11:00 |
| <b>Measured Spectra</b>     |                             |                           |  |                             |                           |
| HCHO cross section included | 1.00                        | 1.00                      |  | 0.96                        | 0.98                      |
| <b>Synthetic Spectra</b>    |                             |                           |  |                             |                           |
| HCHO cross section included | 0.97                        | 0.99                      |  | 0.94                        | 0.97                      |

2551  
 2552  
 2553  
 2554  
 2555  
 2556  
 2557  
 2558  
 2559  
 2560  
 2561  
 2562  
 2563  
 2564  
 2565  
 2566  
 2567  
 2568  
 2569  
 2570  
 2571  
 2572  
 2573  
 2574  
 2575  
 2576  
 2577  
 2578  
 2579  
 2580  
 2581

18 June 2013

8 July 2013

2582

a) measured spectra

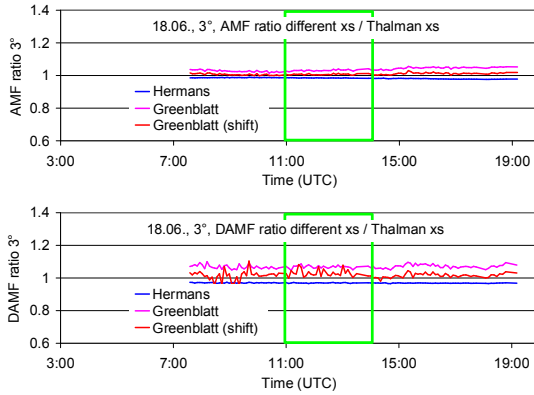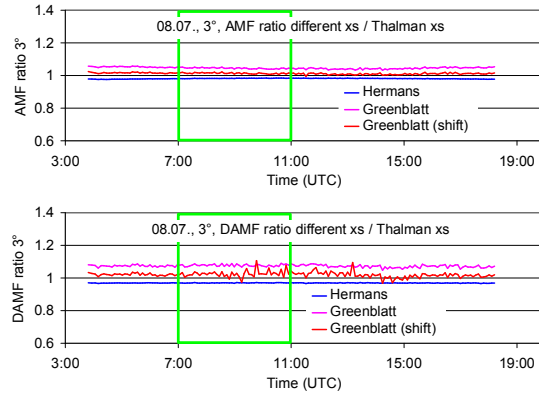

2583

2584

b) synthetic spectra

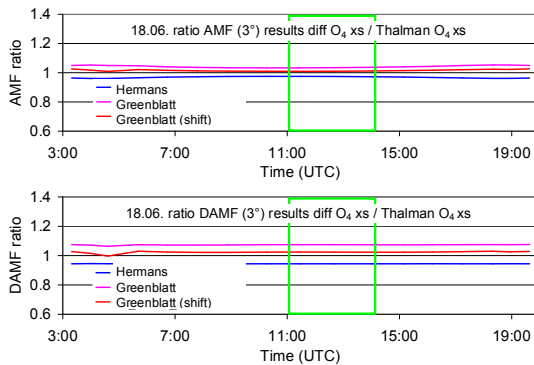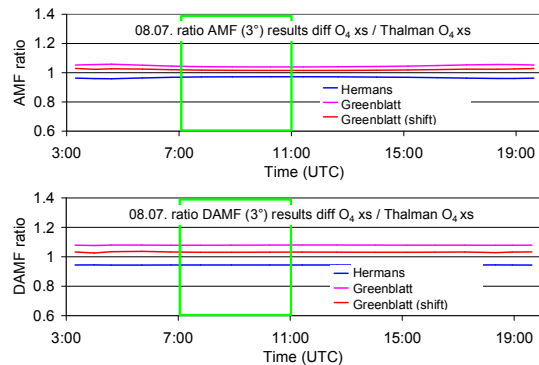

2585

2586

2587

2588

2589

2590

2591

2592

2593

2594

2595

2596

2597

2598

2599

2600

2601

2602

2603

2604

2605

2606

2607

2608

2609

2610

Fig. A24 Ratio of the  $O_4$  (d)AMFs derived for the analyses using different  $O_4$  cross sections versus those for the standard analysis (using the Thalman and Volkamer (2013) cross section) for both selected days (top: results for spectra measured by the MPIC instrument; bottom: results for synthetic spectra taking into account the temperature dependence of the  $O_4$  cross section).

2611 Table A23 Average ratios of O<sub>4</sub> (d)AMFs derived for the analyses using different O<sub>4</sub> cross  
 2612 section versus those for the standard analysis (using the Thalman et al. cross section) for the  
 2613 standard analysis (only one O<sub>4</sub> cross section) for the two middle periods on both selected days  
 2614 (top: results for spectra measured by the MPIC instrument; bottom: results for synthetic  
 2615 spectra taking into account the temperature dependence of the O<sub>4</sub> cross section).

|                              | AMF ratios                     |                              |  | dAMF ratios                    |                              |
|------------------------------|--------------------------------|------------------------------|--|--------------------------------|------------------------------|
| O <sub>4</sub> cross section | 18 June 2013,<br>11:00 – 14:00 | 8 July 2013,<br>7:00 – 11:00 |  | 18 June 2013,<br>11:00 – 14:00 | 8 July 2013,<br>7:00 – 11:00 |
| <b>Measured spectra</b>      |                                |                              |  |                                |                              |
| Hermans                      | 0.98                           | 0.98                         |  | 0.97                           | 0.97                         |
| Greenblatt                   | 1.03                           | 1.04                         |  | 1.07                           | 1.08                         |
| Greenblatt shifted           | 1.01                           | 1.01                         |  | 1.03                           | 1.03                         |
| <b>Synthetic Spectra</b>     |                                |                              |  |                                |                              |
| Hermans                      | 0.97                           | 0.97                         |  | 0.94                           | 0.94                         |
| Greenblatt                   | 1.03                           | 1.04                         |  | 1.07                           | 1.08                         |
| Greenblatt shifted           | 1.01                           | 1.02                         |  | 1.02                           | 1.03                         |

2616  
 2617  
 2618

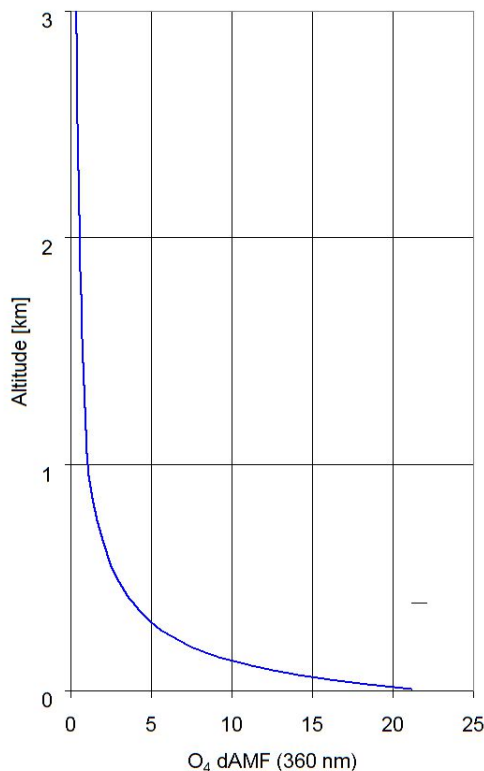

Fig. 25 O<sub>4</sub> differential box-AMFs (with 20m vertical resolution) used for the simulation of the temperature-dependent O<sub>4</sub> absorption spectra. They are averages of radiative transfer simulations for several scenarios. Simulations are performed for a surface albedo of 6 %, aerosol profiles with constant extinction between 0 and 1000m and different AOD (0.1, 0.3, 0.7) and for all combinations of SZA (40, 60°), relative azimuth angles (0, 90, 180°) and elevation angles (2° and 3°).

2619

18 June 2013

8 July 2013

2620

a) measured spectra

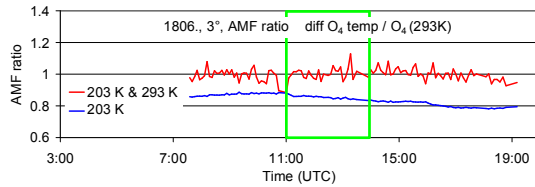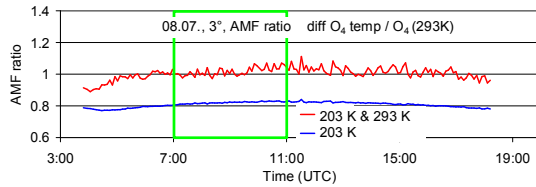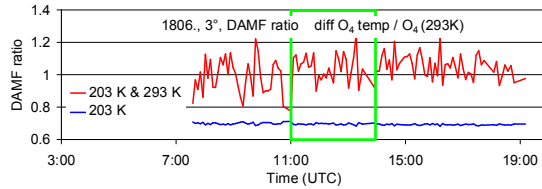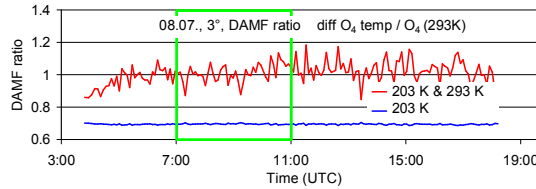

2621

2622

b) synthetic spectra

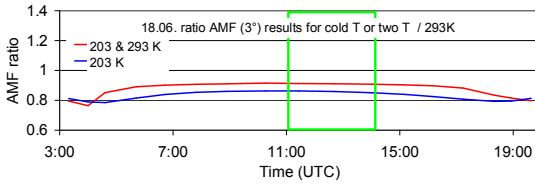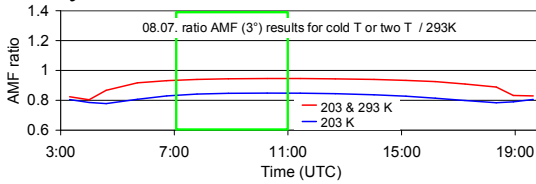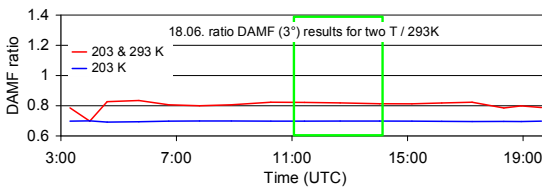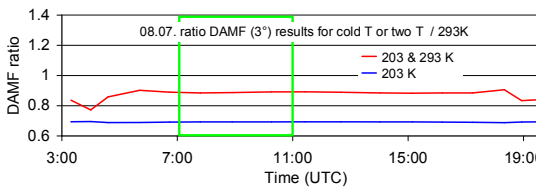

2623

2624

2625

2626

2627

2628

2629

2630

2631

2632

2633

2634

2635

2636

2637

2638

2639

2640

2641

2642

2643

2644

2645

2646

2647

2648

2649

Fig. A26 Ratio of the O<sub>4</sub> (d)AMFs derived for O<sub>4</sub> cross sections at different temperatures (either 203 K or both 203 and 293 K) versus those for the standard analysis (using the O<sub>4</sub> cross section for 293 K) for both selected days (top: results for spectra measured by the MPIC instrument; bottom: results for synthetic spectra taking into account the temperature dependence of the O<sub>4</sub> cross section).

2650 Table A24 Average ratios of O<sub>4</sub> (d)AMFs derived O<sub>4</sub> cross sections at different temperatures  
 2651 (either 203 K or both 203 and 293 K) versus those for the standard analysis (using the O<sub>4</sub>  
 2652 cross section for 293 K) for the two middle periods on both selected days (top: results for  
 2653 spectra measured by the MPIC instrument; bottom: results for synthetic spectra taking into  
 2654 account the temperature dependence of the O<sub>4</sub> cross section). For the simultaneous fit of both  
 2655 temperatures also the results for the spectral range 345 – 374 nm (one O<sub>4</sub> absorption band) are  
 2656 included.

|                               | AMF ratios                     |                              |  | dAMF ratios                    |                              |
|-------------------------------|--------------------------------|------------------------------|--|--------------------------------|------------------------------|
| O <sub>4</sub> cross sections | 18 June 2013,<br>11:00 – 14:00 | 8 July 2013,<br>7:00 – 11:00 |  | 18 June 2013,<br>11:00 – 14:00 | 8 July 2013,<br>7:00 – 11:00 |
| <b>Measured Spectra</b>       |                                |                              |  |                                |                              |
| 203 K                         | 0.85                           | 0.82                         |  | 0.70                           | 0.70                         |
| 203 & 293 K                   | 1.00                           | 1.02                         |  | 1.04                           | 1.01                         |
| 203 & 293 K<br>(345 – 374 nm) | 0.91                           | 1.04                         |  | 0.95                           | 1.02                         |
| <b>Synthetic Spectra</b>      |                                |                              |  |                                |                              |
| 203 K                         | 0.86                           | 0.84                         |  | 0.70                           | 0.69                         |
| 203 & 293 K                   | 0.91                           | 0.94                         |  | 0.82                           | 0.89                         |
| 203 & 293 K<br>(345 – 374 nm) | 0.99                           | 1.00                         |  | 0.99                           | 1.00                         |

2657  
 2658  
 2659  
 2660  
 2661  
 2662  
 2663  
 2664  
 2665  
 2666  
 2667  
 2668  
 2669  
 2670  
 2671  
 2672  
 2673  
 2674  
 2675  
 2676  
 2677  
 2678  
 2679  
 2680  
 2681  
 2682

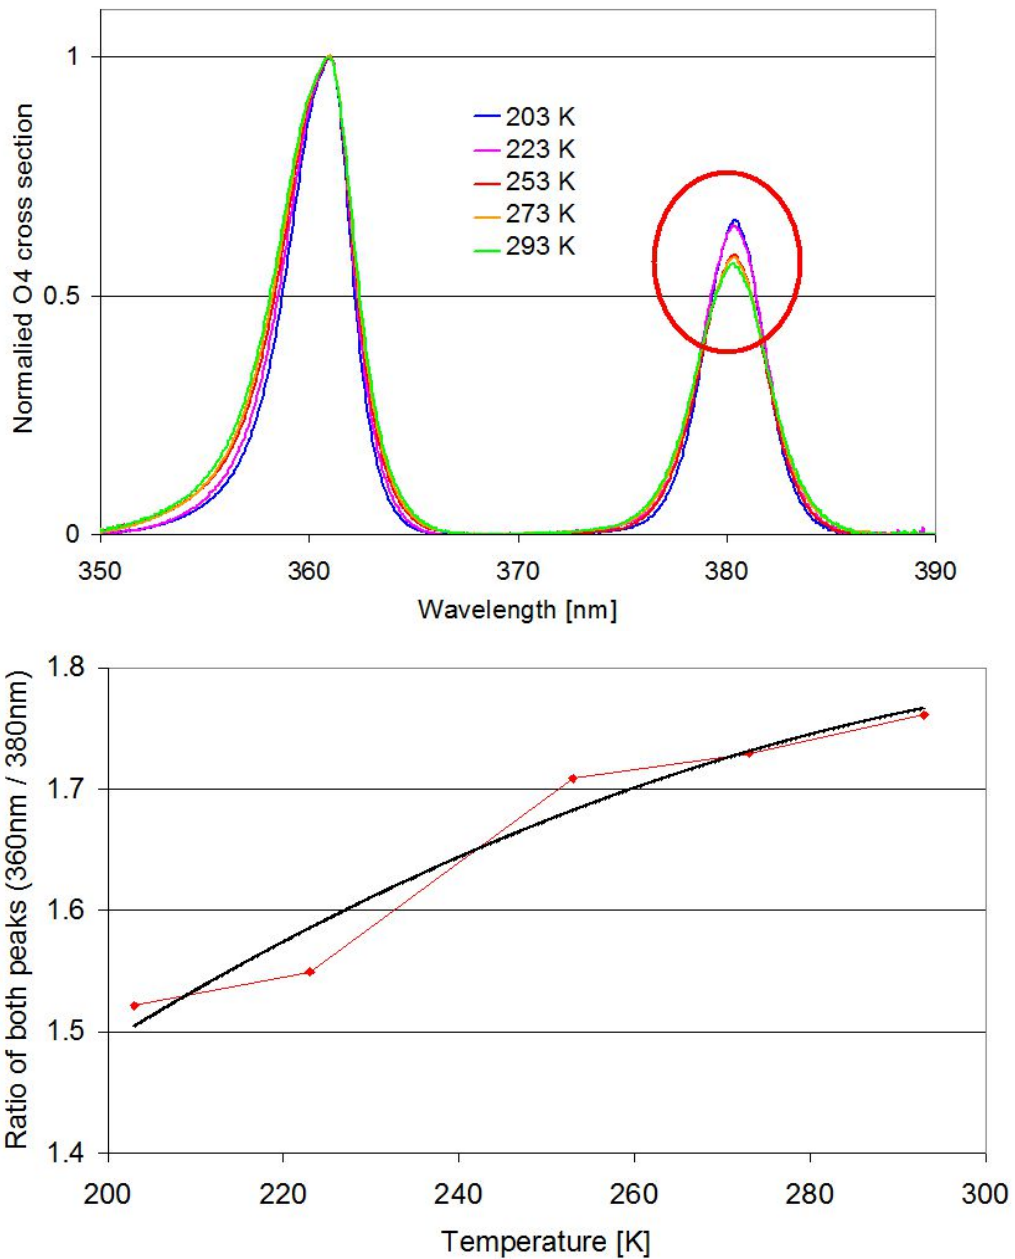

2684 Fig. A27 Top: Comparison of the O<sub>4</sub> cross sections from Thalman and Volkamer (2013) for  
 2685 different temperatures. The cross sections are divided by the maximum values at 360 nm.  
 2686 After this normalisation, the resulting values at 380 nm fall into two groups (high values for  
 2687 203 & 223K, low values for 253, 273, 293K). Bottom: Ratio of the peaks of the O<sub>4</sub>  
 2688 cross section at 360 nm and 380 nm as function of temperature (red points). The black curve is a  
 2689 fitted low order polynomial.  
 2690  
 2691  
 2692  
 2693  
 2694  
 2695  
 2696

2697  
2698

18 June 2013

8 July 2013

2699 a) measured spectra

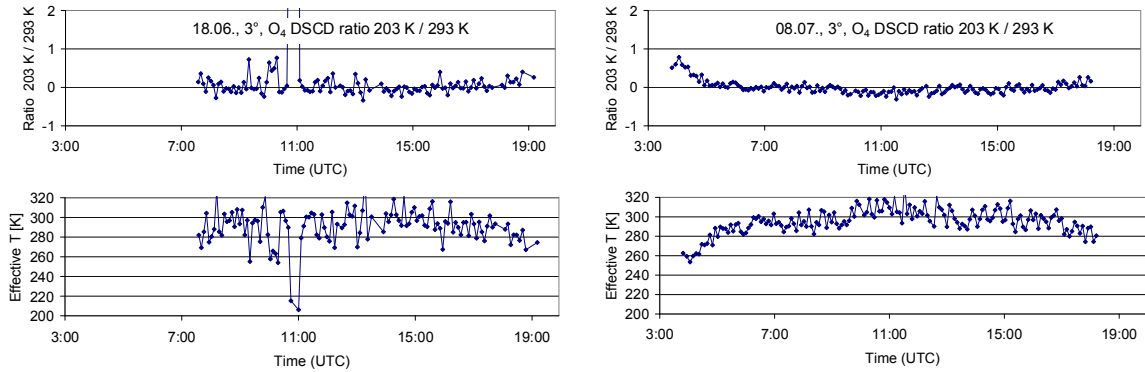

2700 b) synthetic spectra

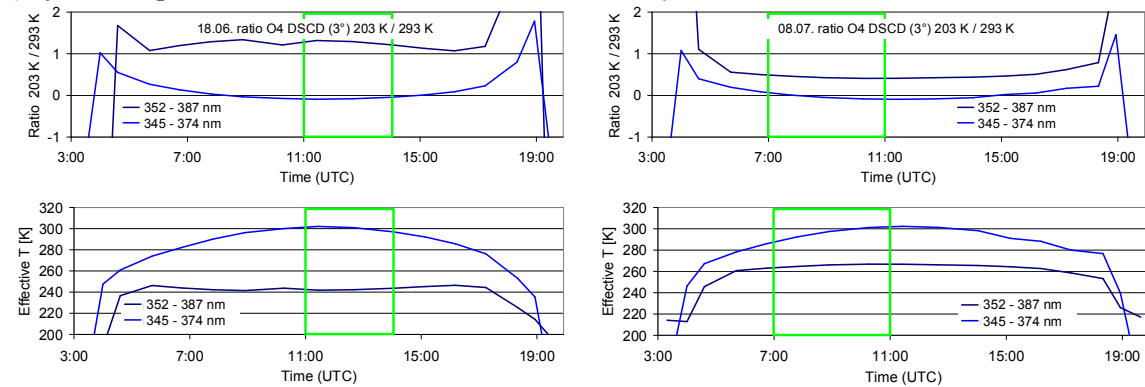

2701  
2702  
2703  
2704  
2705  
2706  
2707  
2708  
2709  
2710  
2711  
2712  
2713  
2714  
2715  
2716  
2717  
2718  
2719  
2720  
2721  
2722  
2723  
2724  
2725

Fig. A28 Ratio of the derived O<sub>4</sub> dSCDs for 203 K and 293 K as well s the derived effective temperatures for the analyses with both cross sections included.



2726  
 2727  
 2728  
 2729  
 2730  
 2731  
 2732  
 2733  
 2734

Table A25 a) Average ratios of O<sub>4</sub> (d)AMFs derived from the analysis of MPIC spectra by different groups versus the analysis of MPIC spectra by MPIC (standard analysis). b) Average ratios of O<sub>4</sub> (d)AMFs derived from spectra of other groups analysed by MPIC versus the analysis of MPIC spectra by MPIC (using the same analysis settings and spectral range: 335 – 374 nm). c) Average ratios of O<sub>4</sub> (d)AMFs derived from spectra of other groups analysed by the same groups using individual analysis settings versus the analysis of MPIC spectra by MPIC (standard analysis).

| Measurements / Analysis                                 | AMF ratios                  |                           |  | dAMF ratios                 |                           |
|---------------------------------------------------------|-----------------------------|---------------------------|--|-----------------------------|---------------------------|
|                                                         | 18 June 2013, 11:00 – 14:00 | 8 July 2013, 7:00 – 11:00 |  | 18 June 2013, 11:00 – 14:00 | 8 July 2013, 7:00 – 11:00 |
| <b>a) MPIC spectra analysed by other groups</b>         |                             |                           |  |                             |                           |
| BIRA                                                    | 0.96                        | 0.98                      |  | 0.95                        | 0.95                      |
| IUP-B                                                   | 1.03                        | 0.98                      |  | 1.05                        | 0.99                      |
| INTA                                                    | 1.02                        | 0.97                      |  | 1.05                        | 0.94                      |
| CMA                                                     | 0.97                        | 0.98                      |  | 0.98                        | 0.95                      |
| CSIC                                                    | 0.94                        | 0.94                      |  | 0.95                        | 0.94                      |
| <b>b) Other spectra analysed by MPIC (335 – 374 nm)</b> |                             |                           |  |                             |                           |
| BIRA                                                    | 0.98                        | 0.99                      |  | 0.89                        | 0.95                      |
| IUP-B                                                   | 1.05                        |                           |  | 1.07                        |                           |
| IUP-HD                                                  | 0.97                        |                           |  | 1.00                        |                           |
| <b>c) Other spectra analysed by the same groups</b>     |                             |                           |  |                             |                           |
| BIRA                                                    | 0.94                        | 0.94                      |  | 0.91                        | 0.92                      |
| IUP-B                                                   | 0.95                        |                           |  | 0.88                        |                           |
| IUP-HD                                                  | 1.01                        |                           |  | 1.04                        |                           |

2735  
 2736  
 2737  
 2738  
 2739  
 2740  
 2741  
 2742  
 2743  
 2744  
 2745  
 2746  
 2747  
 2748  
 2749  
 2750  
 2751  
 2752  
 2753  
 2754

2755 **Appendix A5 Extraction of aerosol extinction profiles**

2756

2757 In this section, the procedure for the extraction of aerosol extinction profiles is described. The  
2758 aerosol profiles are derived from the ceilometer measurements (yielding the profile  
2759 information) in combination with the sun photometer measurements (yielding the vertically  
2760 integrated aerosol extinction, the aerosol optical depth AOD).

2761 The ceilometer raw data consist of range-corrected backscatter profiles averaged over 15  
2762 minutes. The profiles range from the surface to an altitude of 15360m with a height resolution  
2763 of 15m. Here it is important to note that due to limited overlap of the outgoing Laser beam and  
2764 the field of view of the telescope, no profile data is available below 180 m. The ceilometer  
2765 profiles (hourly averages) are shown in Fig. A29 for both selected days.

2766 The AERONET sun photometer data provide the AOD at different wavelengths (340, 360,  
2767 440, 500, 675, 870, and 1020 nm) in time intervals of 2 – 25 min if the direct sun is visible.

2768 To determine profiles of aerosol extinction from the ceilometer backscatter data, several  
2769 processing steps have to be performed. They are described in the sub-sections below.

2770

2771

**A) Smoothing and extrapolating of the ceilometer backscatter profiles**

2772

2773 First, the ceilometer data are averaged over several hours to reduce the scatter. For that  
2774 purpose on both days three time periods are identified, for which the backscatter profile show  
2775 relatively small variations. The profiles for these periods are shown in Fig. A29. In addition  
2776 to the temporal averaging, the profiles are also vertically smoothed above 2 km. Above  
2777 altitudes between 5 to 6 km (depending on the period) the (smoothed) ceilometer backscatter  
2778 profiles become zero. Thus the aerosol extinction profiles above these altitudes are set to zero.  
2779 Below 180 m above the surface the ceilometer becomes ‘blind’ for the aerosol extinction  
2780 because of the insufficient overlap between the outgoing laser beam and the field of view of  
2781 the telescope. Thus the profiles have to be extrapolated down to the surface. This  
2782 extrapolation constitutes an important source of uncertainty. To estimate the associated errors,  
2783 the extrapolation is performed in three different ways:

2784

1) The value below 180 m are set to the value measured at 180m.

2785

2) The values below 180m are linearly extrapolated assuming the same slope below 180 m as  
2786 between 180m and 240m.

2787

3) The values below 180m are linearly extrapolated by the double slope between 180m and  
2788 240m.

2789

2790

2791

2792

2793

2794

2795

2796

2797

2798

2799

2800

2801

2802

2803

2804

2805

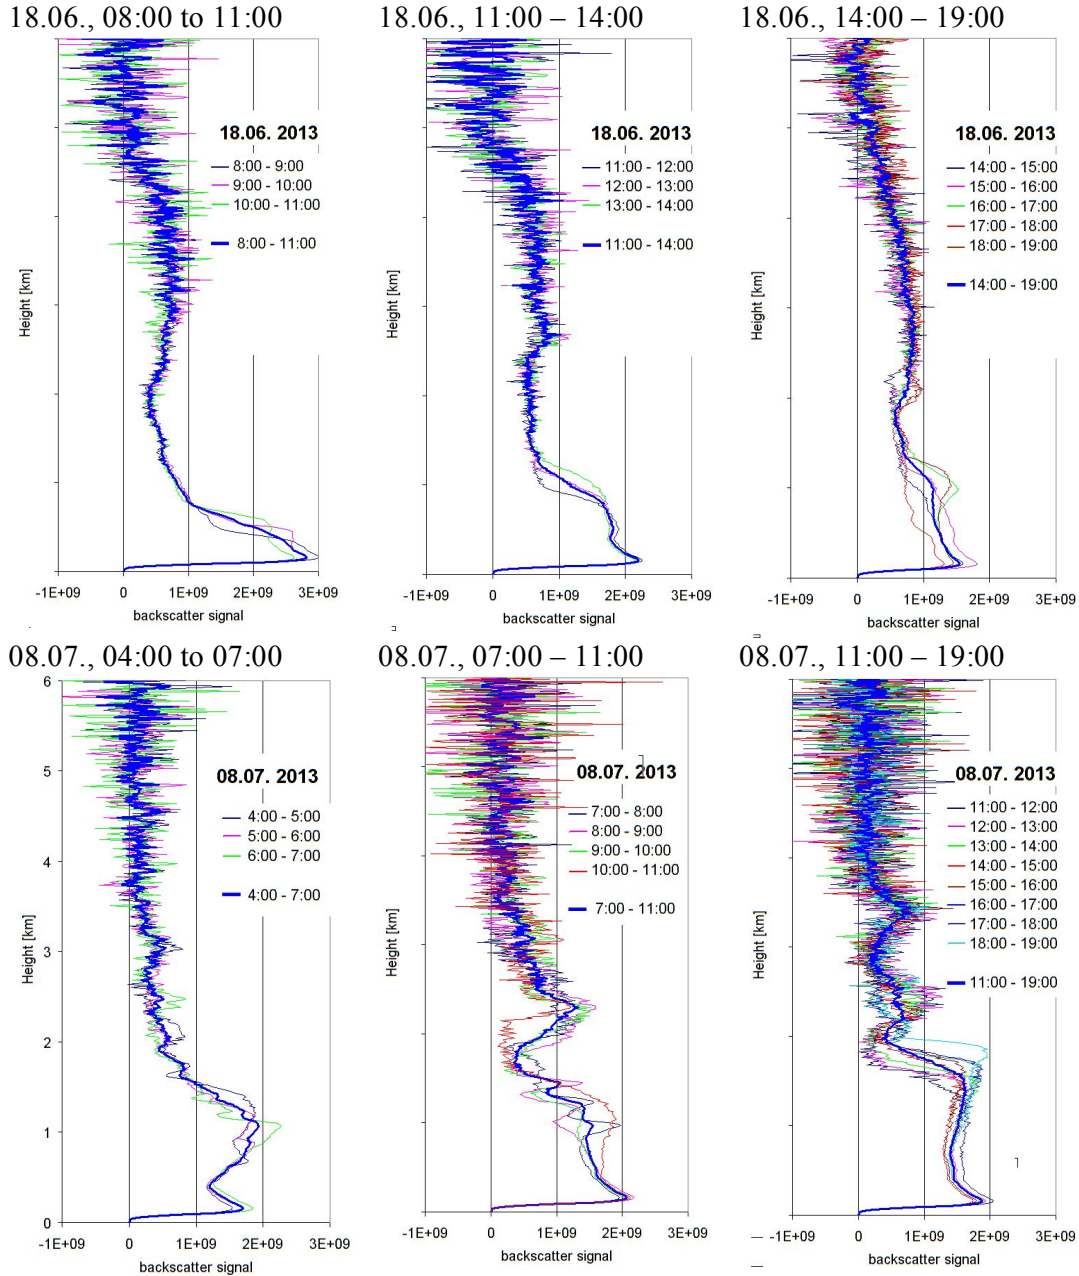

2807 Fig. A29 Range-corrected backscatter profiles (hourly averages) for the three selected periods  
 2808 on both days. Also the averages over the the whole periods are shown (thick lines).  
 2809

2810

2811

**B) Scaling of the Ceilometer profiles by sun photometer AOD at 1020 nm**

2812

2813 The scaling of the ceilometer backscatter profiles by the AOD at 1020 nm is an intermediate  
 2814 step, which is necessary for the correction of the aerosol self-extinction. The average AOD at  
 2815 1020 nm for the different selected time periods on both days is shown in Table A26. In that  
 2816 table also the average values at 380 nm are shown, which are used for a second scaling (see  
 2817 below).

2818 The backscatter profiles are vertically integrated and then the whole profiles are scaled by the  
 2819 ratio:

2820  
2821  
2822  
2823  
2824  
2825  
2826  
2827  
2828  
2829

$$AOD_{1020nm} / B_{int} \tag{A1}$$

Here  $B_{int}$  indicates the integrated backscatter profile.

Note that the wavelength of the ceilometer measurements (1064 nm) is slightly different from the sun photometer measurements (1020 nm), but the difference of the AOD is negligible (typically < 4%).

Table A26 Average AOD at 1020 and 360 nm derived from the sun photometer.

| Time                      | AOD 1020 nm | AOD 360 nm* |
|---------------------------|-------------|-------------|
| 18.06.2013, 08:00 - 11:00 | 0.124       | 0.379       |
| 18.06.2013, 11:00 - 14:00 | 0.122       | 0.367       |
| 18.06.2013, 14:00 - 19:00 | 0.118       | 0.296       |
| 08.07.2013, 04:00 - 07:00 | 0.045       | 0.295       |
| 08.07.2013, 07:00 - 14:00 | 0.053       | 0.333       |
| 08.07.2013, 11:00 - 19:00 | 0.055       | 0.348       |

2830  
2831  
2832  
2833  
2834

\*Average of AOD at 340 nm and 380 nm.

### C) Correction of the aerosol extinction

2835  
2836  
2837  
2838  
2839  
2840

The photons received by the ceilometer have undergone atmospheric extinction. Here, Rayleigh scattering can be ignored because of the long wavelength of the ceilometer (optical depth below 2 km is < 0.001). However, while the extinction due to aerosol scattering is also small at these long wavelengths it systematically affects the ceilometer signal and has to be corrected. The extinction correction is performed according to the following formula:

2841

$$\alpha_{i,corr} = \frac{\alpha_i}{\exp\left(-2 \cdot \sum_{z_0}^{z_{i-1}} \alpha_{j,corr} \cdot (z_j - z_{j-1})\right)} \tag{A2}$$

2842  
2843  
2844  
2845  
2846  
2847  
2848  
2849  
2850  
2851  
2852  
2853  
2854  
2855  
2856  
2857  
2858  
2859

Here  $\alpha_i$  represent the uncorrected extinction and  $\alpha_{i,corr}$  represents the corrected extinction at height layer i (with  $z_i$  is the lower boundary of that height layer). Equation C1 has to be subsequently applied to all height layers starting from the surface ( $z_0$ ). Note that the factor of two accounts for the extinction both paths between the instrument and the scattering altitude (way up and down). The extinction correction is performed at a vertical resolution of 15m. After the extinction correction, the profiles are scaled by the corresponding AOD at 360 nm (see table A26 In Fig. A30 the profiles with and without extinction correction are shown. The extinction correction slightly increases the values at higher altitudes and decreases the values close to the surface. The effect of the extinction correction is larger on 18 June 2013 (up to 12 %).

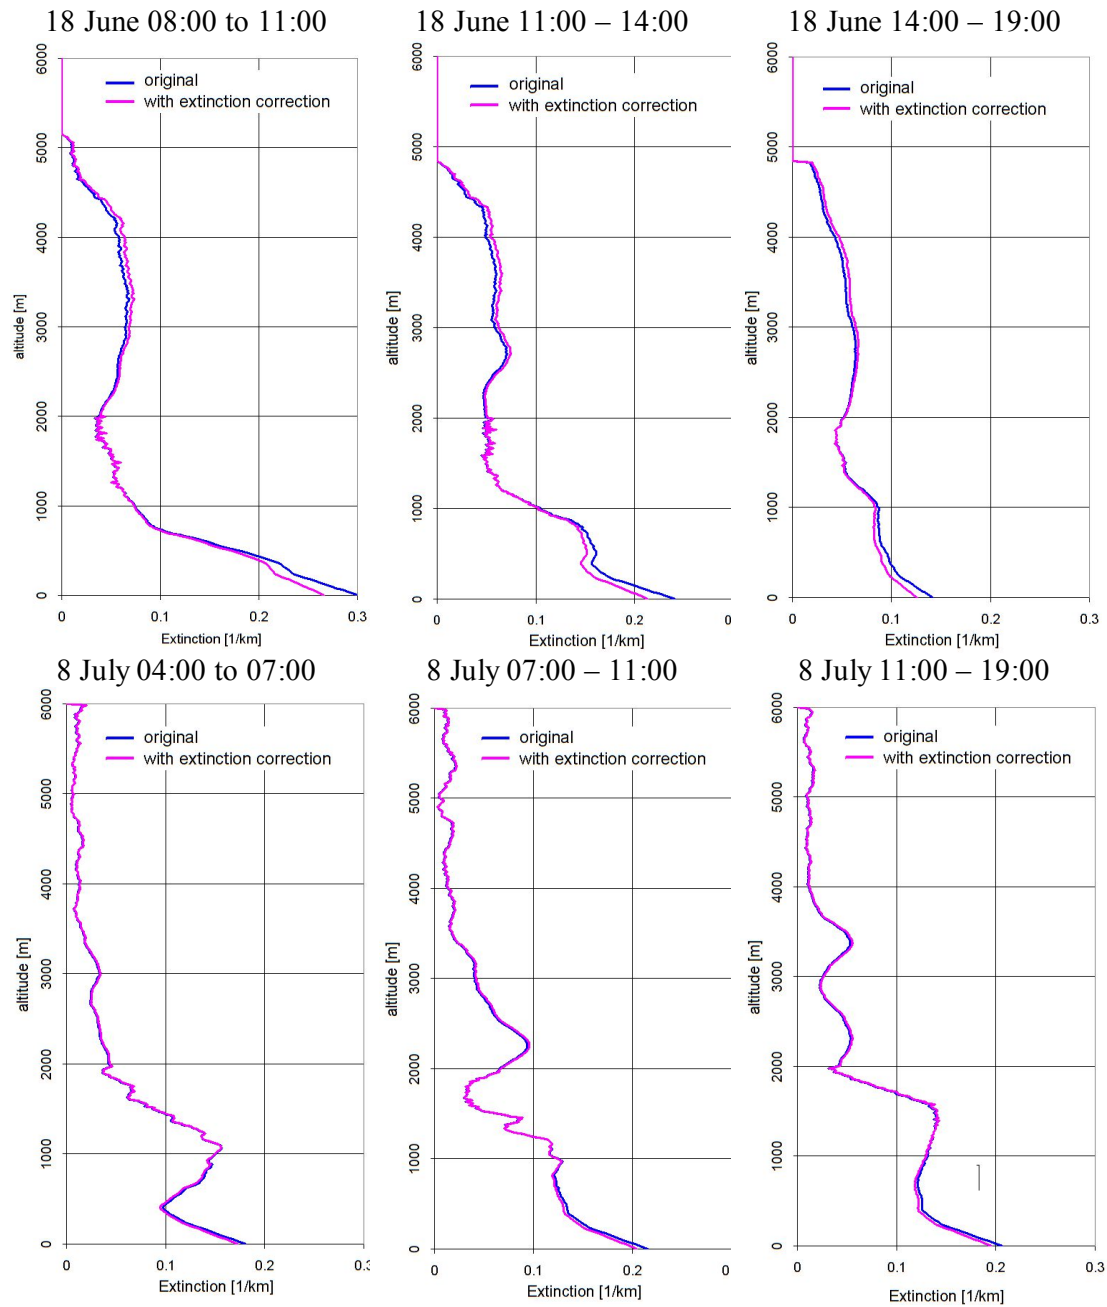

2860 Fig. A30 Comparison of profiles (linear extrapolation below 180 m) without (blue) and with  
 2861 (magenta) extinction correction. Both profiles are scaled to the same total AOD (at 360 nm)  
 2862 determined from the sun photometer.  
 2863  
 2864

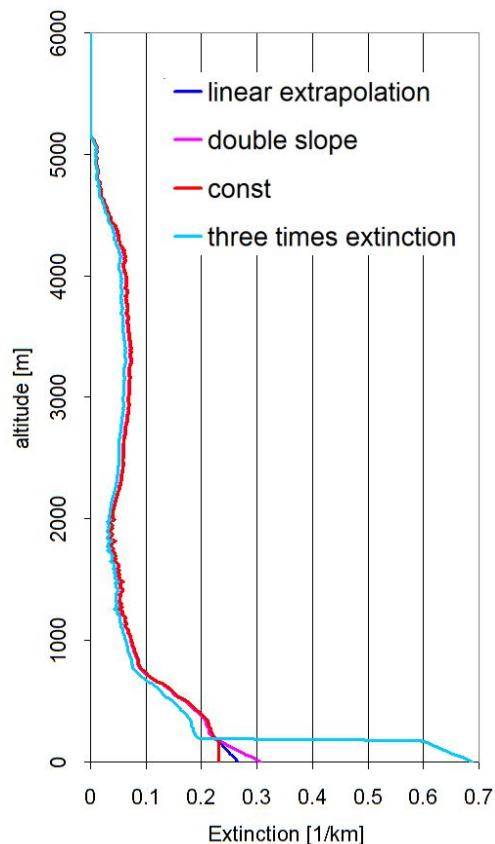

2865  
 2866 Fig. A31 Aerosol profile (light blue) with extreme extinction close to the surface (below 180  
 2867 m, the altitude for which the ceilometer is sensitive) extracted for the first period (8:00 –  
 2868 11:00) on 18 June 2013. Also shown are the profiles extrapolated below 180 as described  
 2869 above.

2870  
 2871  
 2872  
 2873  
 2874  
 2875  
 2876  
 2877  
 2878  
 2879  
 2880  
 2881  
 2882  
 2883  
 2884  
 2885  
 2886  
 2887  
 2888  
 2889  
 2890  
 2891  
 2892

#### **D) Influence of a changing LIDAR ratio with altitude**

For the extraction of the aerosol profiles described above, a fixed LIDAR ratio was assumed, which implies that the aerosol properties are independent from altitude. However, this is a rather strong assumption, because it can be expected that the aerosol properties (e.g. the size) change with altitude. With the available limited information, it is impossible to derive detailed information about the altitude dependence of the aerosol properties, but it can be how representative the ceilometer measurements at 1020 nm are for the aerosol extinction profiles at 360 nm. For these investigations we again focus on the middle periods of both selected days. From the AERONET Almuantar observations information on the size distribution for these periods is available (see Fig. A32). On both days two pronounced modes (fine and coarse mode) are found with a much larger coarse mode fraction on 18 June compared to 8 July. From the AERONET observations, also separate phase functions for the fine and coarse mode as well as the relative contribution of both modes to the total aerosol optical depth at 500 nm are available. On 18 June and 8 July the relative contributions to the total AOD at 500 nm are 40 % and 5 %, respectively. Assuming that the AOD of the coarse mode fraction is independent on wavelength, the relative contributions of the coarse mode at 360 nm and 1040 nm can be derived (see Table A27).

2893  
2894

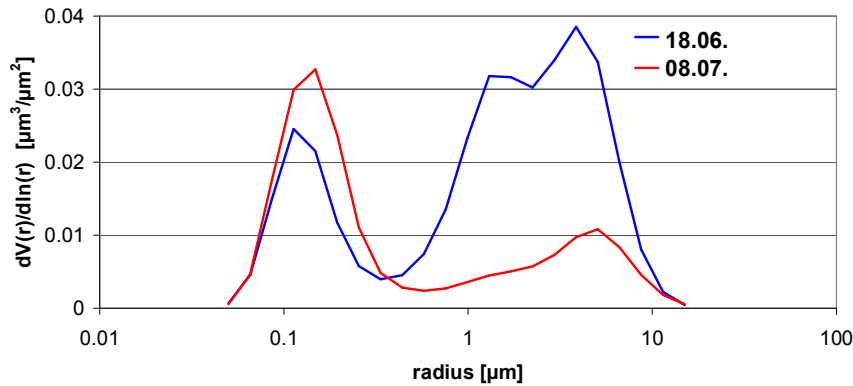

2895  
2896  
2897  
2898  
2899  
2900

Fig. A32 Size distributions derived from AERONET Almucatar observations on 18 June (07:24 & 15:34) and 08 July (07:32 & 15:38).

Table A27 Contribution of the coarse mode to the total AOD at different wavelengths

| <u>Date</u>                   | <u>Total AOD 360 nm</u> | <u>Total AOD 1020 nm</u> | <u>Relative contribution of coarse mode 360 nm</u> | <u>Relative contribution of coarse mode 1020 nm</u> |
|-------------------------------|-------------------------|--------------------------|----------------------------------------------------|-----------------------------------------------------|
| <u>18 June, 11:00 – 14:00</u> | <u>0.37</u>             | <u>0.12</u>              | <u>24.9%</u>                                       | <u>77.7%</u>                                        |
| <u>08 July, 07:00 – 11:00</u> | <u>0.33</u>             | <u>0.055</u>             | <u>3.0%</u>                                        | <u>18.1%</u>                                        |

2901  
2902  
2903  
2904  
2905  
2906  
2907  
2908  
2909  
2910  
2911  
2912  
2913  
2914  
2915

It is found that on 18 June the coarse mode clearly dominates the AOD at 1020 nm, whereas on 8 July it only contributes about 20 % to the total AOD. As expected the relative contributions of the coarse mode to the AOD at 360 nm are much smaller (25 % and 3%). In the last step the probability of aerosol scattering in backward direction is considered, because the ceilometer receives scattered light from that direction. For that purpose the ratios of the optical depths are multiplied by the corresponding values of the normalised phase functions at 180° and in this way the relative contributions to the backscattered signals from the coarse mode for both wavelengths and both days are calculated (Table A28). Interestingly, on 8 July the contributions of the coarse mode to the backscattered signal at both wavelengths differs only by about 10%. In contrast, on 18 June the difference is much larger.

Table A28 Ratio of phase functions (coarse / fine) in backward direction and relative contribution of coarse mode to the backscattered signal at both wavelengths

| <u>Date</u>                   | <u>Ratio phase function at 360 nm</u> | <u>Ratio phase function at 1020 nm</u> | <u>Relative contribution of coarse mode at 360 nm</u> | <u>Relative contribution of coarse mode at 1020 nm</u> |
|-------------------------------|---------------------------------------|----------------------------------------|-------------------------------------------------------|--------------------------------------------------------|
| <u>18 June, 11:00 – 14:00</u> | <u>1.13</u>                           | <u>0.61</u>                            | <u>27.3%</u>                                          | <u>68.0%</u>                                           |
| <u>08 July, 07:00 – 11:00</u> | <u>2.7</u>                            | <u>0.99</u>                            | <u>7.8%</u>                                           | <u>18.0%</u>                                           |

2916  
2917  
2918  
2919

For 8 July, the results can be interpreted in the following way: at 360 nm the aerosol profiles extracted as described above overestimate the contribution from the coarse mode by about

2920 10%. To estimate the effect of this overestimation we construct modified aerosol extinction  
 2921 profiles, in which 10% of the total AOD is relocated. Since we expect that the coarse mode  
 2922 aerosols are usually located at low altitude, we construct 4 different modified profiles (see  
 2923 Fig. A33) with different altitudes (1.5 km, 1 km, 0.75 km, or 0.5 km), below which 10% of  
 2924 the aerosol extinction is relocated to altitudes above (assuming that the coarse mode aerosol is  
 2925 only located below these altitudes). Of course, such a sharp boundary is not very realistic, but  
 2926 it allows to quantify the overall effect of the relocation. Here it should be noted that we  
 2927 selected the aerosol profile for 8 July extracted by INTA which reached up to 7 km (see Fig.  
 2928 9).  
 2929

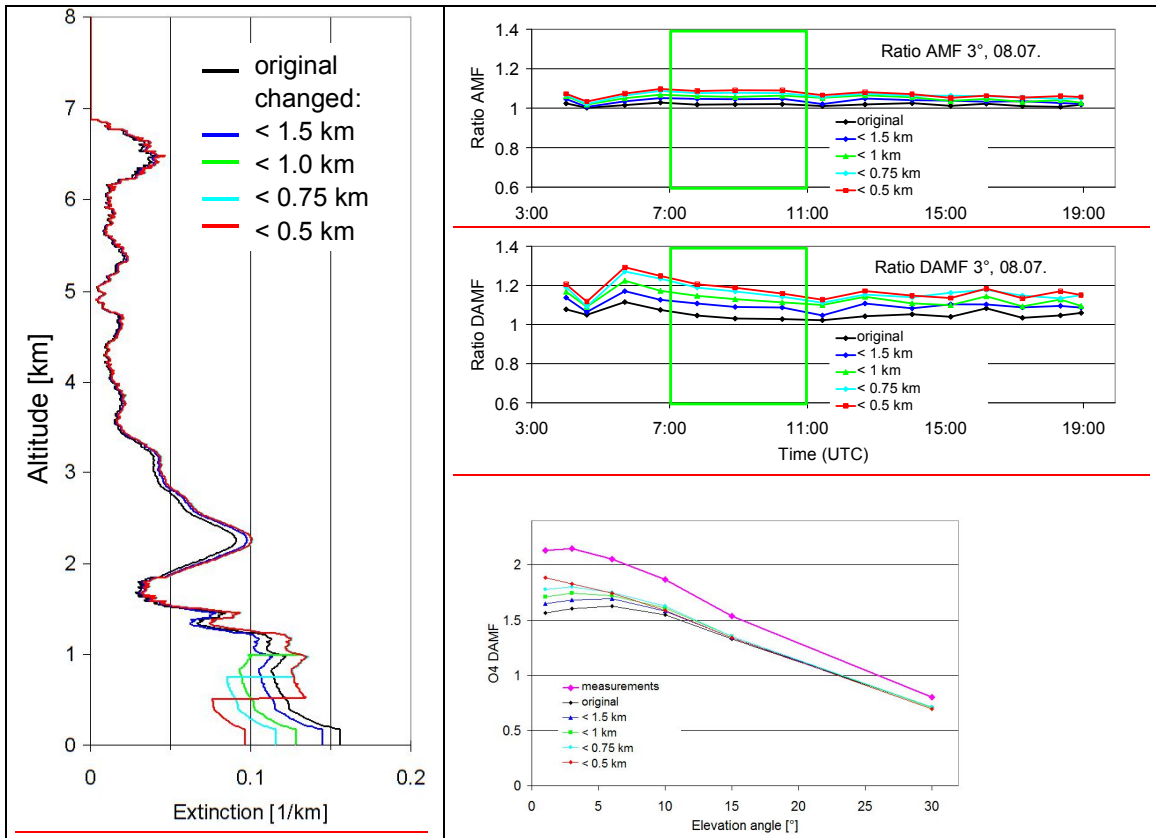

2930 Fig. A33 Left: Modified aerosol profiles for 08 July assuming that the coarse mode aerosol is  
 2931 only located in the lowest part of the atmosphere. Top right: ratios of the (d)AMFs calculated  
 2932 for the modified profiles compared to the dAMFs for the standard settings. With decreasing  
 2933 layer height the (d)AMFs increase systematically, because the aerosol extinction close to the  
 2934 surface decreases. Right bottom: comparison of the measured elevation dependence of the O<sub>4</sub>  
 2935 dAMFs for the period 7:00 – 11:00 on 8 July and simulation results for the different profiles.

2936  
 2937  
 2938 Table A29 Ratio of the (d)AMFs for the modified profiles versus those of the standard  
 2939 settings

|             | <u>original</u><br><u>INTA</u> | <u>coarse mode</u><br><u>below 1.5 km</u> | <u>coarse mode</u><br><u>below 1 km</u> | <u>coarse mode</u><br><u>below 0.75 km</u> | <u>coarse mode</u><br><u>below 0.5 km</u> |
|-------------|--------------------------------|-------------------------------------------|-----------------------------------------|--------------------------------------------|-------------------------------------------|
| <u>AMF</u>  | <u>1.02</u>                    | <u>1.04</u>                               | <u>1.05</u>                             | <u>1.06</u>                                | <u>1.08</u>                               |
| <u>dAMF</u> | <u>1.04</u>                    | <u>1.09</u>                               | <u>1.13</u>                             | <u>1.17</u>                                | <u>1.18</u>                               |

2940  
 2941 For all modified profiles, a systematic increase of the O<sub>4</sub> (d)AMFs compared to those for the  
 2942 standard settings is found. For the O<sub>4</sub> dAMFs this increase can be up to 18 % (see Table A29.



2943 From the comparison of the elevation dependence of the measured and simulated O<sub>4</sub> dAMFs  
2944 (see Fig. A33), we conclude that the aerosol profile with the coarse mode aerosol below 0.75  
2945 km is probably the most realistic one. The main conclusion from this section ist that the  
2946 dAMFs for 8 July derived from the standard settings probably underestimates the true dAMF  
2947 by about 15 ±5 %.

2948 For 18 June we did not perform similarly detailed calculations, because on that day the  
2949 uncertainties of the aerosol extinction profile caused by the missing sensitivity of the  
2950 ceilometer below 180 m are much larger than on 8 July. On 18 June also the magnitude of the  
2951 relocation of the aerosol extinction between different altitudes would be much larger than on  
2952 8 July.

2953  
2954  
2955  
2956

#### 2957 Appendix A6 Influence of elevated aerosol layers on the O<sub>4</sub> (d)AMF

2958  
2959  
2960  
2961  
2962  
2963  
2964  
2965  
2966  
2967

Ortega et al. (2016) showed that for their measurements the consideration of elevated aerosol  
layers (between about 3 and 5 km) is essential to bring measured and simulated O<sub>4</sub> (d)AMFs  
into agreement. In our study, we consider aerosol layers over an even larger altitude range (up  
to 7 km). Nevertheless, it is interesting to see how the simulated O<sub>4</sub> (d)AMFs change if the  
extinctions at various altitude ranges are changed systematically. Here we chose the aerosol  
extinction profile extracted by INTA for the period 7:00 to 11:00 on 8 July, because it  
contains substantial amounts of aerosols in elevated layers (see Fig. 9). During that period  
three distinct aerosol layers can be identified (see Table A30).

2968

Table A30 Selection of different aerosol layers on 08 July (07:00 – 11:00)

| <u>layer</u>         | <u>AOD</u>   | <u>Relative contribution</u><br><u>to total AOD</u> |
|----------------------|--------------|-----------------------------------------------------|
| <u>0 – 1.68 km</u>   | <u>0.186</u> | <u>55.4 %</u>                                       |
| <u>1.68 – 4.9 km</u> | <u>0.116</u> | <u>34.5 %</u>                                       |
| <u>4.9 – 7 km</u>    | <u>0.035</u> | <u>10.4 %</u>                                       |

2969  
2970  
2971  
2972  
2973  
2974  
2975  
2976  
2977  
2978  
2979  
2980  
2981  
2982  
2983  
2984  
2985  
2986  
2987  
2988

Then, the extinction of the individual aerosol layers were increased by either 20 % or 40 %  
compared to the original profile. These profiles (referred to as ‘without scaling’) were used  
for the simulation of O<sub>4</sub> (d)AMFs). A further set of O<sub>4</sub> (d)AMFs was simulated for the same  
profiles, after they were scaled by a constant factor to match the AOD of the original  
extinction profile (referred to as ‘with scaling’). The modified profiles and the ratios of the  
corresponding O<sub>4</sub> DAMFs versus the O<sub>4</sub> dAMFs of the original profile are shown in Fig. A34.  
For the unscaled profiles the O<sub>4</sub> dAMFs strongly decrease (by about 30%) if the extinction in  
the lowest layer is increased. If the extinction in the middle or upper layer is increased a slight  
increase (about 3 %) of the O<sub>4</sub> dAMFs is found. For the scaled profiles different results are  
found, because the increase of the extinction in one layer is now balanced by a decrease of the  
aerosol extinction in the other layers. If the extinction in the lowest layer is increased by  
40%, the O<sub>4</sub> dAMFs still decrease, but only by about 7%. If the extinction in the middle or  
upper layer is increased the O<sub>4</sub> dAMFs increase by about 3 % and 7 %, respectively.

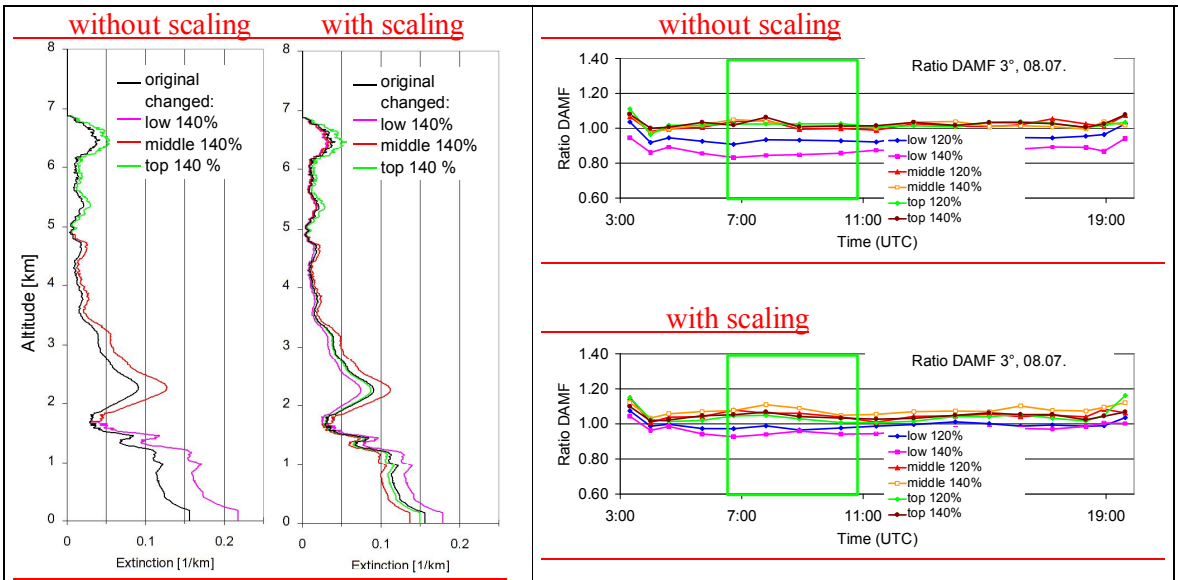

Fig. A34 Left: Aerosol profiles used for the simulations (see text). Right: Ratios of the  $O_4$  (d)AMFs simulated for the modified profiles versus those of the original profile.

2989  
 2990  
 2991  
 2992  
 2993  
 2994  
 2995  
 2996  
 2997  
 2998  
 2999  
 3000  
 3001  
 3002
